# Supplementary material for: Unique protonation states of aspartate and topaquinone in the active site of copper amine oxidase
Source: PubMed Central journal article supplement — RSC Adv. 2020 Oct 21;10(63):38631–9. doi: 10.1039/d0ra06365g (PMC9057271; doi:10.1039/d0ra06365g), 2020-10-21
Supplement: RA-010-D0RA06365G-s001.pdf [file RA-010-D0RA06365G-s001.pdf]

Electronic Supplementary Information

Unique protonation states of aspartate and topaquinone in the active site of copper amine oxidase

Mitsuo Shoji, Takeshi Murakawa, Mauro Boero, Yasuteru Shigeta, Hideyuki Hayashi and  
Toshihide Okajima

Contents

Table S1. Relative energies and RMSD values.

Figure S1. QM/MM whole system used in the present study.

Figure S2. Superimposed view of the QM/MM optimized structures (**0** and **1**) in **Full** state compared to the ND structure.

Figure S3. Superimposed view of the QM/MM optimized structures (**0<sup>2-</sup>**, **1<sup>2-</sup>**, **2<sup>2-</sup>**) in **-2H<sup>+</sup>** state compared to the ND structure.

Figure S4. Superimposed view of the QM/MM optimized structures (**0<sup>3-</sup>**, **1<sup>3-</sup>**) in **-3H<sup>+</sup>** state compared to the ND structure.

Figure S5. Superimposed view of the QM/MM optimized structures with H(**0<sup>-</sup>**), Li<sup>+</sup> and Na<sup>+</sup> compared to the ND structure.

Figure S6. 2D-surface of the distance between the shared proton and O(5) of TPQ (*R*(O(5):TPQ, H:Asp298)) in **-H<sup>+</sup>** state at the QM/MM optimized structures along the *R*(OD:Asp298, H) variables.

Figure S7. 2D-surface of the distance between the OD1 of Asp298 and O(5) of TPQ (*R*(OD1:Asp298, O(5):TPQ)) in **-H<sup>+</sup>** at the QM/MM optimized structures along the *R*(OD:Asp298, H) variables.

Figure S8. 2D-PES of the distal H atom along the distances between the OD atoms of Asp298 and the shared proton ( $x=d(\text{OD1}, \text{H})$ ,  $y=d(\text{OD2}, \text{H})$ ) in **-2H<sup>+</sup>** state.

Figure S9. 2D-surface of the distance between the shared proton and O(5) of TPQ (*R*(O(5):TPQ, H:Asp298)) in **-2H<sup>+</sup>** state at the QM/MM optimized structures along the *R*(OD:Asp298, H) variables.

Figure S10. 2D-surface of the distance between the O(5) of TPQ and OD1 of Asp298 (*R*(O(5):TPQ, OD1:Asp298,)) in **-2H<sup>+</sup>** at the QM/MM optimized structures along the *R*(OD:Asp298, H) variables.

Figure S11. Superimposed view of the QM/MM optimized structures (**imq(0<sup>-</sup>)** and **imq(keto<sup>-</sup>)**) in **imq** state compared to the ND structure.

Figure S12. Superimposed view of the QM/MM optimized structures (**imq(O(2)H<sup>-</sup>)** and **imq(O(4)H<sup>-</sup>)**) in **imq** state compared to the ND structure.

Section S2, Effect of dimerization of AGAO

XYZ atomic coordinates for all the QM/MM optimized states in the QM region. (0, 1, 2, 3, 4, 0<sup>-</sup>, 1<sup>-</sup>, 2<sup>-</sup>, 3<sup>-</sup>, 4<sup>-</sup>, 5<sup>-</sup>, 6<sup>-</sup>, 7<sup>-</sup>, 8<sup>-</sup>, 9<sup>-</sup>, 10<sup>-</sup>, 11<sup>-</sup>, 0<sup>2-</sup>, 1<sup>2-</sup>, 2<sup>2-</sup>, 3<sup>2-</sup>, 4<sup>2-</sup>, 5<sup>2-</sup>, 6<sup>2-</sup>, 7<sup>2-</sup>, 8<sup>2-</sup>, 0<sup>3-</sup>, 1<sup>3-</sup>, 2<sup>3-</sup>, 3<sup>3-</sup>, 4<sup>3-</sup>, 5<sup>3-</sup>, 6<sup>3-</sup>, 7<sup>3-</sup>, 8<sup>3-</sup>, 9<sup>3-</sup>, 10<sup>3-</sup>, imq(0<sup>2-</sup>), imq(0<sup>-</sup>), imq(keto<sup>-</sup>), imq(keto<sub>rot</sub><sup>-</sup>))

Table S1. Relative free energies ( $G$ ) (relative energies ( $E$ ))\* and RMSD values to the neutron (ND) structure.

| State                                          | $G(E) / \text{kcal mol}^{-1}$ | $RMSD / \text{\AA}$ | Protonation state                                                          |
|------------------------------------------------|-------------------------------|---------------------|----------------------------------------------------------------------------|
| Fully protonated ( <b>Full</b> )               |                               |                     | Asp298 protonated                                                          |
| <b>0</b>                                       | 0 (0)                         | 0.251               | TPQ382 O(2) protonated                                                     |
| <b>1</b>                                       | 0.69 (3.10)                   | 0.167               | TPQ382 keto form<br>Asn381 side chain rotated                              |
| <b>2</b>                                       | 1.95 (4.54)                   | 0.264               | TPQ382 keto form                                                           |
| <b>3</b>                                       | 3.24 (4.44)                   | 0.306               | TPQ382 O(4) protonated                                                     |
| <b>4</b>                                       | 9.87 (9.25)                   | 0.375               | TPQ382 O(5) protonated                                                     |
| Deprotonated ( <b>-H<sup>+</sup></b> )         |                               |                     | Asp298 protonated<br>TPQ382 enolate form                                   |
| <b>0<sup>-</sup></b>                           | 0 (0)                         | 0.107               | -                                                                          |
| <b>1<sup>-</sup></b>                           | 7.84(7.77)                    | 0.190               | Asp298 rotated                                                             |
| <b>2<sup>-</sup></b>                           | 19.86 (20.59)                 | 0.294               | TPQ382 O(2) protonated<br>His433 deprotonated<br>Tyr384 OH rotated         |
| <b>3<sup>-</sup></b>                           | 30.01 (31.50)                 | 0.243               | TPQ382 O(4) protonated<br>His433 deprotonated<br>Tyr384 OH rotated         |
| <b>4<sup>-</sup></b>                           | 31.48 (34.21)                 | 0.136               | TPQ382 O(5) protonated<br>His433 deprotonated                              |
| <b>5<sup>-</sup></b>                           | 33.96 (35.62)                 | 0.225               | TPQ382 keto (C(3) protonated)<br>His433 deprotonated<br>Tyr384 OH rotated  |
| <b>6<sup>-</sup></b>                           | 34.84 (37.29)                 | 0.241               | TPQ382 O(5) protonated<br>His433 deprotonated<br>Tyr384 OH rotated         |
| <b>7<sup>-</sup></b>                           | 36.82 (38.49)                 | 0.253               | W(ax) deprotonated (OH(ax))<br>TPQ382 keto form                            |
| <b>8<sup>-</sup></b>                           | 58.78(63.98)                  | 0.167               | TPQ382 keto (C(3) protonated)<br>Asn381 rotated<br>His431 deprotonated     |
| <b>9<sup>-</sup></b>                           | 59.37(62.95)                  | 0.122               | Asp298 protonated<br>W(ax) deprotonated (OH(ax))<br>TPQ382 O(4) protonated |
| <b>10<sup>-</sup></b>                          | 64.03(67.29)                  | 0.117               | Asp298 deprotonated<br>TPQ382 keto form                                    |
| <b>11<sup>-</sup></b>                          | 64.08(69.17)                  | 0.193               | Asp298 deprotonated<br>TPQ382 keto form<br>Asn281 side chain rotated       |
| Doubly deprotonated ( <b>-2H<sup>+</sup></b> ) |                               |                     | TPQ382 enolate form<br>Asp298 protonated                                   |
| <b>0<sup>2-</sup></b>                          | 0 (0)                         | 0.238               | His433 deprotonated<br>Tyr384 OH rotated                                   |
| <b>1<sup>2-</sup></b>                          | 3.00 (3.13)                   | 0.302               | Asp298 rotated<br>His433 deprotonated<br>Tyr384 OH rotated                 |
| <b>2<sup>2-</sup></b>                          | 4.16 (4.54)                   | 0.132               | His431 deprotonated                                                        |
| <b>3<sup>2-</sup></b>                          | 13.07(12.01)                  | 0.158               | His433 deprotonated                                                        |
| <b>4<sup>2-</sup></b>                          | 17.11(17.77)                  | 0.317               | Asp298 deprotonated                                                        |
| <b>5<sup>2-</sup></b>                          | 17.92(18.08)                  | 0.182               | W(ax) deprotonated (OH(ax))                                                |
| <b>6<sup>2-</sup></b>                          | 24.79(17.70)                  | 0.148               | His592 deprotonated                                                        |
| <b>7<sup>2-</sup></b>                          | 37.02(39.35)                  | 0.379               | Asp298 deprotonated<br>W(ax) deprotonated (OH(ax))                         |

|                                                |              |       |                                                                                                                                         |
|------------------------------------------------|--------------|-------|-----------------------------------------------------------------------------------------------------------------------------------------|
| <b>8<sup>2-</sup></b>                          | 39.59(41.21) | 0.392 | TPQ382 keto form<br>Asp298 deprotonated<br>W(ax) deprotonated (OH(ax))<br>TPQ382 O(4) protonated                                        |
| Triply deprotonated ( <b>-3H<sup>+</sup></b> ) |              |       |                                                                                                                                         |
| <b>0<sup>3-</sup></b>                          | 0 (0)        | 0.304 | TPQ382 enolate form<br>Asp298 protonated<br>Asp298 rotated<br>His433 deprotonated<br>His431 deprotonated<br>Tyr384 OH directs to His433 |
| <b>1<sup>3-</sup></b>                          | 2.20 (1.95)  | 0.151 | His433 deprotonated<br>His431 deprotonated<br>Tyr384 OH directs to His433                                                               |
| <b>2<sup>3-</sup></b>                          | 11.32(11.21) | 0.329 | Asp298 rotated<br>His592 deprotonated<br>His431 deprotonated<br>Tyr384 OH directs to His433                                             |
| <b>3<sup>3-</sup></b>                          | 13.19(13.23) | 0.173 | His433 deprotonated<br>His431 deprotonated                                                                                              |
| <b>4<sup>3-</sup></b>                          | 20.72(21.07) | 0.332 | W(ax) deprotonated (OH(ax))<br>His433 is deprotonated<br>Tyr384 OH directs to His433                                                    |
| <b>5<sup>3-</sup></b>                          | 28.10(27.79) | 0.189 | W(ax) deprotonated (OH(ax))<br>His431 deprotonated                                                                                      |
| <b>6<sup>3-</sup></b>                          | 33.51(34.95) | 0.236 | W(ax) deprotonated (OH(ax))<br>His433 is deprotonated                                                                                   |
| <b>7<sup>3-</sup></b>                          | 37.34(39.02) | 0.299 | W(ax) deprotonated (OH(ax))<br>His592 is deprotonated                                                                                   |
| <b>8<sup>3-</sup></b>                          | 48.08(48.55) | 0.348 | Asp298 deprotonated<br>TPQ382 keto form<br>W(ax) deprotonated (OH(ax))<br>His431 deprotonated                                           |
| <b>9<sup>3-</sup></b>                          | 66.98(68.85) | 0.224 | W(ax) deprotonated (OH(ax))<br>His592 is deprotonated                                                                                   |
| <b>10<sup>3-</sup></b>                         | 69.58(75.55) | 0.520 | Asp298 deprotonated<br>TPQ382 keto form<br>W(ax) deprotonated (OH(ax))<br>His431 deprotonated<br>Asn281 side chain rotated              |

\* Free energies were calculated using  $G(i) = E(i) + \delta H(i) - T S(i)$ , where  $E(i)$  is relative energy in state  $i$ ,  $\delta H$  is the thermal energy correction to enthalpy,  $S$  is the total entropy, and  $T$  is temperature ( $T = 298.15$  K). Zero energies are taken for the states in the most stable states (**0<sup>3-</sup>**).

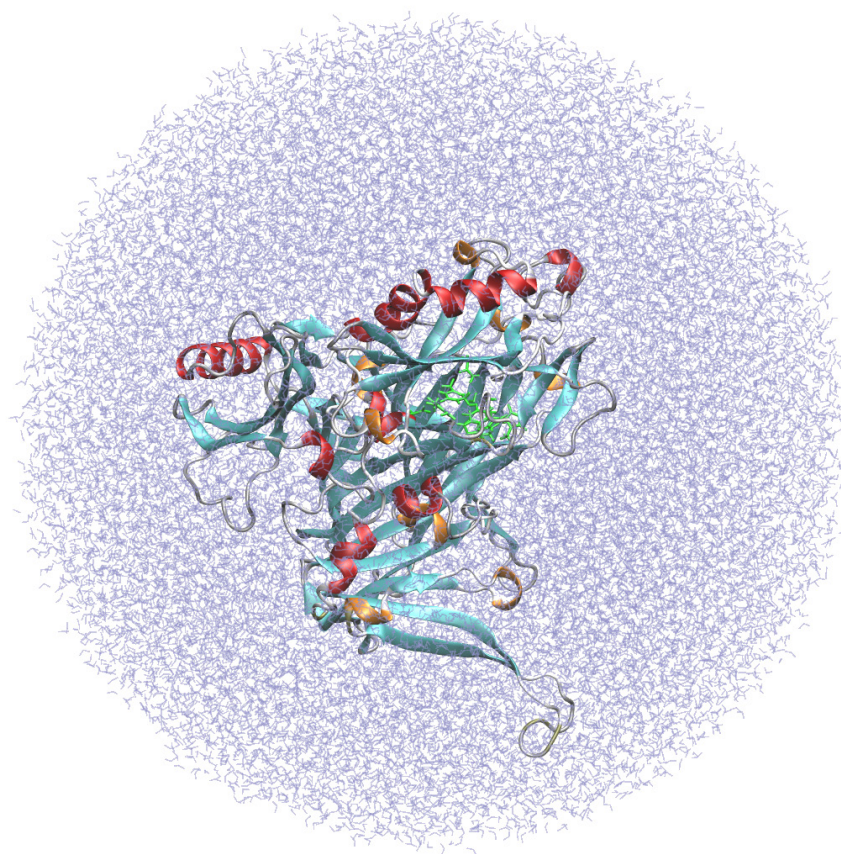

Figure S1. QM/MM whole system used in the present study. Solvent water molecules are colored blue, and CGAO is drawn in ribbon. The QM atoms in the active site are displayed in the green tube representation.

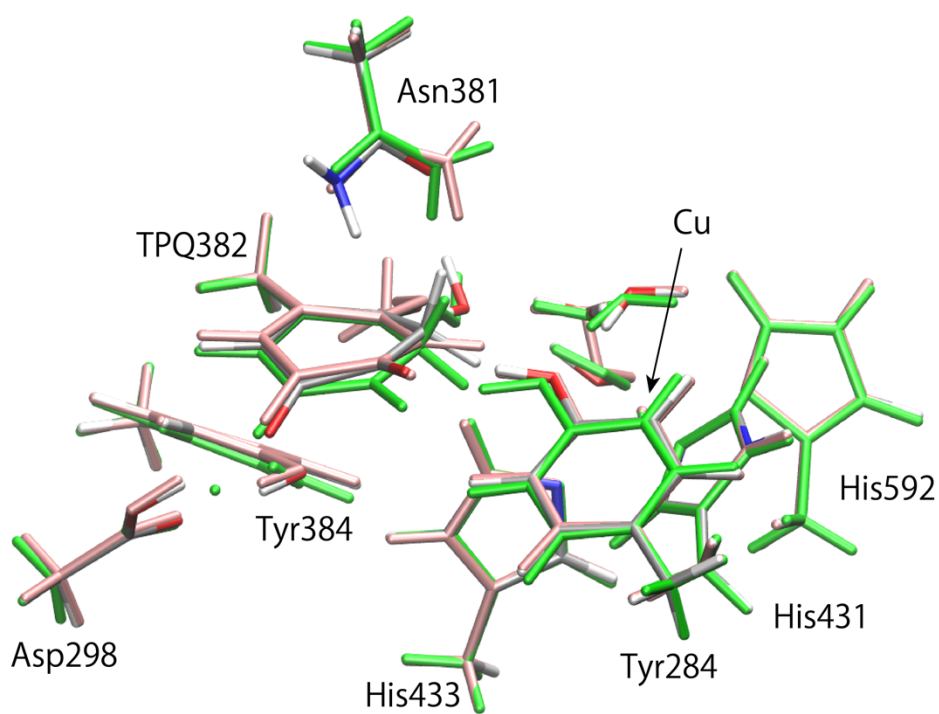

Figure S2. Superimposed view of the QM/MM optimized structures (**0** and **1**) in **Full** state compared to the ND structure. Only the atoms in the QM region are shown, and they are colored pink (**0**), by element (**1**), and green (ND).

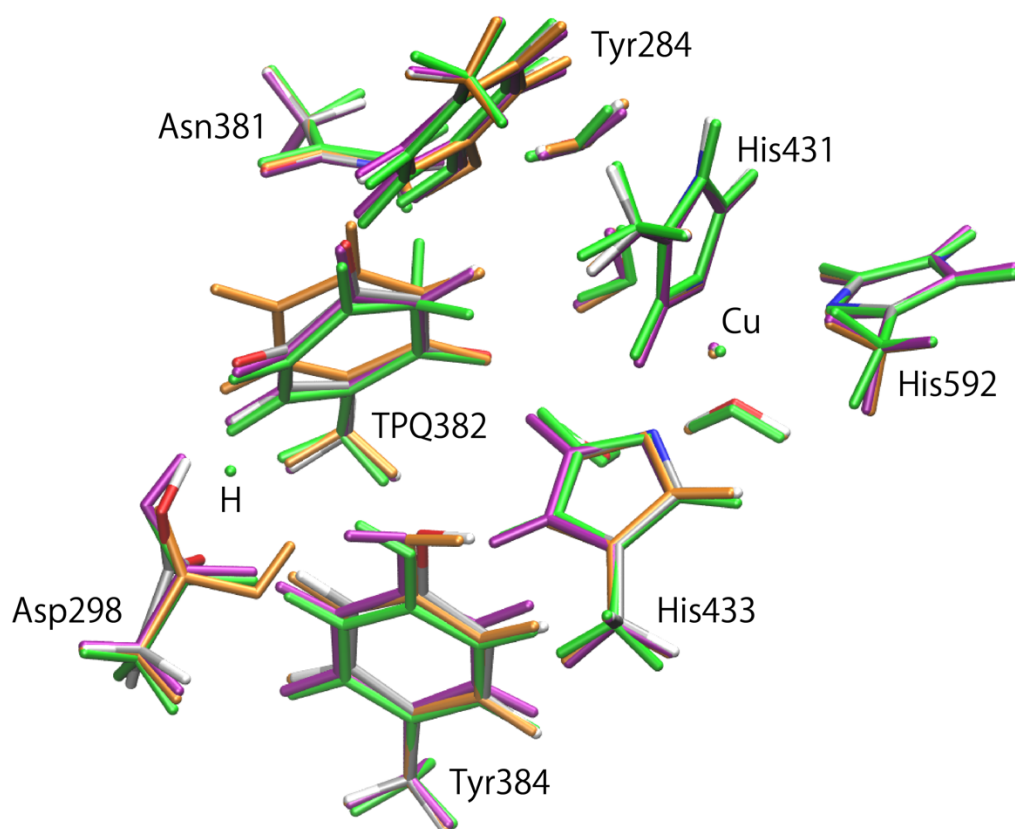

Figure S3. Superimposed view of the QM/MM optimized structures ( $0^{2-}$ ,  $1^{2-}$ , and  $2^{2-}$ ) in  $-2H^+$  state compared to the ND structure. Only the atoms in the QM region are shown, and they are colored by element ( $0^{2-}$ ), orange ( $1^{2-}$ ), purple ( $2^{2-}$ ) and green (ND).

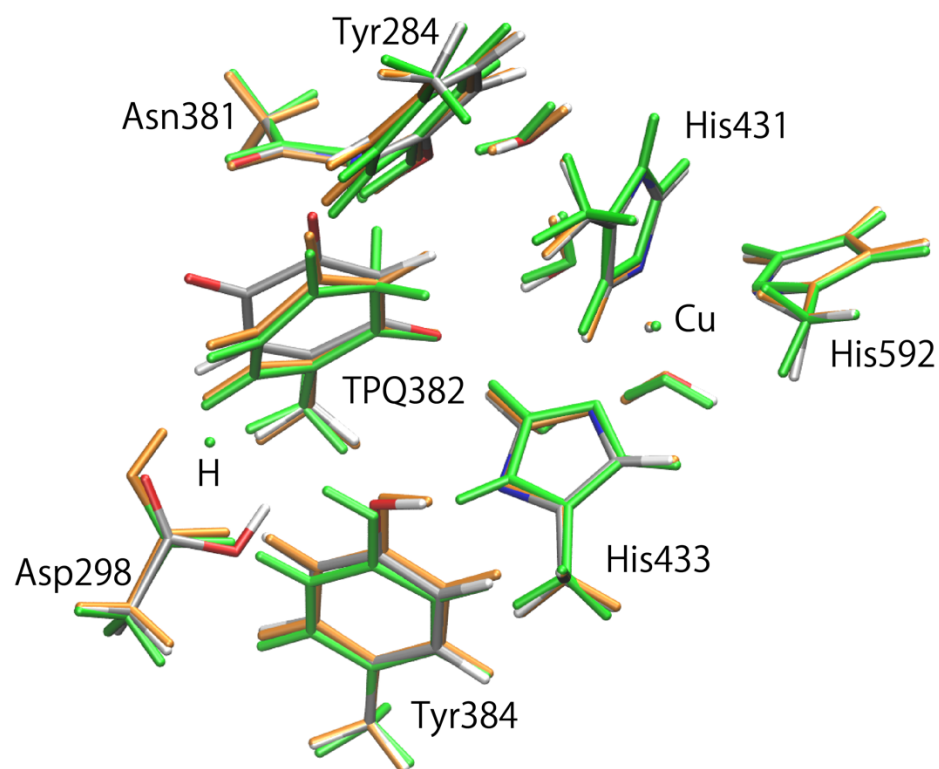

Figure S4. Superimposed view of the QM/MM optimized structures ( $0^{3-}$ ,  $1^{3-}$ ) in  $-3H^+$  state compared to the ND structure. Only the atoms in the QM region are shown, and they are colored by element ( $0^{3-}$ ), orange ( $1^{3-}$ ) and green (ND).



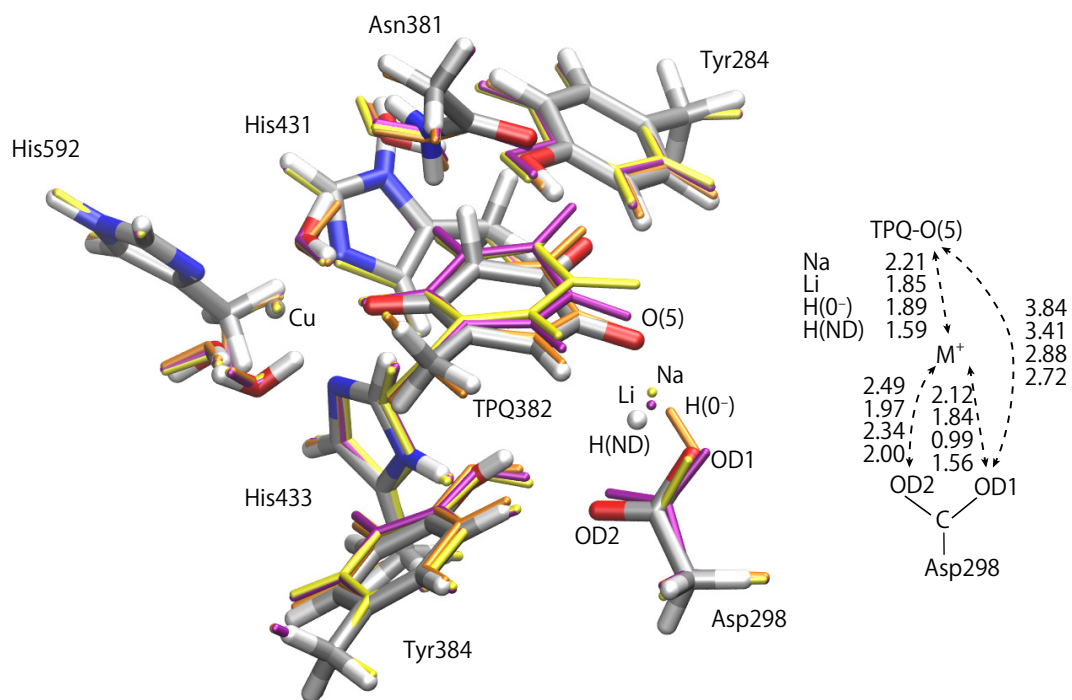

Figure S5. Superimposed view of the QM/MM optimized structures with H(0<sup>-</sup>), Li<sup>+</sup> and Na<sup>+</sup> compared to the ND structure. Only the atoms in the QM region are shown, and they are colored by element (ND), orange (H(0<sup>-</sup>)), purple (Li<sup>+</sup>) and yellow (Na<sup>+</sup>). Distances to the nearest oxygen atoms of Asp298 or TPQ are illustrated in the right panel.

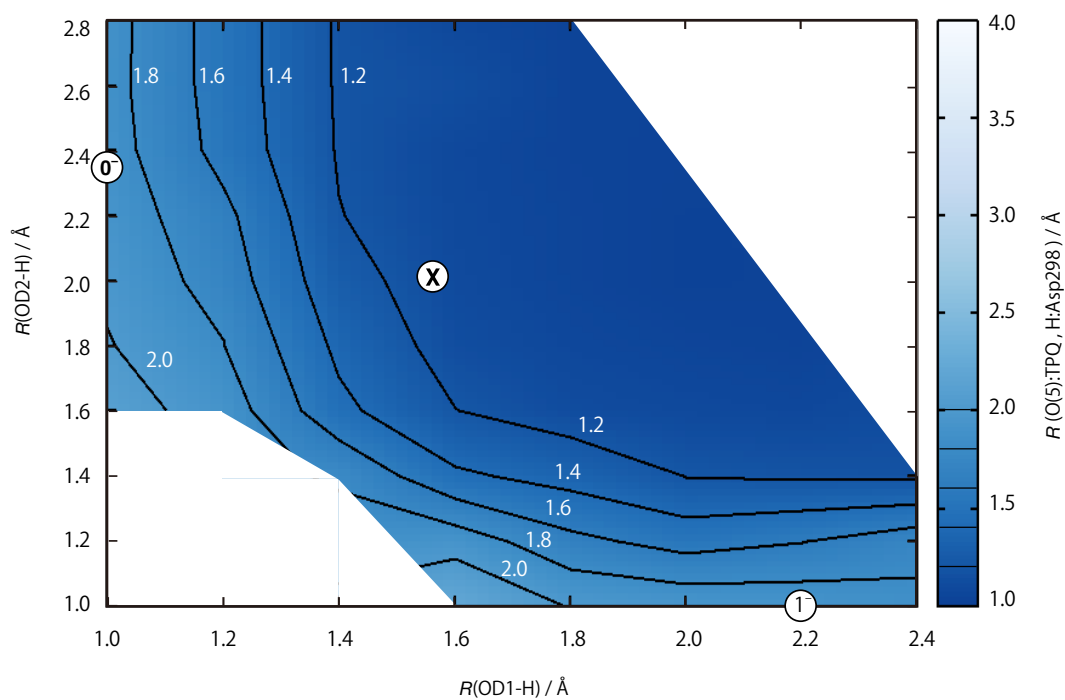

Figure S6. 2D-PES of the distance between the shared proton and O5 of TPQ ( $R(\text{O}(5):\text{TPQ}, \text{H}:\text{Asp298})$ ) in  $-\text{H}^+$  state at the QM/MM optimized structures along the  $R(\text{OD}:\text{Asp298}, \text{H})$  variables .

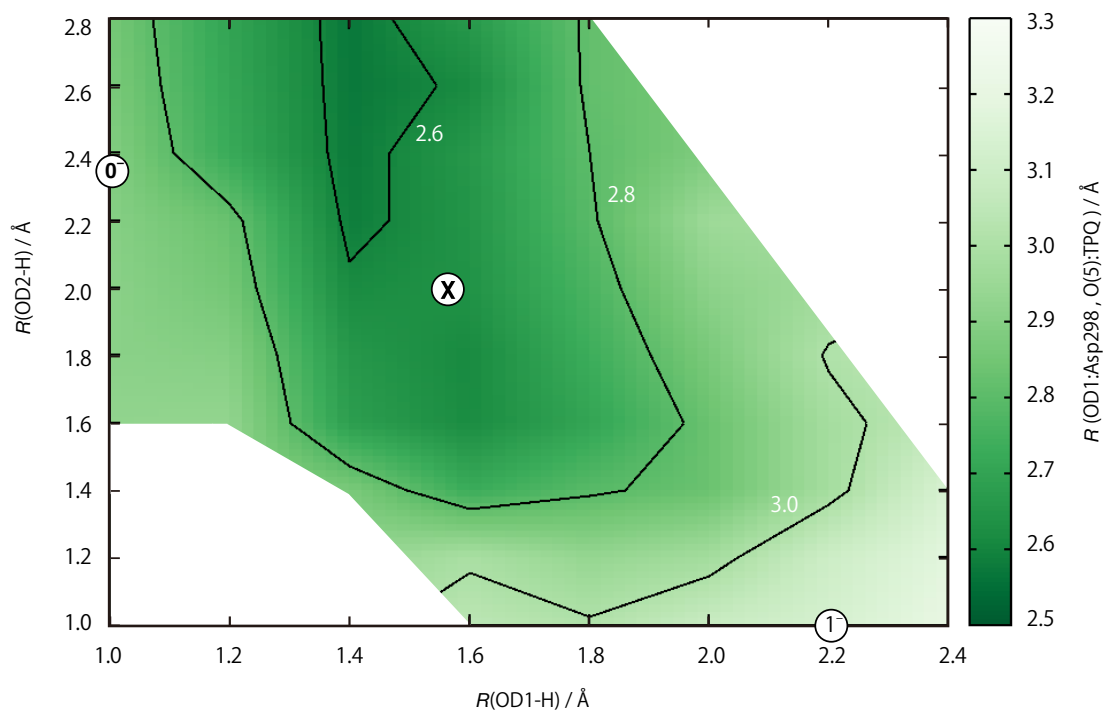

Figure S7. 2D-PES of the distance between the OD1 of Asp298 and O(5) of TPQ ( $R(\text{OD1:Asp298}, \text{O}(5):\text{TPQ})$ ) in  $-\text{H}^+$  at the QM/MM optimized structures along the  $R(\text{OD:Asp298}, \text{H})$  variables.

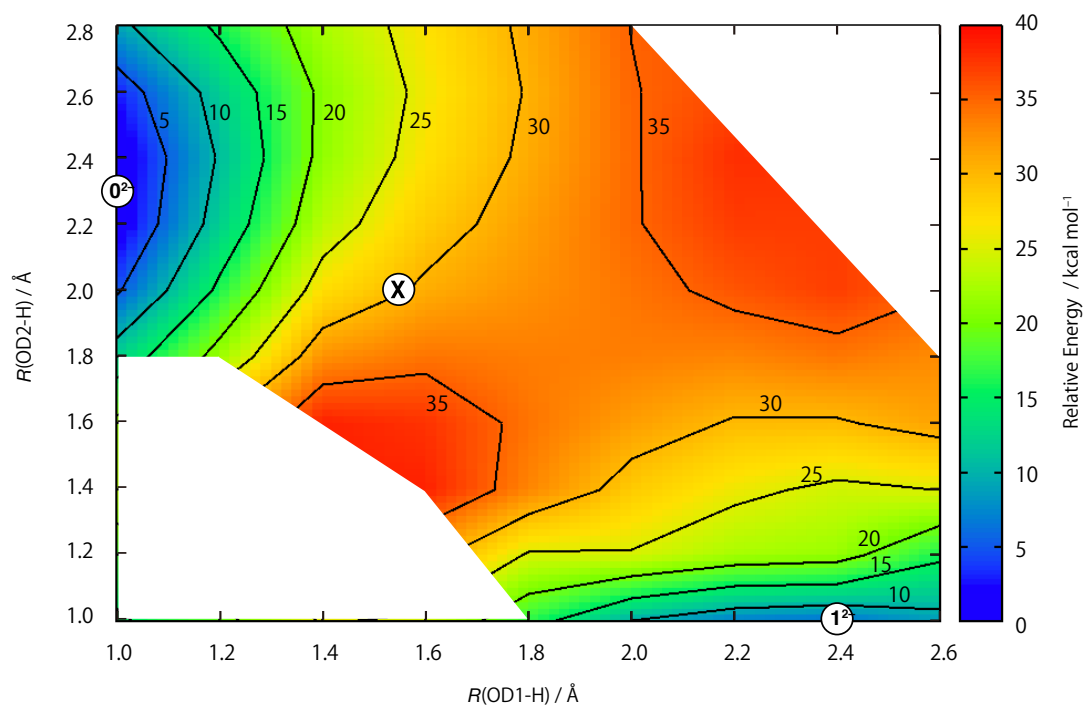

Figure S8. 2D-PES of the distal H atom along the distances between the OD atoms of Asp298 and the shared proton ( $x=d(\text{OD1}, \text{H})$ ,  $y=d(\text{OD2}, \text{H})$ ) in  $-2\text{H}^+$  state.

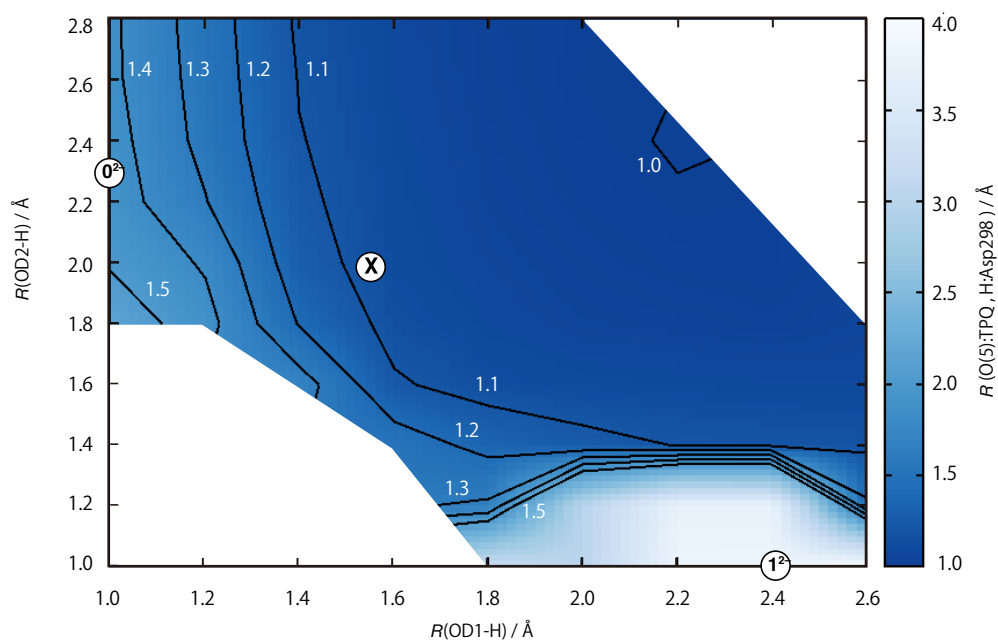

Figure S9. 2D-surface of the distance between the shared proton and O(5) of TPQ ( $R(\text{O(5):TPQ, H:Asp298})$ ) in  $-2\text{H}^+$  state at the QM/MM optimized structures along the  $R(\text{OD:Asp298, H})$  variables.

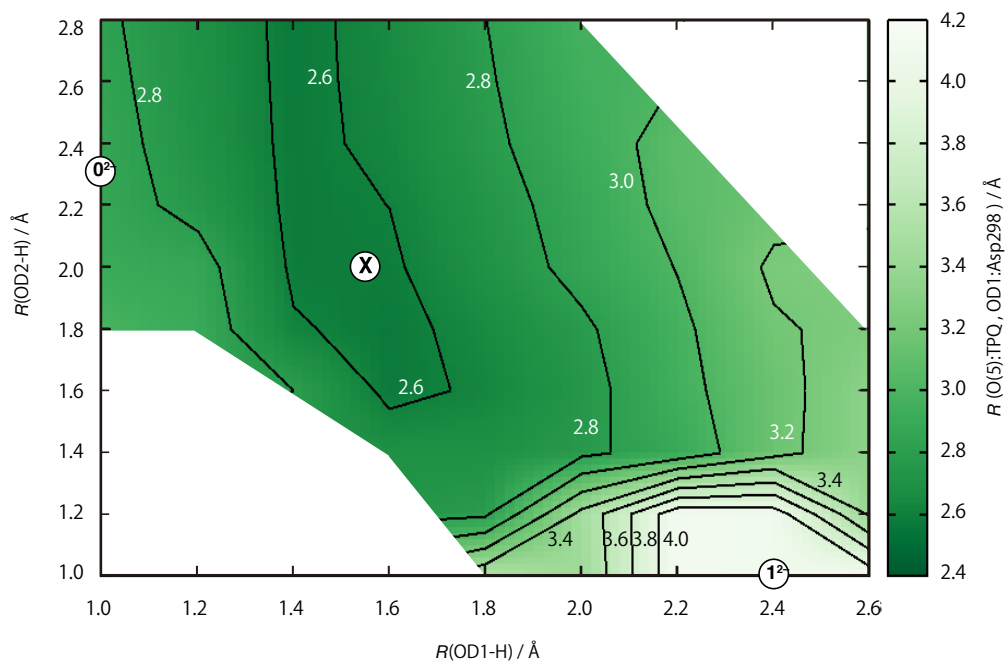

Figure S10. 2D-surface of the distance between the O(5) of TPQ and OD1 of Asp298 ( $R(\text{O(5):TPQ, OD1:Asp298})$ , OD1:Asp298,) in  $-2\text{H}^+$  at the QM/MM optimized structures along the  $R(\text{OD:Asp298, H})$  variables.

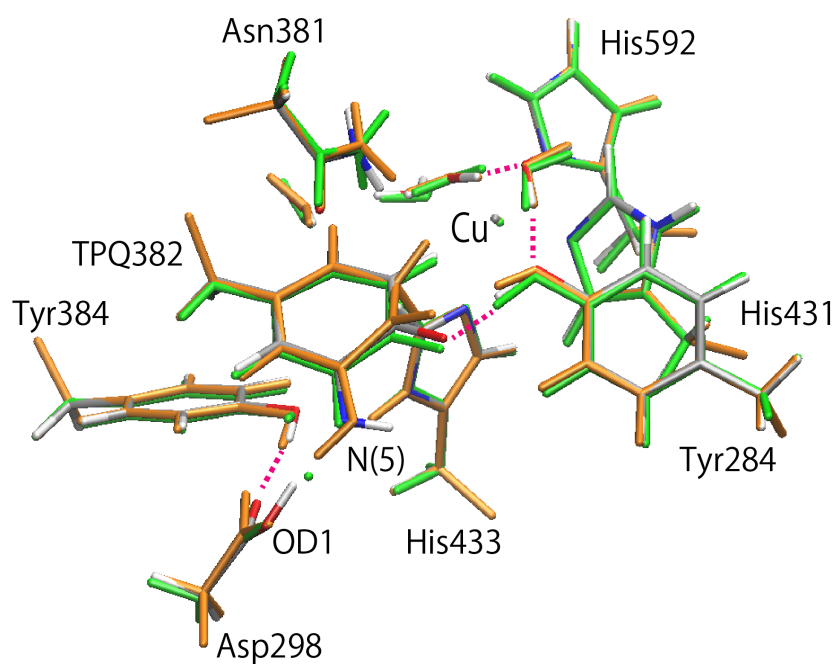

Figure S11. Superimposed view of the QM/MM optimized structures (*imq(0<sup>-</sup>)* and *imq(keto<sup>-</sup>)*) in *imq* state compared to the ND structure. Only the atoms in the QM region are shown, and they are colored by element (*imq(0<sup>-</sup>)*), orange (*imq(keto<sup>-</sup>)*) and green (ND).

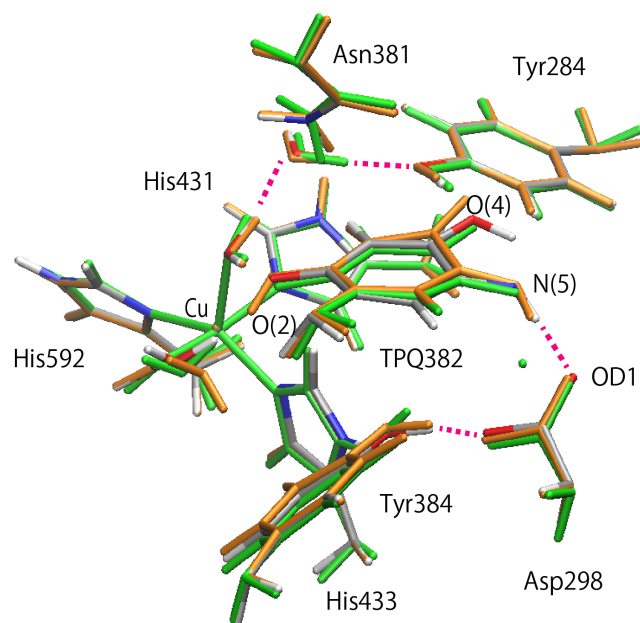

Figure S12. Superimposed view of the QM/MM optimized structures (**imq(O(2)H<sup>-</sup>**) and **imq(O(4)H<sup>-</sup>**) in **imq** state compared to the ND structure. Only the atoms in the QM region are shown, and they are colored by element (**imq(O(2)H<sup>-</sup>**), orange (**imq(O(4)H<sup>-</sup>**) and green (ND)).



## Section S2, Effect of dimerization of AGAO

The TPQ active site is buried inside one monomer subunit of the AGAO dimer. In the dimer, a segment of beta strand-loop-beta strand from the other subunit wraps the TPQ active site domain (Figure S2.1(A)), although there are no direct H-bond interactions between the TPQ active site (QM region) and the amino acid residues in the segment from the other subunit. The shortest distances to the O4:A-TPQ382 atom are 10.8 Å and 11.2 Å for Cε:B-His355 and Cε2:B-Phe470 atoms, respectively. The distance between the active site in each subunit is  $d(\text{O4:A-TPQ}, \text{O4:B-TPQ}) = 46 \text{ Å}$ . Therefore, these rather long distances suggest that the electronic interactions from another subunit do not become a dominant factor. We also remark that the heavy atoms of proteins in the MM region are all fixed to the ND structure during the MD simulations, thus ensuring the protein structure in the MM region of the monomer subunit is not denatured. One theoretical difficulty for the dimer model is that the MM force field for the TPQ in another subunit should be refined, namely because the assumed protonation state of the active site is somehow arbitrary.

In order to actually evaluate the influence in the dimerization, we constructed new dimer and monomer models. Almost all the computational procedures are followed described in the main text, but only one difference is that the annealing of MDs were carried out for longer times (10ps) in rectangular simulation boxes. After extracting spherical regions from the center of the protein, new QM/MM models are constructed as shown in Figure S2.1(B) and (C). In the dimer model, we assumed a singly protonated state ( $-\text{H}^+$ ) for TPQ in the MM region. Using these new QM/MM models, we performed QM/MM optimizations for the lowest states in four different protonation states.

Results summarized in Table S2.1 show that

1. the singly protonated state ( $0^-$ ) is the closest one to the ND structure in either QM/MM model,
2. the conformational isomers in the singly protonated state ( $1^-$ ) are in low energy states,
3. the trends of RMSD for other protonation states are qualitatively similar over the different QM/MM models and independent for the monomer/dimer models.

In conclusion, the monomer model used in the present QM/MM model is the one computationally less expensive and preferable to the scope of the present work. Moreover, the active site properties, structures and relative energies, are not dominantly influenced by the monomer/dimer model for AGAO.

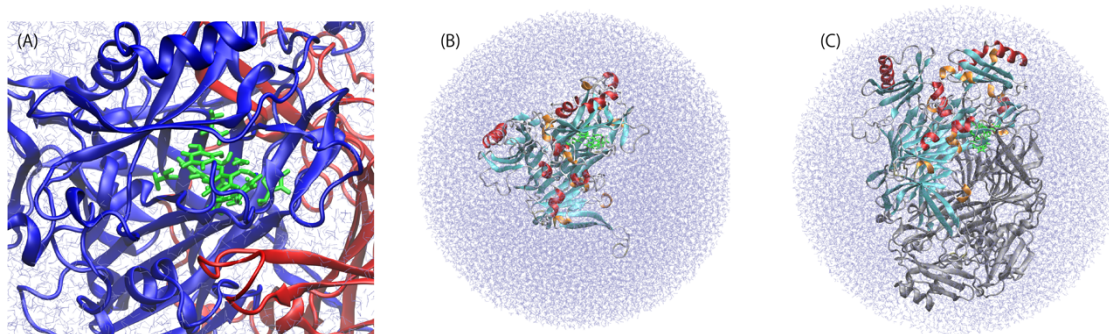

Figure S2.1 (A) Enlarged view of the active site in the dimer model, (B) newly constructed monomer model, (C) newly constructed dimer model. One monomer is colored according to the secondary structure,

and another monomer is colored gray to allow for a clearer visualization.

Table S2.1 RMSDs of the non-H atoms in the QM region from the neutron diffraction structure (PDBID: 6L9C) ( $RMSD/\text{\AA}$ ) and the relative energies ( $\Delta E/\text{kcal mol}^{-1}$ ).

| States                                         | Monomer in the main text | Monomer          | Dimer            |
|------------------------------------------------|--------------------------|------------------|------------------|
|                                                | $RMSD(\Delta E)$         | $RMSD(\Delta E)$ | $RMSD(\Delta E)$ |
| Fully protonated ( <b>Full</b> )               |                          |                  |                  |
| <b>0</b>                                       | 0.251                    | 0.247            | 0.244            |
| Deprotonated ( <b>-H<sup>+</sup></b> )         |                          |                  |                  |
| <b>0<sup>-</sup></b>                           | 0.107 (0)                | 0.1709 (0)       | 0.181 (0)        |
| <b>1<sup>-</sup></b>                           | 0.190 (7.8)              | 0.302 (2.9)      | 0.283 (4.9)      |
| Doubly deprotonated ( <b>-2H<sup>+</sup></b> ) |                          |                  |                  |
| <b>0<sup>2-</sup></b>                          | 0.238                    | 0.245            | 0.268            |
| Triply deprotonated ( <b>-3H<sup>+</sup></b> ) |                          |                  |                  |
| <b>0<sup>3-</sup></b>                          | 0.304                    | 0.394            | 0.463            |

## 0, Full

|   |             |              |              |    |             |              |              |
|---|-------------|--------------|--------------|----|-------------|--------------|--------------|
| C | 14.51678455 | -7.89663965  | -1.97511077  | C  | 2.82341080  | -2.14765151  | -4.50210360  |
| H | 14.95054944 | -8.89893830  | -1.99248162  | H  | 3.52113087  | -1.84015593  | -5.27151586  |
| H | 15.22128250 | -7.23217198  | -2.47811879  | C  | 1.51002196  | -1.69237308  | -4.50860219  |
| C | 13.16916918 | -7.95333426  | -2.65817522  | H  | 1.18362383  | -1.03377685  | -5.30887984  |
| C | 12.53957396 | -6.83131552  | -3.21286031  | C  | 10.51660545 | -8.43711236  | 0.08129971   |
| H | 13.04458860 | -5.86877090  | -3.21477099  | H  | 11.27880307 | -8.84100360  | -0.58458856  |
| C | 11.24827564 | -6.92065038  | -3.72912033  | H  | 10.51502575 | -7.35534913  | -0.07708761  |
| H | 10.76125658 | -6.04214065  | -4.13707526  | C  | 9.17177103  | -8.98351581  | -0.24852973  |
| C | 10.56739399 | -8.14497183  | -3.70578966  | N  | 8.92287484  | -10.30943796 | -0.57269633  |
| O | 9.27972179  | -8.25964430  | -4.16350930  | H  | 9.62458766  | -11.03845152 | -0.69863682  |
| H | 9.08455973  | -7.50337347  | -4.78206353  | C  | 7.59178292  | -10.47612063 | -0.70405940  |
| C | 11.19080181 | -9.28254506  | -3.19469150  | H  | 7.11169604  | -11.40505616 | -0.95946115  |
| H | 10.65390530 | -10.22644664 | -3.19286198  | N  | 6.97152651  | -9.32339297  | -0.49235398  |
| C | 12.47599735 | -9.16984236  | -2.66961150  | C  | 7.94346969  | -8.38344960  | -0.21654511  |
| H | 12.94431909 | -10.02405469 | -2.19237872  | H  | 7.70009117  | -7.35797406  | 0.00514974   |
| C | 5.95151276  | 1.22004777   | -5.08269957  | C  | 5.14835226  | -3.80656628  | 1.42702136   |
| H | 5.01133716  | 1.34343916   | -5.62667053  | H  | 4.72022355  | -2.93229206  | 0.92249813   |
| H | 5.75470650  | 1.42948151   | -4.02744825  | H  | 4.46220424  | -4.07226522  | 2.23575519   |
| C | 6.34696359  | -0.26494500  | -5.19268695  | C  | 5.23742228  | -4.96399904  | 0.48544159   |
| O | 5.69762407  | -1.11336147  | -4.58938133  | N  | 5.23736333  | -4.85834563  | -0.89522621  |
| O | 7.35490757  | -0.58453345  | -5.99828526  | H  | 5.20402658  | -4.01480076  | -1.46773929  |
| H | 7.48598465  | -1.56345503  | -6.00713330  | C  | 5.21902874  | -6.10165498  | -1.42473487  |
| C | 5.27294754  | -8.66442537  | -9.72775120  | H  | 5.19150789  | -6.29875934  | -2.48264440  |
| H | 6.02712781  | -8.81631651  | -10.50121901 | N  | 5.20976836  | -7.00726895  | -0.45798614  |
| H | 4.83725672  | -9.63784314  | -9.49952551  | C  | 5.21987445  | -6.31309128  | 0.73580230   |
| C | 5.97505627  | -8.04087690  | -8.50515150  | H  | 5.21397262  | -6.82032165  | 1.68978190   |
| O | 6.45743224  | -6.90954165  | -8.50028541  | C  | 5.96151124  | -10.23323421 | 2.56689617   |
| N | 6.05986832  | -8.87240550  | -7.43057876  | H  | 6.81441986  | -9.85995174  | 1.99443681   |
| H | 6.42100635  | -8.46790625  | -6.57723092  | H  | 5.34083854  | -9.36391854  | 2.82686734   |
| H | 5.38901035  | -9.63277330  | -7.34491844  | C  | 5.12586123  | -11.16282613 | 1.72228411   |
| C | 3.38551962  | -4.80805982  | -6.42210605  | N  | 4.67665553  | -10.78725650 | 0.45389193   |
| H | 3.36476446  | -3.83803913  | -6.92356603  | C  | 3.90300444  | -11.77137236 | -0.00056380  |
| H | 2.80897497  | -4.68917866  | -5.50111940  | H  | 3.38042344  | -11.77438804 | -0.94481307  |
| C | 4.81667371  | -5.11650395  | -6.10182211  | N  | 3.83067510  | -12.76135532 | 0.90138695   |
| C | 5.21209991  | -6.23663048  | -5.20362318  | H  | 3.33324997  | -13.65545263 | 0.76981168   |
| O | 4.29216604  | -6.98123365  | -4.57698128  | C  | 4.58882714  | -12.39797765 | 1.99467433   |
| C | 6.52291128  | -6.56877339  | -5.00507921  | H  | 4.63738914  | -13.01629617 | 2.87903274   |
| H | 6.77953177  | -7.40772407  | -4.36500618  | Cu | 4.99171201  | -9.03944642  | -0.54777138  |
| H | 3.38184362  | -6.56819656  | -4.41614066  | O  | 7.38453780  | -10.23015528 | -3.77280809  |
| C | 7.57720792  | -5.81181675  | -5.62496669  | H  | 7.89501154  | -11.00640915 | -3.42786904  |
| O | 8.76285555  | -6.14825690  | -5.63745414  | H  | 8.06976673  | -9.52694609  | -3.86448391  |
| C | 7.17130170  | -4.43843203  | -6.18668619  | O  | 2.96536212  | -8.75608755  | -0.72568975  |
| O | 7.97096325  | -3.51290250  | -6.20747104  | H  | 2.61743857  | -9.13820910  | -1.55471104  |
| C | 5.77217676  | -4.28075756  | -6.55890084  | H  | 2.37077138  | -9.14357112  | 0.00818006   |
| H | 5.53083202  | -3.41575124  | -7.16305406  | O  | 4.98301957  | -9.31706456  | -2.78467475  |
| C | -0.76255178 | -1.41254733  | -3.45753259  | H  | 4.75340712  | -8.56572590  | -3.36334702  |
| H | -1.02399500 | -1.15406853  | -2.42290124  | H  | 5.86580565  | -9.64819965  | -3.09725793  |
| H | -0.74786877 | -0.47490122  | -4.02152957  | O  | 1.96046133  | -6.26291294  | -3.72059354  |
| C | 0.60830813  | -2.04106361  | -3.49564590  | H  | 1.23030766  | -6.78192882  | -4.14477114  |
| C | 1.05533560  | -2.90679150  | -2.49134899  | H  | 1.64858725  | -5.34470006  | -3.63516260  |
| H | 0.37736341  | -3.18770128  | -1.68856294  | C  | 14.38916956 | -7.43765933  | -0.51369988  |
| C | 2.37337397  | -3.37128439  | -2.46356736  | C  | 6.99596014  | 2.23724852   | -5.62156476  |
| H | 2.72188936  | -4.00923215  | -1.65632147  | C  | 4.17201602  | -7.73719604  | -10.29445683 |
| C | 3.27130906  | -2.95694618  | -3.45307578  | C  | 2.65670241  | -5.83051907  | -7.32726425  |
| O | 4.57762869  | -3.37274895  | -3.37861461  | C  | -1.88314104 | -2.29830870  | -4.02843756  |
| H | 5.13243123  | -2.71523661  | -3.85842417  | C  | 10.94038660 | -8.74438910  | 1.53758595   |
|   |             |              |              | C  | 6.50300572  | -3.40368329  | 2.05654156   |
|   |             |              |              | C  | 6.47869923  | -10.83959860 | 3.86963647   |

|         |             |              |              |    |             |              |              |
|---------|-------------|--------------|--------------|----|-------------|--------------|--------------|
| 1, Full |             |              |              | C  | 2.82485594  | -2.16771381  | -4.44997868  |
| C       | 14.53230681 | -7.88811508  | -1.97540369  | H  | 3.53493771  | -1.87196408  | -5.21313706  |
| H       | 14.95580477 | -8.89393407  | -1.99292344  | C  | 1.51273232  | -1.70828903  | -4.48168833  |
| H       | 15.24778128 | -7.22689527  | -2.46514167  | H  | 1.19491579  | -1.06506311  | -5.29863478  |
| C       | 13.19339304 | -7.92911841  | -2.67367548  | C  | 10.51322422 | -8.45012734  | 0.07713569   |
| C       | 12.56291757 | -6.79616171  | -3.20485894  | H  | 11.27491157 | -8.86014425  | -0.58610934  |
| H       | 13.05849682 | -5.82956327  | -3.17888246  | H  | 10.51418150 | -7.36926337  | -0.08695407  |
| C       | 11.27436922 | -6.88196759  | -3.72879895  | C  | 9.16591070  | -8.99563963  | -0.25057973  |
| H       | 10.77968767 | -5.99215685  | -4.10228000  | N  | 8.91170238  | -10.32157910 | -0.57473123  |
| C       | 10.60316959 | -8.10939767  | -3.73702835  | H  | 9.60995844  | -11.05280059 | -0.70340075  |
| O       | 9.31034513  | -8.22385520  | -4.19195949  | C  | 7.57803857  | -10.48167838 | -0.70202362  |
| H       | 9.13501293  | -7.52373800  | -4.85926331  | H  | 7.09305476  | -11.40758618 | -0.96014721  |
| C       | 11.22943343 | -9.25824954  | -3.25628642  | N  | 6.96014707  | -9.32998295  | -0.48769838  |
| H       | 10.69991911 | -10.20516506 | -3.27971641  | C  | 7.93831257  | -8.39482699  | -0.21268732  |
| C       | 12.50854416 | -9.14914592  | -2.71910508  | H  | 7.69925492  | -7.36940658  | 0.01531789   |
| H       | 12.98416458 | -10.01112177 | -2.26531270  | C  | 5.14532964  | -3.80719325  | 1.43514926   |
| C       | 5.94384485  | 1.23742929   | -5.07014676  | H  | 4.71509011  | -2.93394647  | 0.93148612   |
| H       | 5.00786056  | 1.35360665   | -5.62340431  | H  | 4.46460685  | -4.07632187  | 2.24643183   |
| H       | 5.73662642  | 1.47152083   | -4.02290514  | C  | 5.23301733  | -4.96394877  | 0.49248781   |
| C       | 6.34389722  | -0.24480899  | -5.14012665  | N  | 5.19628520  | -4.85489887  | -0.88660132  |
| O       | 5.71716009  | -1.08394313  | -4.50347833  | H  | 5.11197267  | -4.01388597  | -1.45902361  |
| O       | 7.34071576  | -0.58251885  | -5.95706395  | C  | 5.20087857  | -6.10032343  | -1.41278864  |
| H       | 7.48697857  | -1.55609584  | -5.90219421  | H  | 5.12076351  | -6.31121158  | -2.46426627  |
| C       | 5.28687077  | -8.68067242  | -9.73919805  | N  | 5.24691513  | -7.00437831  | -0.44904165  |
| H       | 5.97216933  | -8.91094563  | -10.55608389 | C  | 5.25993203  | -6.31301725  | 0.74335172   |
| H       | 4.81648872  | -9.60310989  | -9.40638798  | H  | 5.28135618  | -6.82507878  | 1.69480276   |
| C       | 6.05913190  | -8.10262555  | -8.54321898  | C  | 5.95842390  | -10.23090504 | 2.57077548   |
| O       | 5.88386350  | -8.50635297  | -7.39598033  | H  | 6.81188267  | -9.86335240  | 1.99458333   |
| N       | 6.92941057  | -7.07130386  | -8.78406131  | H  | 5.34141294  | -9.36037213  | 2.83158157   |
| H       | 7.53255530  | -6.82079988  | -8.01047945  | C  | 5.11841881  | -11.15769101 | 1.73001330   |
| H       | 7.39395316  | -6.90181465  | -9.67699937  | N  | 4.65483548  | -10.77165248 | 0.47139066   |
| C       | 3.35787336  | -4.80918383  | -6.40504852  | C  | 3.87550922  | -11.74907448 | 0.01548912   |
| H       | 3.31835551  | -3.83098927  | -6.88792054  | H  | 3.33944856  | -11.72910239 | -0.92031004  |
| H       | 2.79157183  | -4.72847122  | -5.47028679  | N  | 3.81560358  | -12.74956318 | 0.90810503   |
| C       | 4.77439909  | -5.11571103  | -6.07309075  | H  | 3.32216860  | -13.64408047 | 0.77305020   |
| C       | 5.09636305  | -6.26222677  | -5.17297079  | C  | 4.58738273  | -12.39697886 | 1.99657921   |
| O       | 4.22583107  | -6.82417223  | -4.51725700  | H  | 4.64474143  | -13.02140754 | 2.87646996   |
| C       | 6.51380417  | -6.75675828  | -5.12805689  | Cu | 4.96959129  | -9.03465302  | -0.54329740  |
| H       | 6.51562548  | -7.60579949  | -5.85064609  | O  | 7.41259268  | -10.21092231 | -3.77797377  |
| H       | 6.76932979  | -7.17416372  | -4.14706381  | H  | 7.89448030  | -10.99761838 | -3.42300987  |
| C       | 7.56091446  | -5.78577234  | -5.58813816  | H  | 8.10615457  | -9.52109695  | -3.86021106  |
| O       | 8.73152047  | -6.10407550  | -5.72760400  | O  | 3.01841753  | -8.65809381  | -0.61257391  |
| C       | 7.12666623  | -4.36866448  | -5.96820530  | H  | 2.56974280  | -8.36382237  | -1.44493003  |
| O       | 7.92417686  | -3.44328250  | -5.92964973  | H  | 2.35981835  | -9.12090604  | 0.00000276   |
| C       | 5.74659333  | -4.23216465  | -6.40119848  | O  | 5.03569958  | -9.30446044  | -2.74788427  |
| H       | 5.51344441  | -3.32752547  | -6.95242183  | H  | 4.62263732  | -8.68142576  | -3.36919016  |
| C       | -0.76631327 | -1.40905089  | -3.45568405  | H  | 5.90519048  | -9.58946296  | -3.12381488  |
| H       | -1.03797270 | -1.14045688  | -2.42670333  | O  | 1.99069017  | -7.43320438  | -2.86190810  |
| H       | -0.74594237 | -0.47734556  | -4.02915244  | H  | 1.30003422  | -7.66449383  | -3.51921299  |
| C       | 0.60494422  | -2.03830770  | -3.46990814  | H  | 2.64256799  | -6.94143853  | -3.38531849  |
| C       | 1.03854259  | -2.88693569  | -2.44513112  | C  | 14.39138004 | -7.43846988  | -0.51422723  |
| H       | 0.35049847  | -3.14702156  | -1.64458635  | C  | 6.99605566  | 2.24089701   | -5.61993446  |
| C       | 2.34873278  | -3.36156405  | -2.39831725  | C  | 4.19409459  | -7.72356203  | -10.28479744 |
| H       | 2.67915039  | -3.99671085  | -1.58275713  | C  | 2.64493678  | -5.83562890  | -7.31384381  |
| C       | 3.25267249  | -2.96498114  | -3.38522709  | C  | -1.88148991 | -2.29952553  | -4.02726648  |
| O       | 4.57200656  | -3.36673945  | -3.29446835  | C  | 10.93959164 | -8.74774919  | 1.53625382   |
| H       | 5.11852372  | -2.66027845  | -3.70488943  | C  | 6.50286417  | -3.40225047  | 2.05769965   |
|         |             |              |              | C  | 6.47779061  | -10.84029310 | 3.87065415   |

## 2, Full

|   |             |              |              |    |             |              |              |
|---|-------------|--------------|--------------|----|-------------|--------------|--------------|
| C | 14.52813382 | -7.89796765  | -1.97298936  | C  | 2.84944948  | -2.08126457  | -4.51382587  |
| H | 14.93839008 | -8.91072576  | -1.98474984  | H  | 3.56708247  | -1.69426266  | -5.22657121  |
| H | 15.25708906 | -7.25196125  | -2.46342232  | C  | 1.54263706  | -1.60365142  | -4.49136874  |
| C | 13.19292148 | -7.91928021  | -2.68022392  | H  | 1.24369707  | -0.85182485  | -5.21642232  |
| C | 12.61825712 | -6.78130414  | -3.26296609  | C  | 10.51278288 | -8.44389106  | 0.08116253   |
| H | 13.15260117 | -5.83512290  | -3.25484559  | H  | 11.27332723 | -8.85236133  | -0.58406781  |
| C | 11.33895348 | -6.83592314  | -3.81465732  | H  | 10.51438864 | -7.36240513  | -0.07999486  |
| H | 10.88494920 | -5.94273512  | -4.22789117  | C  | 9.16464141  | -8.98669141  | -0.24764741  |
| C | 10.62465645 | -8.03694107  | -3.80245736  | N  | 8.90502404  | -10.31379641 | -0.56199925  |
| O | 9.33679298  | -8.11485989  | -4.28896765  | H  | 9.59964928  | -11.05193126 | -0.67089080  |
| H | 9.23423415  | -7.52420620  | -5.06937899  | C  | 7.57110998  | -10.46724364 | -0.70146364  |
| C | 11.19035186 | -9.18877849  | -3.26080999  | H  | 7.08191096  | -11.39507562 | -0.94504584  |
| H | 10.62216786 | -10.11433422 | -3.26153231  | N  | 6.96013541  | -9.30827552  | -0.50483371  |
| C | 12.46177319 | -9.11395181  | -2.69853828  | C  | 7.94016978  | -8.37625190  | -0.23006722  |
| H | 12.88923152 | -9.98281547  | -2.20916887  | H  | 7.70463194  | -7.34639017  | -0.01950714  |
| C | 5.95957220  | 1.21376696   | -5.08481977  | C  | 5.15038113  | -3.80575978  | 1.42143066   |
| H | 5.01958321  | 1.32842808   | -5.63197088  | H  | 4.71302641  | -2.92491816  | 0.93753870   |
| H | 5.75460292  | 1.42406505   | -4.03211525  | H  | 4.46909158  | -4.09593728  | 2.22585177   |
| C | 6.37656283  | -0.26502861  | -5.19000021  | C  | 5.24326200  | -4.93917389  | 0.44821689   |
| O | 5.77208789  | -1.12528455  | -4.56072061  | N  | 5.13206016  | -4.80625091  | -0.92545465  |
| O | 7.36364169  | -0.57128820  | -6.03109236  | H  | 5.03973443  | -3.95540824  | -1.47872598  |
| H | 7.50669257  | -1.54592978  | -6.03367268  | C  | 5.12478911  | -6.04066954  | -1.48006324  |
| C | 5.27413403  | -8.66170863  | -9.72275545  | H  | 4.98382731  | -6.22201786  | -2.53248583  |
| H | 6.04363790  | -8.79469634  | -10.48781109 | N  | 5.23493278  | -6.96356734  | -0.53830890  |
| H | 4.83939997  | -9.64252146  | -9.52416321  | C  | 5.30303982  | -6.29397013  | 0.66536761   |
| C | 5.95790245  | -8.08280076  | -8.46820289  | H  | 5.37506530  | -6.82384010  | 1.60432422   |
| O | 6.36645144  | -6.92548884  | -8.35654633  | C  | 5.96470796  | -10.22561782 | 2.56568146   |
| N | 6.13979631  | -9.00687657  | -7.49071421  | H  | 6.82147799  | -9.85267528  | 1.99750686   |
| H | 6.58646340  | -8.71107871  | -6.63578583  | H  | 5.34888294  | -9.35413094  | 2.82891425   |
| H | 5.49581847  | -9.79253508  | -7.43166387  | C  | 5.12474961  | -11.14479548 | 1.71260155   |
| C | 3.39597803  | -4.84183592  | -6.39801321  | N  | 4.65075700  | -10.74395512 | 0.45960003   |
| H | 3.32144787  | -3.84303404  | -6.83323481  | C  | 3.87217034  | -11.71982061 | -0.00219280  |
| H | 2.87701449  | -4.81070125  | -5.43268442  | H  | 3.32699927  | -11.69170026 | -0.93322630  |
| C | 4.83927195  | -5.14879465  | -6.17144604  | N  | 3.82514706  | -12.73412661 | 0.87668034   |
| C | 5.21630246  | -6.31686723  | -5.34029333  | H  | 3.32619242  | -13.62724135 | 0.74553385   |
| O | 4.37993856  | -7.05837311  | -4.82593402  | C  | 4.60255377  | -12.39011928 | 1.96407941   |
| C | 6.68056329  | -6.55288520  | -5.01713685  | H  | 4.67383839  | -13.02766770 | 2.83281619   |
| H | 6.88305069  | -7.62240065  | -4.94190558  | Cu | 4.96899618  | -9.01084071  | -0.57721635  |
| H | 6.82586246  | -6.15299680  | -4.00097351  | O  | 7.49824186  | -10.14644559 | -3.82345897  |
| C | 7.67044020  | -5.83575529  | -5.90636863  | H  | 7.97801284  | -10.93604338 | -3.46733342  |
| O | 8.77644734  | -6.26481210  | -6.16897933  | H  | 8.18499418  | -9.44600605  | -3.88513984  |
| C | 7.21671061  | -4.43146136  | -6.31199844  | O  | 3.01071829  | -8.63684562  | -0.64895290  |
| O | 8.00719578  | -3.49888527  | -6.32077089  | H  | 2.57598612  | -8.33799682  | -1.48418925  |
| C | 5.79225135  | -4.27766154  | -6.58060960  | H  | 2.35516982  | -9.10381417  | -0.03984848  |
| H | 5.51937852  | -3.37016154  | -7.10541016  | O  | 5.06296805  | -9.37793879  | -2.79228527  |
| C | -0.75155887 | -1.42207838  | -3.46439181  | H  | 4.72267399  | -8.70807143  | -3.40975566  |
| H | -0.99397300 | -1.18223663  | -2.42021525  | H  | 5.97258994  | -9.61300532  | -3.10135973  |
| H | -0.74821193 | -0.47451760  | -4.01224102  | O  | 2.11939492  | -7.37867194  | -3.01292285  |
| C | 0.61894033  | -2.05249466  | -3.54082961  | H  | 1.34183405  | -7.56547229  | -3.58353728  |
| C | 1.03245634  | -3.04221962  | -2.64185198  | H  | 2.80051805  | -7.11696586  | -3.65368935  |
| H | 0.33260597  | -3.40663399  | -1.89646356  | C  | 14.39005387 | -7.43896886  | -0.51325171  |
| C | 2.33404694  | -3.53941920  | -2.65191323  | C  | 6.99768072  | 2.23788628   | -5.62189081  |
| H | 2.63787907  | -4.30847066  | -1.94901599  | C  | 4.17740879  | -7.72804396  | -10.28758186 |
| C | 3.25689275  | -3.01917495  | -3.56156592  | C  | 2.64850336  | -5.83529958  | -7.31617048  |
| O | 4.56679977  | -3.46231555  | -3.50637564  | C  | -1.88162062 | -2.30039813  | -4.02835805  |
| H | 5.12803976  | -2.75935207  | -3.90350800  | C  | 10.94046249 | -8.74743076  | 1.53701736   |
|   |             |              |              | C  | 6.50296685  | -3.40308929  | 2.05665990   |
|   |             |              |              | C  | 6.47772241  | -10.83919261 | 3.86696261   |

## 3, Full

|   |             |              |              |    |             |              |              |
|---|-------------|--------------|--------------|----|-------------|--------------|--------------|
| C | 14.53295530 | -7.89010394  | -1.97163565  | C  | 2.83333135  | -2.12419552  | -4.51039474  |
| H | 14.96154545 | -8.89427499  | -1.98700840  | H  | 3.53917508  | -1.78037920  | -5.25732198  |
| H | 15.24502716 | -7.22778142  | -2.46509997  | C  | 1.52566731  | -1.65029641  | -4.49584857  |
| C | 13.19415461 | -7.94107084  | -2.66430996  | H  | 1.21147480  | -0.94091002  | -5.25739710  |
| C | 12.57168887 | -6.81141822  | -3.21202791  | C  | 10.51157614 | -8.44436614  | 0.08114271   |
| H | 13.07341886 | -5.84817726  | -3.19178456  | H  | 11.27475720 | -8.84989626  | -0.58283786  |
| C | 11.28311289 | -6.90116647  | -3.73389066  | H  | 10.50700170 | -7.36281471  | -0.07925334  |
| H | 10.78214565 | -6.01845024  | -4.11643788  | C  | 9.16582489  | -8.99255537  | -0.24893164  |
| C | 10.61395602 | -8.12728120  | -3.73200562  | N  | 8.90920630  | -10.32048597 | -0.56258293  |
| O | 9.32768760  | -8.23410065  | -4.21802746  | H  | 9.60444236  | -11.05786456 | -0.66994606  |
| H | 9.23903337  | -7.64462819  | -4.99070610  | C  | 7.57536172  | -10.47590413 | -0.70294542  |
| C | 11.22250449 | -9.26869638  | -3.21934912  | H  | 7.08817390  | -11.40444609 | -0.94714034  |
| H | 10.68169906 | -10.20992030 | -3.21844299  | N  | 6.96186883  | -9.31851362  | -0.50741620  |
| C | 12.49968715 | -9.15695749  | -2.67805386  | C  | 7.93998661  | -8.38532068  | -0.23159258  |
| H | 12.96654879 | -10.01080512 | -2.20005488  | H  | 7.70081554  | -7.35629398  | -0.02042402  |
| C | 5.96965664  | 1.20299135   | -5.09482479  | C  | 5.14689218  | -3.80449321  | 1.43071601   |
| H | 5.02495616  | 1.32687228   | -5.63180861  | H  | 4.70876407  | -2.92603546  | 0.94262755   |
| H | 5.77666440  | 1.39480858   | -4.03648026  | H  | 4.46893204  | -4.08869795  | 2.24006389   |
| C | 6.38253296  | -0.27192375  | -5.23338042  | C  | 5.23929245  | -4.94431691  | 0.47038410   |
| O | 5.78742902  | -1.15371691  | -4.63305867  | N  | 5.19996677  | -4.81781830  | -0.90751634  |
| O | 7.37644672  | -0.55428895  | -6.08813322  | H  | 5.12946708  | -3.96992519  | -1.46720086  |
| H | 7.49031488  | -1.52388715  | -6.12827084  | C  | 5.20428126  | -6.05432378  | -1.45531751  |
| C | 5.26287260  | -8.67997849  | -9.74437168  | H  | 5.14011454  | -6.23997047  | -2.51389125  |
| H | 5.99048760  | -8.85311211  | -10.53873981 | N  | 5.24928173  | -6.97187722  | -0.50332090  |
| H | 4.81168440  | -9.64054727  | -9.49523521  | C  | 5.26522977  | -6.29683512  | 0.69948506   |
| C | 6.01710091  | -8.07599974  | -8.54985716  | H  | 5.28281268  | -6.82033390  | 1.64460493   |
| O | 6.58145646  | -6.98028139  | -8.58218775  | C  | 5.96069621  | -10.22934093 | 2.56442392   |
| N | 6.05767928  | -8.89002071  | -7.46453034  | H  | 6.81563064  | -9.85907461  | 1.99094954   |
| H | 6.47774100  | -8.53145461  | -6.62003657  | H  | 5.34636188  | -9.35666077  | 2.82487027   |
| H | 5.36526427  | -9.63030972  | -7.37268227  | C  | 5.11857434  | -11.14983362 | 1.71337944   |
| C | 3.38109677  | -4.84974220  | -6.36858585  | N  | 4.65373176  | -10.75187240 | 0.45654152   |
| H | 3.30110492  | -3.84642648  | -6.79261401  | C  | 3.87320667  | -11.72582904 | -0.00601748  |
| H | 2.85296004  | -4.83791404  | -5.41023997  | H  | 3.33413522  | -11.69804142 | -0.94051446  |
| C | 4.82661967  | -5.14958952  | -6.16524983  | N  | 3.81687361  | -12.73621774 | 0.87691598   |
| C | 5.24250474  | -6.27271227  | -5.25572885  | H  | 3.31808752  | -13.62874081 | 0.74264186   |
| O | 4.39959615  | -6.89245434  | -4.58792302  | C  | 4.58896110  | -12.39195417 | 1.96729088   |
| C | 6.64900240  | -6.63223541  | -5.17930057  | H  | 4.64820480  | -13.02658848 | 2.83917531   |
| H | 6.92666946  | -7.46032448  | -4.53526640  | Cu | 4.96842896  | -9.00983740  | -0.57423036  |
| H | 9.19780827  | -5.79336976  | -6.83157137  | O  | 7.42897167  | -10.22233367 | -3.79771314  |
| C | 7.52955416  | -6.00881218  | -5.99190794  | H  | 7.91772761  | -11.00483880 | -3.43463912  |
| O | 8.80437874  | -6.38486017  | -6.15153577  | H  | 8.11998000  | -9.53000269  | -3.87139912  |
| C | 7.17492802  | -4.72469898  | -6.68161572  | O  | 3.01445579  | -8.62731972  | -0.63061429  |
| O | 8.09098509  | -4.03430755  | -7.11962775  | H  | 2.57379812  | -8.31879915  | -1.46116045  |
| C | 5.77159080  | -4.36878324  | -6.73034363  | H  | 2.36032612  | -9.09810569  | -0.02387451  |
| H | 5.52496260  | -3.48425880  | -7.30178463  | O  | 5.02334630  | -9.30981954  | -2.79902014  |
| C | -0.75564724 | -1.42141345  | -3.45642600  | H  | 4.73808380  | -8.58109832  | -3.38266461  |
| H | -1.01086793 | -1.17285700  | -2.41762413  | H  | 5.91181894  | -9.60373921  | -3.11601186  |
| H | -0.74505373 | -0.47706568  | -4.01025545  | O  | 2.06558555  | -7.35087333  | -2.92565974  |
| C | 0.61535973  | -2.05160227  | -3.51171062  | H  | 1.34832893  | -7.56814922  | -3.55874016  |
| C | 1.04475619  | -2.98720865  | -2.56283837  | H  | 2.76430050  | -6.97822618  | -3.49120584  |
| H | 0.35546333  | -3.31307028  | -1.78838752  | C  | 14.38979167 | -7.43664537  | -0.51210421  |
| C | 2.34850088  | -3.48154284  | -2.56460659  | C  | 7.00497616  | 2.23116252   | -5.62702481  |
| H | 2.67041508  | -4.20371036  | -1.82048203  | C  | 4.17083108  | -7.73410526  | -10.28944009 |
| C | 3.25504823  | -3.01443775  | -3.51855720  | C  | 2.64747282  | -5.83330415  | -7.31200352  |
| O | 4.56091150  | -3.46227388  | -3.46959550  | C  | -1.88073856 | -2.30144687  | -4.02805857  |
| H | 5.11915256  | -2.79431483  | -3.91995990  | C  | 10.93945479 | -8.74639160  | 1.53735551   |
|   |             |              |              | C  | 6.50350393  | -3.40266733  | 2.05583768   |
|   |             |              |              | C  | 6.47775895  | -10.83883504 | 3.86644029   |

## 4, Full

|   |             |              |              |    |             |              |              |
|---|-------------|--------------|--------------|----|-------------|--------------|--------------|
| C | 14.53603413 | -7.88951385  | -1.97122361  | C  | 2.84917266  | -2.04338260  | -4.59229363  |
| H | 14.96781231 | -8.89193422  | -1.98593484  | H  | 3.55452534  | -1.62433973  | -5.30040638  |
| H | 15.24658604 | -7.22444210  | -2.46325029  | C  | 1.54560787  | -1.56170871  | -4.52328826  |
| C | 13.19742482 | -7.94642824  | -2.66543886  | H  | 1.23737640  | -0.77277134  | -5.20404022  |
| C | 12.55849763 | -6.82132046  | -3.20205038  | C  | 10.51002695 | -8.44209308  | 0.07993147   |
| H | 13.05254173 | -5.85313387  | -3.18413676  | H  | 11.26984843 | -8.85093464  | -0.58649794  |
| C | 11.26826292 | -6.92080428  | -3.71737419  | H  | 10.51133853 | -7.36077513  | -0.08117093  |
| H | 10.75611710 | -6.04302577  | -4.09518288  | C  | 9.16173617  | -8.98540489  | -0.24995893  |
| C | 10.60354697 | -8.15337241  | -3.71373401  | N  | 8.90795413  | -10.31068521 | -0.57567362  |
| O | 9.32058920  | -8.26784101  | -4.17648907  | H  | 9.60608177  | -11.04346508 | -0.69614797  |
| H | 9.16377146  | -7.58085745  | -4.88069884  | C  | 7.57548755  | -10.46729488 | -0.72278874  |
| C | 11.23716501 | -9.29248316  | -3.21906570  | H  | 7.09167283  | -11.39429828 | -0.97970369  |
| H | 10.71122790 | -10.24207293 | -3.23072588  | N  | 6.95900073  | -9.31265877  | -0.51874719  |
| C | 12.51895482 | -9.17012420  | -2.69194023  | C  | 7.93481240  | -8.37968946  | -0.23148671  |
| H | 13.00243199 | -10.02212946 | -2.22702260  | H  | 7.69354703  | -7.35253961  | -0.01419520  |
| C | 5.94579439  | 1.24135641   | -5.07823975  | C  | 5.14346812  | -3.80431449  | 1.43451042   |
| H | 5.01347160  | 1.35171364   | -5.63899709  | H  | 4.70492304  | -2.92467136  | 0.94875420   |
| H | 5.73316905  | 1.47331039   | -4.03158821  | H  | 4.46702132  | -4.08719299  | 2.24555717   |
| C | 6.35732993  | -0.23027508  | -5.14792526  | C  | 5.22795261  | -4.94379977  | 0.47173913   |
| O | 5.77325818  | -1.08437845  | -4.50033123  | N  | 5.17814542  | -4.81381687  | -0.90682879  |
| O | 7.34659088  | -0.55609688  | -5.99590187  | H  | 5.12174627  | -3.95912484  | -1.45257635  |
| H | 7.48106667  | -1.51938298  | -5.92782914  | C  | 5.17562490  | -6.04969274  | -1.45962073  |
| C | 5.27319463  | -8.66947820  | -9.73075712  | H  | 5.10449268  | -6.23397030  | -2.51801754  |
| H | 6.01682999  | -8.83028244  | -10.51228565 | N  | 5.22161213  | -6.96869409  | -0.50970319  |
| H | 4.82850329  | -9.63657629  | -9.49106691  | C  | 5.24852192  | -6.29741209  | 0.69512100   |
| C | 5.99111781  | -8.05603151  | -8.51661898  | H  | 5.26980671  | -6.82535640  | 1.63776381   |
| O | 6.55050221  | -6.95261188  | -8.55937489  | C  | 5.96590126  | -10.22759267 | 2.56343916   |
| N | 5.99681404  | -8.83399551  | -7.41350850  | H  | 6.82279992  | -9.85746891  | 1.99251186   |
| H | 6.38057832  | -8.45046834  | -6.56002266  | H  | 5.34979748  | -9.35545154  | 2.82266941   |
| H | 5.32345667  | -9.59373797  | -7.33515373  | C  | 5.12711680  | -11.14892624 | 1.71165930   |
| C | 3.42917103  | -4.86973544  | -6.37190866  | N  | 4.65764523  | -10.75228831 | 0.45593678   |
| H | 3.38811864  | -3.86844591  | -6.80564536  | C  | 3.87834764  | -11.72813899 | -0.00358054  |
| H | 2.90133848  | -4.84597939  | -5.41271902  | H  | 3.33421407  | -11.70190929 | -0.93517029  |
| C | 4.85475444  | -5.23277569  | -6.15001590  | N  | 3.82698905  | -12.73895796 | 0.87929857   |
| C | 5.22736133  | -6.35835995  | -5.18877805  | H  | 3.32938058  | -13.63223361 | 0.74634329   |
| O | 4.31326222  | -6.90501097  | -4.53158803  | C  | 4.60174303  | -12.39236630 | 1.96691939   |
| C | 6.59318643  | -6.72758215  | -5.04901614  | H  | 4.66680112  | -13.02636719 | 2.83876913   |
| H | 6.84786601  | -7.47660502  | -4.30906230  | Cu | 4.96842579  | -9.01965533  | -0.60143957  |
| H | 8.87605885  | -5.11578123  | -7.33185284  | O  | 7.41973064  | -10.21784142 | -3.80760411  |
| C | 7.56999842  | -6.16816136  | -5.86219052  | H  | 7.90356801  | -11.00021420 | -3.44177544  |
| O | 8.80989028  | -6.41115966  | -5.94395973  | H  | 8.11968085  | -9.52976064  | -3.88447013  |
| C | 7.13950943  | -5.05821670  | -6.78363182  | O  | 3.00880197  | -8.69643221  | -0.68526894  |
| O | 8.07600009  | -4.53485968  | -7.49215896  | H  | 2.55161232  | -8.33173535  | -1.48386869  |
| C | 5.83497410  | -4.53566409  | -6.79447939  | H  | 2.35649816  | -9.13176271  | -0.05205435  |
| H | 5.62650825  | -3.68056911  | -7.41854098  | O  | 5.03655000  | -9.26678206  | -2.81844768  |
| C | -0.73865235 | -1.43364596  | -3.46296181  | H  | 4.74854178  | -8.53207007  | -3.39529239  |
| H | -0.96134822 | -1.22065860  | -2.40906257  | H  | 5.92007392  | -9.56847715  | -3.14359620  |
| H | -0.74772554 | -0.47229135  | -3.98634230  | O  | 2.01764858  | -7.30527823  | -2.89436019  |
| C | 0.63338313  | -2.05710853  | -3.58408681  | H  | 1.31019442  | -7.53806173  | -3.53299679  |
| C | 1.05887936  | -3.09405444  | -2.74420894  | H  | 2.74464036  | -7.00129428  | -3.46543583  |
| H | 0.36929108  | -3.49892006  | -2.01068398  | C  | 14.39079694 | -7.43716599  | -0.51167017  |
| C | 2.35618000  | -3.59918180  | -2.80229506  | C  | 6.99949357  | 2.24081862   | -5.62487471  |
| H | 2.66822126  | -4.40955478  | -2.15138849  | C  | 4.17702507  | -7.73429798  | -10.29144033 |
| C | 3.26838284  | -3.03570972  | -3.69901814  | C  | 2.66042914  | -5.83329889  | -7.31429786  |
| O | 4.56702873  | -3.50198772  | -3.69784491  | C  | -1.87836925 | -2.30022510  | -4.02855930  |
| H | 5.13648024  | -2.78849135  | -4.05846178  | C  | 10.93923541 | -8.74603885  | 1.53632891   |
|   |             |              |              | C  | 6.50253255  | -3.40327007  | 2.05693662   |
|   |             |              |              | C  | 6.47862789  | -10.83813835 | 3.86633090   |

0-, -H+

|   |             |              |              |    |             |              |              |
|---|-------------|--------------|--------------|----|-------------|--------------|--------------|
| C | 14.54590454 | -7.89719141  | -1.96074398  | H  | 3.48886917  | -1.89965979  | -5.18466429  |
| H | 14.96309270 | -8.90622763  | -1.96669180  | C  | 1.46674506  | -1.71065326  | -4.46123621  |
| H | 15.27606301 | -7.24465010  | -2.44323998  | H  | 1.14075901  | -1.12244884  | -5.31658153  |
| C | 13.22223127 | -7.92852851  | -2.68168738  | C  | 10.51954390 | -8.44397706  | 0.08163044   |
| C | 12.60530786 | -6.78692661  | -3.21101515  | H  | 11.27880206 | -8.85219270  | -0.58786084  |
| H | 13.11226212 | -5.82608956  | -3.16912565  | H  | 10.52037250 | -7.36172494  | -0.07789435  |
| C | 11.32163641 | -6.85214599  | -3.74725483  | C  | 9.17012579  | -8.98690022  | -0.25037416  |
| H | 10.83896009 | -5.95968945  | -4.12850192  | N  | 8.92078490  | -10.30973374 | -0.58701482  |
| C | 10.63439997 | -8.07687727  | -3.77778321  | H  | 9.61960037  | -11.04138883 | -0.71318364  |
| O | 9.36523587  | -8.17680562  | -4.24819488  | C  | 7.58879962  | -10.46880336 | -0.73980163  |
| H | 9.10601056  | -7.32385671  | -4.74062169  | H  | 7.10712136  | -11.39515223 | -1.00495235  |
| C | 11.25747753 | -9.23488425  | -3.30555333  | N  | 6.97022089  | -9.31887031  | -0.52817530  |
| H | 10.71989612 | -10.17855022 | -3.35481709  | C  | 7.94056480  | -8.38556733  | -0.22899375  |
| C | 12.53188124 | -9.14299739  | -2.75487908  | H  | 7.68944669  | -7.36110341  | -0.00904684  |
| H | 13.00243187 | -10.01300342 | -2.30982281  | C  | 5.13997395  | -3.80520235  | 1.42493939   |
| C | 5.93010339  | 1.23083211   | -5.08907047  | H  | 4.71511289  | -2.93285695  | 0.91356001   |
| H | 4.98739815  | 1.34560297   | -5.63218085  | H  | 4.45263685  | -4.06606586  | 2.23392657   |
| H | 5.73331643  | 1.46932288   | -4.04114557  | C  | 5.22782556  | -4.96354189  | 0.48328270   |
| C | 6.31576688  | -0.26250990  | -5.15614591  | N  | 5.20834658  | -4.85013590  | -0.89570459  |
| O | 5.67247163  | -1.07366211  | -4.50265536  | H  | 5.12924950  | -4.00819978  | -1.47313733  |
| O | 7.29649860  | -0.61312314  | -5.98053120  | C  | 5.20138963  | -6.09059923  | -1.43181640  |
| H | 7.41659690  | -1.60044829  | -5.96979579  | H  | 5.15219721  | -6.29142378  | -2.48978385  |
| C | 5.27466743  | -8.68817747  | -9.77780099  | N  | 5.22130754  | -6.99908084  | -0.47056301  |
| H | 5.96221941  | -8.89543178  | -10.59633626 | C  | 5.23226904  | -6.31523844  | 0.72582086   |
| H | 4.79943584  | -9.62696673  | -9.49101957  | H  | 5.23107724  | -6.83401410  | 1.67458568   |
| C | 6.08450827  | -8.06868419  | -8.63169740  | C  | 5.98426826  | -10.22909299 | 2.56578015   |
| O | 6.82539317  | -7.09377752  | -8.80681931  | H  | 6.84799727  | -9.86964819  | 1.99605680   |
| N | 5.94042518  | -8.65636720  | -7.42808188  | H  | 5.38080572  | -9.34419836  | 2.81559412   |
| H | 6.36764605  | -8.20491521  | -6.62559330  | C  | 5.13638673  | -11.14760346 | 1.72321590   |
| H | 5.21526432  | -9.35673709  | -7.27774543  | N  | 4.67984767  | -10.76788463 | 0.45928453   |
| C | 3.33386227  | -4.84942873  | -6.33635890  | C  | 3.89900900  | -11.74670691 | 0.01136247   |
| H | 3.27491394  | -3.85470942  | -6.78464666  | H  | 3.35110213  | -11.72717233 | -0.91879047  |
| H | 2.75784556  | -4.81859891  | -5.40227944  | N  | 3.83120622  | -12.74037144 | 0.91311758   |
| C | 4.76662651  | -5.12759727  | -6.01367377  | H  | 3.32972371  | -13.63243949 | 0.78831691   |
| C | 5.14578157  | -6.28432638  | -5.11216772  | C  | 4.59950697  | -12.38145701 | 1.99985375   |
| O | 4.23520222  | -6.97671048  | -4.57177340  | H  | 4.66034757  | -13.00220289 | 2.88207654   |
| C | 6.51637107  | -6.55212209  | -4.91198803  | Cu | 4.98680407  | -9.03301911  | -0.63608386  |
| H | 6.78436347  | -7.42014962  | -4.31685370  | O  | 7.47018988  | -10.12760321 | -3.82589172  |
| C | 7.53443695  | -5.73580866  | -5.43678056  | H  | 7.95741136  | -10.89169344 | -3.43531587  |
| O | 8.76095608  | -5.99352019  | -5.42672388  | H  | 8.15916180  | -9.43073988  | -3.93552123  |
| C | 7.09995041  | -4.37567924  | -5.99905975  | O  | 3.02747376  | -8.78107339  | -0.74573413  |
| O | 7.88346479  | -3.42993164  | -6.04148063  | H  | 2.57085408  | -8.36369156  | -1.52471776  |
| C | 5.70944748  | -4.24895557  | -6.41130942  | H  | 2.37970595  | -9.15851562  | -0.08045326  |
| H | 5.46328885  | -3.36703497  | -6.99180379  | O  | 5.06338587  | -9.20255494  | -2.83935874  |
| C | -0.81558886 | -1.36599248  | -3.45978790  | H  | 4.75191924  | -8.47959580  | -3.42899480  |
| H | -1.11351567 | -1.07599480  | -2.44270144  | H  | 5.95138063  | -9.48398660  | -3.16807705  |
| H | -0.79063766 | -0.44554800  | -4.05202407  | O  | 2.03791213  | -7.35188178  | -2.88433293  |
| C | 0.56048280  | -1.97737838  | -3.42884004  | H  | 2.77553614  | -7.05248840  | -3.45154301  |
| C | 1.00354377  | -2.74323420  | -2.34491690  | H  | 1.34863921  | -7.60096136  | -3.53425531  |
| H | 0.31756282  | -2.95277007  | -1.52641244  | C  | 14.38464166 | -7.43948936  | -0.50429676  |
| C | 2.31738488  | -3.20080795  | -2.26965429  | C  | 6.97689843  | 2.22951988   | -5.65407088  |
| H | 2.66156144  | -3.77303866  | -1.41348874  | C  | 4.19656690  | -7.71048370  | -10.29547294 |
| C | 3.21756206  | -2.87558459  | -3.28643922  | C  | 2.64652384  | -5.85308460  | -7.29060564  |
| O | 4.52930942  | -3.26784109  | -3.15928993  | C  | -1.90832152 | -2.27937098  | -4.03596531  |
| H | 5.09013610  | -2.64251889  | -3.66493213  | C  | 10.94782148 | -8.75177533  | 1.53823020   |
| C | 2.78281703  | -2.15516770  | -4.40302073  | C  | 6.49473238  | -3.40011475  | 2.05288109   |
|   |             |              |              | C  | 6.48422815  | -10.84176033 | 3.87216301   |



1-, -H+

|   |             |              |              |    |             |              |              |
|---|-------------|--------------|--------------|----|-------------|--------------|--------------|
| C | 14.53745031 | -7.89770320  | -1.95967269  | H  | 3.54906097  | -1.84606098  | -5.18132855  |
| H | 14.96687384 | -8.90244862  | -1.96621133  | C  | 1.50348726  | -1.69524364  | -4.49084484  |
| H | 15.25748429 | -7.23898258  | -2.44698502  | H  | 1.18289463  | -1.09931706  | -5.34147847  |
| C | 13.20881926 | -7.94957552  | -2.67256958  | C  | 10.51783209 | -8.44245064  | 0.08267613   |
| C | 12.57752862 | -6.82091627  | -3.21407514  | H  | 11.27869389 | -8.84805035  | -0.58624699  |
| H | 13.07557045 | -5.85473486  | -3.18789548  | H  | 10.51905526 | -7.36052629  | -0.07544788  |
| C | 11.29130958 | -6.90596532  | -3.74171275  | C  | 9.17008086  | -8.98476328  | -0.25133511  |
| H | 10.79584209 | -6.02390651  | -4.13122539  | N  | 8.92127860  | -10.30885772 | -0.58541601  |
| C | 10.61494681 | -8.13742840  | -3.74592679  | H  | 9.62109740  | -11.03761137 | -0.71598983  |
| O | 9.34498236  | -8.26018378  | -4.20440335  | C  | 7.59059091  | -10.46682368 | -0.74468449  |
| H | 9.08767230  | -7.43312811  | -4.74293879  | H  | 7.11096004  | -11.39149725 | -1.01706131  |
| C | 11.24852545 | -9.28023455  | -3.25309004  | N  | 6.97067605  | -9.31552244  | -0.53639401  |
| H | 10.71498302 | -10.22610117 | -3.27706482  | C  | 7.94167318  | -8.38171389  | -0.23697752  |
| C | 12.52593730 | -9.17021666  | -2.71387741  | H  | 7.69549080  | -7.35514655  | -0.02149781  |
| H | 12.99979088 | -10.02756374 | -2.24876397  | C  | 5.13874779  | -3.81427173  | 1.42731872   |
| C | 6.05877462  | 1.09026167   | -5.19859622  | H  | 4.70510486  | -2.94052440  | 0.92644860   |
| H | 5.09750283  | 1.17470152   | -5.71401934  | H  | 4.45607284  | -4.08741575  | 2.23680594   |
| H | 5.87188809  | 1.18017237   | -4.12325350  | C  | 5.22868214  | -4.96618486  | 0.47741568   |
| C | 6.69850926  | -0.27110391  | -5.52810153  | N  | 5.20417079  | -4.84266086  | -0.90077625  |
| O | 6.14479245  | -1.32507166  | -4.85646600  | H  | 5.13984856  | -3.99182853  | -1.46393805  |
| O | 7.59098606  | -0.47614823  | -6.31647890  | C  | 5.19100140  | -6.07999711  | -1.44511906  |
| H | 6.70612080  | -2.09063299  | -5.16003925  | H  | 5.13596006  | -6.27623679  | -2.50279449  |
| C | 5.30180148  | -8.67421634  | -9.77538065  | N  | 5.21106478  | -6.99530762  | -0.48965225  |
| H | 5.99653359  | -8.86482515  | -10.59248933 | C  | 5.23058232  | -6.31860355  | 0.71184094   |
| H | 4.83638917  | -9.62143705  | -9.49897170  | H  | 5.23699634  | -6.84334974  | 1.65669038   |
| C | 6.09626594  | -8.06008589  | -8.61710854  | C  | 5.98575644  | -10.22805402 | 2.56260358   |
| O | 6.81580165  | -7.06453012  | -8.76372058  | H  | 6.84787837  | -9.86398556  | 1.99630609   |
| N | 5.96205012  | -8.68459742  | -7.43094235  | H  | 5.37468210  | -9.34954589  | 2.81425776   |
| H | 6.37025457  | -8.23905912  | -6.61580466  | C  | 5.14695607  | -11.14985777 | 1.71164304   |
| H | 5.23643668  | -9.38768232  | -7.29716237  | N  | 4.67911714  | -10.75735819 | 0.45637245   |
| C | 3.32566183  | -4.92686179  | -6.28445615  | C  | 3.89913339  | -11.73323783 | 0.00140871   |
| H | 3.27922331  | -3.91333824  | -6.69028395  | H  | 3.35645489  | -11.70636911 | -0.93093276  |
| H | 2.74389124  | -4.92987185  | -5.35465688  | N  | 3.84456573  | -12.74046231 | 0.88936329   |
| C | 4.75533931  | -5.23957132  | -5.97213549  | H  | 3.35148253  | -13.63574947 | 0.75835155   |
| C | 5.12939025  | -6.41511856  | -5.09420388  | C  | 4.61992508  | -12.39133004 | 1.97524532   |
| O | 4.21474599  | -7.10676207  | -4.56076852  | H  | 4.68678243  | -13.02235431 | 2.84951026   |
| C | 6.50085328  | -6.70705023  | -4.90503334  | Cu | 4.98405409  | -9.03648143  | -0.65064442  |
| H | 6.75963303  | -7.59309977  | -4.33386180  | O  | 7.45063392  | -10.18583824 | -3.81213061  |
| C | 7.52344969  | -5.88494070  | -5.41472918  | H  | 7.93646705  | -10.96304207 | -3.43995695  |
| O | 8.75125359  | -6.13622732  | -5.44617736  | H  | 8.14854326  | -9.49449476  | -3.90991772  |
| C | 7.06918226  | -4.49874907  | -5.84617312  | O  | 3.01903684  | -8.81551445  | -0.77928300  |
| O | 7.77596594  | -3.51667462  | -5.63550339  | H  | 2.55642700  | -8.36103105  | -1.53319040  |
| C | 5.70639601  | -4.36674838  | -6.35073030  | H  | 2.37625218  | -9.17244710  | -0.09833371  |
| H | 5.47491444  | -3.47172742  | -6.91887124  | O  | 5.05194220  | -9.28983177  | -2.84148824  |
| C | -0.78772427 | -1.37055134  | -3.49022642  | H  | 4.73721655  | -8.57504838  | -3.44050224  |
| H | -1.06441239 | -1.07158828  | -2.47047389  | H  | 5.94185925  | -9.57110489  | -3.16753640  |
| H | -0.76523184 | -0.45543978  | -4.09006755  | O  | 2.02000630  | -7.31537606  | -2.87327856  |
| C | 0.58666440  | -1.99378360  | -3.47639377  | H  | 2.76939290  | -7.07245869  | -3.45450264  |
| C | 1.01915866  | -2.78821377  | -2.40802101  | H  | 1.32242886  | -7.56611402  | -3.51410817  |
| H | 0.31952862  | -3.04251826  | -1.61437985  | C  | 14.38122524 | -7.43649096  | -0.50360075  |
| C | 2.34043419  | -3.21829783  | -2.31334323  | C  | 7.00166405  | 2.23388784   | -5.66017432  |
| H | 2.67880848  | -3.80524227  | -1.46572878  | C  | 4.21235578  | -7.70793276  | -10.28991032 |
| C | 3.25335771  | -2.83641199  | -3.29758429  | C  | 2.63461809  | -5.87992739  | -7.28648390  |
| O | 4.57995770  | -3.16863110  | -3.13414117  | C  | -1.89822362 | -2.27896791  | -4.04129870  |
| H | 5.12311540  | -2.48463358  | -3.57368391  | C  | 10.94590953 | -8.75126156  | 1.53922501   |
| C | 2.82749320  | -2.11835577  | -4.41692998  | C  | 6.49259773  | -3.40475982  | 2.05603808   |
|   |             |              |              | C  | 6.48513393  | -10.84181402 | 3.86939791   |

2-, -H+

|   |             |              |              |    |             |              |              |
|---|-------------|--------------|--------------|----|-------------|--------------|--------------|
| C | 14.53956436 | -7.90680749  | -1.95822673  | H  | 3.59932484  | -2.13436487  | -4.96553815  |
| H | 14.96224524 | -8.91464543  | -1.96368839  | C  | 1.55171889  | -1.85142505  | -4.33798830  |
| H | 15.26347964 | -7.25306067  | -2.44630209  | H  | 1.31764224  | -1.18928542  | -5.16961886  |
| C | 13.20954483 | -7.94876864  | -2.67027049  | C  | 10.54106992 | -8.42909450  | 0.08657832   |
| C | 12.59414174 | -6.81567311  | -3.21832091  | H  | 11.31154708 | -8.82701964  | -0.57410867  |
| H | 13.10257478 | -5.85515792  | -3.19830021  | H  | 10.53756694 | -7.34616413  | -0.06189637  |
| C | 11.30837622 | -6.88900994  | -3.74862382  | C  | 9.20173335  | -8.97460766  | -0.25725802  |
| H | 10.82631010 | -5.99981745  | -4.13834266  | N  | 8.96144859  | -10.30163218 | -0.58668956  |
| C | 10.61760205 | -8.10864331  | -3.74193854  | H  | 9.66502930  | -11.02623713 | -0.71767730  |
| O | 9.34018743  | -8.21714358  | -4.20771889  | C  | 7.62822232  | -10.47574853 | -0.70349728  |
| H | 9.09988282  | -7.40481434  | -4.73604286  | H  | 7.15060526  | -11.40519025 | -0.96256751  |
| C | 11.22922689 | -9.25692435  | -3.23650424  | N  | 7.00546001  | -9.33106768  | -0.47445940  |
| H | 10.68094909 | -10.19395906 | -3.23870128  | C  | 7.96856438  | -8.38413563  | -0.20515340  |
| C | 12.50813174 | -9.15936607  | -2.69820928  | H  | 7.70630120  | -7.36315890  | 0.02285048   |
| H | 12.96624557 | -10.01913731 | -2.22088474  | C  | 5.12753674  | -3.83001282  | 1.43654519   |
| C | 5.92575969  | 1.23685039   | -5.07365412  | H  | 4.72018903  | -2.97451423  | 0.88661669   |
| H | 4.93403126  | 1.50056982   | -5.44375236  | H  | 4.42957775  | -4.04827329  | 2.25227400   |
| H | 5.92184187  | 1.31366260   | -3.97980803  | C  | 5.19619780  | -5.01881246  | 0.52066009   |
| C | 6.16714259  | -0.22058958  | -5.47958485  | N  | 5.02486982  | -4.92009617  | -0.84506975  |
| O | 5.24877091  | -0.95435054  | -5.80472300  | H  | 4.67158596  | -4.02464334  | -2.20684109  |
| O | 7.43247805  | -0.63972485  | -5.42105138  | C  | 5.02589126  | -6.17761858  | -1.29515825  |
| H | 7.46996180  | -1.58839107  | -5.68606937  | H  | 4.90161127  | -6.44783985  | -2.33369231  |
| C | 5.28284490  | -8.68397876  | -9.78012355  | N  | 5.17762754  | -7.09038886  | -0.31789158  |
| H | 5.97266055  | -8.88494525  | -10.59849712 | C  | 5.28500957  | -6.35903146  | 0.84671187   |
| H | 4.81331282  | -9.62711913  | -9.49882796  | H  | 5.40595674  | -6.83917895  | 1.80959478   |
| C | 6.08655209  | -8.07019049  | -8.62656612  | C  | 5.96528977  | -10.24293624 | 2.57848434   |
| O | 6.81685791  | -7.08215732  | -8.77399771  | H  | 6.81734163  | -9.87365136  | 2.00071979   |
| N | 5.94711653  | -8.68798624  | -7.43740359  | H  | 5.35259628  | -9.36562374  | 2.82921983   |
| H | 6.38024459  | -8.26633919  | -6.62647648  | C  | 5.13264939  | -11.18334622 | 1.74614330   |
| H | 5.23526307  | -9.40497722  | -7.30393473  | N  | 4.70518390  | -10.82590630 | 0.46903138   |
| C | 3.32684670  | -4.83713628  | -6.34790583  | C  | 3.92651090  | -11.80392787 | 0.02097515   |
| H | 3.28382301  | -3.85095528  | -6.81480020  | H  | 3.41232860  | -11.80408737 | -0.92752480  |
| H | 2.72771900  | -4.76411975  | -5.43498851  | N  | 3.83286571  | -12.77859325 | 0.93997718   |
| C | 4.75849924  | -5.10727130  | -6.00266744  | H  | 3.33629864  | -13.67135199 | 0.81355354   |
| C | 5.16324530  | -6.26268102  | -5.15249133  | C  | 4.58374823  | -12.40915785 | 2.03563187   |
| O | 4.25192888  | -7.07510589  | -4.61721388  | H  | 4.62188935  | -13.01670247 | 2.92854899   |
| C | 6.48222546  | -6.57949898  | -4.95474524  | Cu | 5.02279195  | -9.04884090  | -0.47380749  |
| H | 6.74458743  | -7.44358332  | -4.35124381  | O  | 7.44883617  | -10.18128483 | -3.80674182  |
| C | 7.51818841  | -5.75135850  | -5.49376678  | H  | 7.94137260  | -10.95586794 | -3.43597991  |
| O | 8.72094768  | -6.04060680  | -5.50839422  | H  | 8.13233025  | -9.47658140  | -3.87553259  |
| C | 7.09386033  | -4.36825526  | -6.02278803  | O  | 3.00959249  | -8.83557544  | -0.70901275  |
| O | 7.91314408  | -3.46250619  | -6.08830067  | H  | 2.75493310  | -7.90610051  | -0.84927834  |
| C | 5.69286123  | -4.20953196  | -6.38380293  | H  | 2.39007826  | -9.20987836  | 0.00104708   |
| H | 5.43251257  | -3.29663263  | -6.90534890  | O  | 5.03649625  | -9.46972882  | -2.70880538  |
| C | -0.77518698 | -1.41607450  | -3.44664671  | H  | 4.69747916  | -8.73711095  | -3.25250257  |
| H | -1.08064037 | -1.08306794  | -2.44515715  | H  | 5.94567670  | -9.66377822  | -3.04339648  |
| H | -0.69521698 | -0.51656608  | -4.06431523  | O  | 1.99267795  | -6.38629498  | -3.55993081  |
| C | 0.57108947  | -2.10328475  | -3.36694612  | H  | 1.75259632  | -5.45156351  | -3.40408227  |
| C | 0.91844039  | -2.94104195  | -2.30077878  | H  | 1.24212590  | -6.82567731  | -4.02987447  |
| H | 0.19023027  | -3.12739768  | -1.51356259  | C  | 14.38408868 | -7.44366391  | -0.50244655  |
| C | 2.18888479  | -3.52103919  | -2.20284698  | C  | 6.98356541  | 2.23048290   | -5.63744792  |
| H | 2.45777807  | -4.14212164  | -1.35325981  | C  | 4.19617692  | -7.71432013  | -10.29753987 |
| C | 3.16643664  | -3.23671604  | -3.17837248  | C  | 2.64343804  | -5.85133042  | -7.29835232  |
| O | 4.41177688  | -3.75273059  | -3.15159927  | C  | -1.90326472 | -2.29235502  | -4.02214883  |
| H | 3.36222882  | -6.66425810  | -4.36075449  | C  | 10.94890575 | -8.74880029  | 1.54398413   |
| C | 2.82740695  | -2.39442308  | -4.25085752  | C  | 6.48362744  | -3.41484119  | 2.06348567   |
|   |             |              |              | C  | 6.48280396  | -10.84596619 | 3.87960863   |

3-, -H+

|   |             |              |              |    |             |              |              |
|---|-------------|--------------|--------------|----|-------------|--------------|--------------|
| C | 14.55924674 | -7.90942121  | -1.95558383  | H  | 3.58630951  | -2.11185154  | -4.99086997  |
| H | 14.97047817 | -8.92147965  | -1.95097830  | C  | 1.54623800  | -1.81636649  | -4.35713275  |
| H | 15.29494944 | -7.26505118  | -2.43801803  | H  | 1.31201076  | -1.14737255  | -5.18322497  |
| C | 13.23907629 | -7.93780066  | -2.67953028  | C  | 10.52743150 | -8.43784156  | 0.08466218   |
| C | 12.63348216 | -6.78775186  | -3.19848896  | H  | 11.29039517 | -8.84452682  | -0.58064811  |
| H | 13.14333528 | -5.82929570  | -3.14792940  | H  | 10.52902016 | -7.35538985  | -0.06897184  |
| C | 11.35048651 | -6.84585096  | -3.73205721  | C  | 9.17931685  | -8.97751190  | -0.25066458  |
| H | 10.86951834 | -5.93740913  | -4.07318848  | N  | 8.93006989  | -10.30545902 | -0.57529533  |
| C | 10.66027376 | -8.06262928  | -3.76330485  | H  | 9.62599162  | -11.04068496 | -0.68399367  |
| O | 9.38579410  | -8.15441671  | -4.25185455  | C  | 7.59448859  | -10.46627490 | -0.70471518  |
| H | 9.13399893  | -7.28638088  | -4.61981610  | H  | 7.10845167  | -11.39489993 | -0.95171653  |
| C | 11.25646111 | -9.22599862  | -3.28129189  | N  | 6.97854509  | -9.31525967  | -0.49411854  |
| H | 10.69829842 | -10.15683474 | -3.29970144  | C  | 7.94931803  | -8.37622497  | -0.21962662  |
| C | 12.53262653 | -9.14491212  | -2.73638624  | H  | 7.69019300  | -7.35284287  | 0.00231966   |
| H | 12.98112388 | -10.01490429 | -2.27113090  | C  | 5.14157125  | -3.81190010  | 1.40565733   |
| C | 5.92820064  | 1.24786166   | -5.09036659  | H  | 4.74212317  | -2.95224365  | 0.85578115   |
| H | 4.93812061  | 1.52147645   | -5.44783527  | H  | 4.43491382  | -4.03374549  | 2.21239170   |
| H | 5.93979058  | 1.32303578   | -3.99713274  | C  | 5.21413474  | -4.99670700  | 0.48062434   |
| C | 6.15922850  | -0.20733244  | -5.49974107  | N  | 5.06578687  | -4.89824347  | -0.88838533  |
| O | 5.23029076  | -0.94626581  | -5.78130762  | H  | 4.65660924  | -4.03005952  | -2.25494169  |
| O | 7.43266283  | -0.62752027  | -5.50324870  | C  | 5.05560289  | -6.15940276  | -1.33265321  |
| H | 7.44140781  | -1.57656162  | -5.76107479  | H  | 4.93071483  | -6.43432621  | -2.36878139  |
| C | 5.28267118  | -8.68057783  | -9.77344318  | N  | 5.18081161  | -7.07015084  | -0.35387526  |
| H | 5.97622363  | -8.88157808  | -10.58860797 | C  | 5.28108168  | -6.33859619  | 0.80898303   |
| H | 4.81061426  | -9.62159152  | -9.49019719  | H  | 5.37863314  | -6.81547000  | 1.77592299   |
| C | 6.08405981  | -8.06327889  | -8.61963206  | C  | 5.97556479  | -10.24110470 | 2.57296196   |
| O | 6.84311199  | -7.09851195  | -8.77516650  | H  | 6.83171028  | -9.87710131  | 1.99839888   |
| N | 5.91047058  | -8.64799004  | -7.41696924  | H  | 5.36448480  | -9.36264235  | 2.82086403   |
| H | 6.37485721  | -8.24354343  | -6.61499874  | C  | 5.13761291  | -11.17629851 | 1.74121119   |
| H | 5.19407433  | -9.35934611  | -7.27476034  | N  | 4.68812201  | -10.80759011 | 0.47562789   |
| C | 3.24255096  | -4.81159430  | -6.33511255  | C  | 3.89786502  | -11.78076605 | 0.03670976   |
| H | 3.18016250  | -3.82253554  | -6.79377408  | H  | 3.35598067  | -11.76393353 | -0.89643210  |
| H | 2.62772649  | -4.77834357  | -5.42496177  | N  | 3.82158113  | -12.76487687 | 0.94857157   |
| C | 4.64475491  | -5.05921041  | -5.95927558  | H  | 3.32264299  | -13.65699080 | 0.82630930   |
| C | 4.98934772  | -6.25336506  | -5.11164348  | C  | 4.59437526  | -12.40454987 | 2.03253145   |
| O | 4.10783013  | -6.99498300  | -4.66109448  | H  | 4.64619165  | -13.01718158 | 2.92104492   |
| C | 6.39678870  | -6.52469119  | -4.84418659  | Cu | 4.97571136  | -9.02607017  | -0.51843765  |
| H | 6.66082378  | -7.40317020  | -4.26383572  | O  | 7.47531520  | -10.14419163 | -3.82685637  |
| C | 7.29818006  | -5.62566425  | -5.27627378  | H  | 7.93857302  | -10.92192913 | -3.42843150  |
| O | 8.62423373  | -5.72894468  | -5.14677419  | H  | 8.16264761  | -9.44764968  | -3.86518628  |
| C | 6.92701288  | -4.31655876  | -5.90427737  | O  | 3.00547226  | -8.95852486  | -0.81513210  |
| O | 7.85251142  | -3.49854717  | -6.04060073  | H  | 2.56752462  | -8.34078632  | -1.45121370  |
| C | 5.56943348  | -4.13080605  | -6.29111707  | H  | 2.36855447  | -9.22000125  | -0.08373074  |
| H | 5.31468834  | -3.21075875  | -6.79776931  | O  | 5.03337486  | -9.35235675  | -2.79360408  |
| C | -0.77657182 | -1.39625612  | -3.46037983  | H  | 4.64432503  | -8.65021493  | -3.34618706  |
| H | -1.07996957 | -1.06547882  | -2.45725571  | H  | 5.92921218  | -9.55437525  | -3.14437364  |
| H | -0.70314710 | -0.49469922  | -4.07794686  | O  | 1.94262206  | -7.27288213  | -2.78440074  |
| C | 0.57130946  | -2.07760115  | -3.38682638  | H  | 2.62680229  | -6.76323371  | -3.24593998  |
| C | 0.91459596  | -2.93440125  | -2.33137717  | H  | 1.33447598  | -7.54488295  | -3.50226910  |
| H | 0.17849853  | -3.13939804  | -1.55577018  | C  | 14.38812652 | -7.43728600  | -0.50454367  |
| C | 2.17417100  | -3.52350920  | -2.24314380  | C  | 6.98044345  | 2.23463198   | -5.66173267  |
| H | 2.42382425  | -4.18645299  | -1.42200304  | C  | 4.19839785  | -7.71083467  | -10.29585920 |
| C | 3.14691240  | -3.23474996  | -3.21887926  | C  | 2.62849473  | -5.85146736  | -7.29936037  |
| O | 4.39503804  | -3.76148309  | -3.20118764  | C  | -1.90144936 | -2.27878598  | -4.03342126  |
| H | 8.90995551  | -4.81026580  | -5.38693343  | C  | 10.95021395 | -8.75065360  | 1.54204120   |
| C | 2.81702546  | -2.37253989  | -4.27670461  | C  | 6.49160300  | -3.40240112  | 2.05112077   |
|   |             |              |              | C  | 6.48579281  | -10.84502970 | 3.87697272   |

4-, -H+

|   |             |              |              |    |             |              |              |
|---|-------------|--------------|--------------|----|-------------|--------------|--------------|
| C | 14.54233553 | -7.90131422  | -1.96062274  | H  | 3.51026610  | -2.01393481  | -5.22140323  |
| H | 14.95287122 | -8.91430922  | -1.96582208  | C  | 1.49770015  | -1.77651480  | -4.48855620  |
| H | 15.27799559 | -7.25590099  | -2.44245791  | H  | 1.17804894  | -1.19704295  | -5.35229673  |
| C | 13.21786783 | -7.92279735  | -2.68329266  | C  | 10.52612467 | -8.43527483  | 0.08408718   |
| C | 12.61403455 | -6.77462251  | -3.21224364  | H  | 11.28198888 | -8.85211151  | -0.58323418  |
| H | 13.12774544 | -5.81791450  | -3.16507961  | H  | 10.54299966 | -7.35349373  | -0.07248311  |
| C | 11.33283482 | -6.82761598  | -3.75404968  | C  | 9.16945908  | -8.95449404  | -0.25158155  |
| H | 10.85624756 | -5.92703810  | -4.12215401  | N  | 8.90245018  | -10.27745725 | -0.57928287  |
| C | 10.63597389 | -8.04411028  | -3.78925266  | H  | 9.59118657  | -11.01766335 | -0.69726751  |
| O | 9.37034227  | -8.13729684  | -4.28067326  | C  | 7.56725332  | -10.41720540 | -0.72835212  |
| H | 9.11101445  | -7.27727983  | -4.72732797  | H  | 7.07190094  | -11.33786697 | -0.98766164  |
| C | 11.23678740 | -9.20679016  | -3.30085496  | N  | 6.96626179  | -9.25638600  | -0.52130294  |
| H | 10.68352204 | -10.14084137 | -3.32899256  | C  | 7.94876125  | -8.33368082  | -0.23335583  |
| C | 12.50976640 | -9.12800474  | -2.74504968  | H  | 7.70541289  | -7.30447667  | -0.02154578  |
| H | 12.95948560 | -10.00099960 | -2.28438333  | C  | 5.14311300  | -3.78276376  | 1.38124764   |
| C | 5.90938373  | 1.27013160   | -5.08794667  | H  | 4.73496456  | -2.89266832  | 0.88677225   |
| H | 4.97949897  | 1.38841936   | -5.65081325  | H  | 4.44196695  | -4.05684242  | 2.17626690   |
| H | 5.70207172  | 1.55934561   | -4.05501101  | C  | 5.22134427  | -4.91254657  | 0.38920426   |
| C | 6.26793287  | -0.22557994  | -5.10203223  | N  | 5.11448122  | -4.76606459  | -0.98595120  |
| O | 5.56984194  | -0.82138694  | -4.15113538  | H  | 4.80354978  | -3.73294245  | -2.35416735  |
| O | 6.99866471  | -0.81725728  | -5.89655942  | C  | 5.10236453  | -6.01918076  | -1.46367967  |
| H | 7.47304501  | -2.42148556  | -5.90813094  | H  | 5.01866963  | -6.26194072  | -2.51130395  |
| C | 5.28332486  | -8.68028436  | -9.77193143  | N  | 5.18136195  | -6.96169541  | -0.50749793  |
| H | 5.97679924  | -8.88237127  | -10.58690327 | C  | 5.25276857  | -6.26341267  | 0.67544765   |
| H | 4.81323865  | -9.62228660  | -9.48884199  | H  | 5.30888529  | -6.76884352  | 1.63090495   |
| C | 6.08152973  | -8.05765567  | -8.62002552  | C  | 5.99003992  | -10.22647850 | 2.56369348   |
| O | 6.81187066  | -7.06933729  | -8.77753131  | H  | 6.85576866  | -9.86004421  | 2.00410364   |
| N | 5.93282274  | -8.65449982  | -7.42242921  | H  | 5.38003727  | -9.34705186  | 2.81314075   |
| H | 6.37642534  | -8.22928975  | -6.61669067  | C  | 5.15344208  | -11.14170056 | 1.70323129   |
| H | 5.22316144  | -9.37236174  | -7.27888730  | N  | 4.68364572  | -10.73005303 | 0.45479669   |
| C | 3.32408081  | -4.81974088  | -6.36277228  | C  | 3.90742312  | -11.70126499 | -0.01405200  |
| H | 3.26064528  | -3.83541692  | -6.83103350  | H  | 3.35648253  | -11.65334153 | -0.94085548  |
| H | 2.74462194  | -4.77505518  | -5.42989580  | N  | 3.85700143  | -12.72559979 | 0.85733629   |
| C | 4.73634430  | -5.08256598  | -5.99939104  | H  | 3.36177587  | -13.61818661 | 0.72013570   |
| C | 5.10388459  | -6.29404330  | -5.14918041  | C  | 4.63263587  | -12.38968741 | 1.94829417   |
| O | 4.17461845  | -7.00476835  | -4.70083910  | H  | 4.70256426  | -13.03508331 | 2.81158075   |
| C | 6.47244637  | -6.54660437  | -4.92274922  | Cu | 4.97212770  | -8.94589835  | -0.59104689  |
| H | 6.74614082  | -7.43421194  | -4.36263654  | O  | 7.49410813  | -10.12520491 | -3.84205269  |
| C | 7.47530566  | -5.67451164  | -5.36273203  | H  | 7.96759396  | -10.89447141 | -3.44233304  |
| O | 8.71135261  | -5.86746998  | -5.35727668  | H  | 8.18244015  | -9.42780606  | -3.92616452  |
| C | 6.99512966  | -4.31425903  | -5.82864625  | O  | 2.99550695  | -8.88157824  | -0.82203249  |
| O | 7.84833706  | -3.35823380  | -5.76265463  | H  | 2.54309359  | -8.29357295  | -1.47817708  |
| C | 5.67012069  | -4.13261585  | -6.28477650  | H  | 2.36598839  | -9.17251890  | -0.09860366  |
| H | 5.41113893  | -3.21205966  | -6.79488768  | O  | 5.04752811  | -9.31342507  | -2.84910574  |
| C | -0.78217571 | -1.38098411  | -3.47169805  | H  | 4.71494774  | -8.59168241  | -3.41575083  |
| H | -1.06560895 | -1.08264074  | -2.45308377  | H  | 5.95902459  | -9.52375582  | -3.15785722  |
| H | -0.75081121 | -0.46253500  | -4.06827156  | O  | 1.98878445  | -7.25645449  | -2.84813796  |
| C | 0.59166700  | -2.01316255  | -3.44811264  | H  | 2.74866045  | -6.96836607  | -3.38400362  |
| C | 1.04137479  | -2.76621379  | -2.35589639  | H  | 1.33338676  | -7.53707098  | -3.51976317  |
| H | 0.35803221  | -2.96438478  | -1.53221876  | C  | 14.38421882 | -7.43929180  | -0.50436655  |
| C | 2.34704893  | -3.24871171  | -2.27770883  | C  | 6.98475304  | 2.22156741   | -5.67093815  |
| H | 2.68160301  | -3.82015858  | -1.41897713  | C  | 4.19820846  | -7.71290339  | -10.29688928 |
| C | 3.25304421  | -2.96290206  | -3.30944232  | C  | 2.64831526  | -5.85152959  | -7.29479021  |
| O | 4.56229075  | -3.35532960  | -3.27433154  | C  | -1.89804392 | -2.28103920  | -4.03481388  |
| H | 5.62783027  | -1.80297313  | -4.07190917  | C  | 10.94855446 | -8.75041226  | 1.54093725   |
| C | 2.80767173  | -2.24283867  | -4.42685834  | C  | 6.49172004  | -3.40022156  | 2.04803384   |
|   |             |              |              | C  | 6.48371343  | -10.84411543 | 3.87248227   |

5-, -H+

|   |             |              |              |    |             |              |              |
|---|-------------|--------------|--------------|----|-------------|--------------|--------------|
| C | 14.53434662 | -7.90623640  | -1.96069993  | H  | 3.56828983  | -2.07938907  | -5.05388183  |
| H | 14.95131233 | -8.91667146  | -1.96757511  | C  | 1.52289280  | -1.78786358  | -4.42607225  |
| H | 15.26180458 | -7.25629594  | -2.44916774  | H  | 1.25250011  | -1.16222234  | -5.27318780  |
| C | 13.20389826 | -7.93698917  | -2.67399666  | C  | 10.51569069 | -8.43924251  | 0.08549832   |
| C | 12.59988823 | -6.79855362  | -3.22428351  | H  | 11.28038604 | -8.83424500  | -0.58461909  |
| H | 13.11642670 | -5.84233664  | -3.20122371  | H  | 10.50669560 | -7.35679150  | -0.06850144  |
| C | 11.31651461 | -6.85907452  | -3.76159158  | C  | 9.17221024  | -8.99351811  | -0.25130093  |
| H | 10.84476647 | -5.96715646  | -4.15713325  | N  | 8.93491490  | -10.32123604 | -0.58023248  |
| C | 10.61355078 | -8.07305147  | -3.76396257  | H  | 9.64007397  | -11.04686497 | -0.69931941  |
| O | 9.33980466  | -8.16604162  | -4.23451106  | C  | 7.60560052  | -10.49238026 | -0.73794253  |
| H | 9.09537214  | -7.33851782  | -4.75724812  | H  | 7.13462680  | -11.42167935 | -1.00956373  |
| C | 11.21463771 | -9.22709216  | -3.25376395  | N  | 6.97533594  | -9.34601302  | -0.53522772  |
| H | 10.66078598 | -10.16116920 | -3.26026815  | C  | 7.93769340  | -8.40174553  | -0.24093159  |
| C | 12.49262252 | -9.14182409  | -2.70874689  | H  | 7.68128419  | -7.37628340  | -0.03183268  |
| H | 12.94231350 | -10.00751321 | -2.23294529  | C  | 5.13515603  | -3.82308666  | 1.44068599   |
| C | 5.92717011  | 1.23736434   | -5.08572397  | H  | 4.72726206  | -2.96358157  | 0.89635808   |
| H | 4.93288443  | 1.51422151   | -5.43928714  | H  | 4.43587358  | -4.04383361  | 2.25258886   |
| H | 5.92710813  | 1.30458513   | -3.99244818  | C  | 5.21024248  | -5.01320163  | 0.53366033   |
| C | 6.14001319  | -0.23254169  | -5.50215707  | N  | 5.03454410  | -4.92800794  | -0.83301009  |
| O | 5.16854968  | -0.94896165  | -5.70581012  | H  | 4.89124360  | -4.11290873  | -1.44040530  |
| O | 7.39080020  | -0.66229095  | -5.58119038  | C  | 4.99670669  | -6.17519651  | -1.34204590  |
| H | 7.42564236  | -1.63787509  | -5.81999865  | H  | 4.80007486  | -6.39296322  | -2.37963971  |
| C | 5.27381561  | -8.69319984  | -9.78220581  | N  | 5.15595580  | -7.06779035  | -0.37860670  |
| H | 5.95930799  | -8.90050667  | -10.60238484 | C  | 5.28379914  | -6.36075519  | 0.79907479   |
| H | 4.79531328  | -9.63058426  | -9.49650564  | H  | 5.41365151  | -6.85991225  | 1.74773023   |
| C | 6.09192617  | -8.08283640  | -8.63894707  | C  | 5.98033391  | -10.23939736 | 2.56926824   |
| O | 6.85087189  | -7.12406607  | -8.80543526  | H  | 6.83999412  | -9.87794224  | 1.99746997   |
| N | 5.93462030  | -8.67152357  | -7.43502393  | H  | 5.36900369  | -9.36045299  | 2.81760804   |
| H | 6.39535505  | -8.25121505  | -6.64192535  | C  | 5.13944096  | -11.17105261 | 1.73327255   |
| H | 5.19081982  | -9.34932893  | -7.27431338  | N  | 4.68416613  | -10.80462213 | 0.46762421   |
| C | 3.32292204  | -4.86767950  | -6.32044956  | C  | 3.89515096  | -11.78147414 | 0.03101939   |
| H | 3.31165525  | -3.87552193  | -6.77959151  | H  | 3.35366349  | -11.77039838 | -0.90263596  |
| H | 2.70002276  | -4.80875079  | -5.41703522  | N  | 3.82188860  | -12.76317669 | 0.94454947   |
| C | 4.73593478  | -5.19296351  | -5.93122044  | H  | 3.32566992  | -13.65697306 | 0.82212598   |
| C | 5.06633560  | -6.30647531  | -5.11166070  | C  | 4.59568301  | -12.39908847 | 2.02537227   |
| O | 4.24468467  | -7.13187564  | -4.60531031  | H  | 4.65101413  | -13.01031404 | 2.91462518   |
| C | 6.52198538  | -6.47380450  | -4.72298872  | Cu | 4.98559927  | -9.09315200  | -0.63925905  |
| H | 6.57204258  | -6.19284671  | -3.66031303  | O  | 7.48382840  | -10.14885821 | -3.82745011  |
| C | 7.55637109  | -5.61217137  | -5.41566757  | H  | 7.96574777  | -10.92654847 | -3.45344971  |
| O | 8.73356166  | -5.99576028  | -5.50027404  | H  | 8.16990362  | -9.44560593  | -3.89907409  |
| C | 7.09289843  | -4.29273955  | -5.89282311  | O  | 3.01716253  | -8.96659274  | -0.85852055  |
| O | 7.89127955  | -3.32559605  | -6.05245426  | H  | 2.57829042  | -8.42205521  | -1.56574092  |
| C | 5.70955575  | -4.23893299  | -6.22332247  | H  | 2.37586900  | -9.22739131  | -0.13596771  |
| H | 5.40875531  | -3.33169268  | -6.73683163  | O  | 5.09759254  | -9.23528556  | -2.84341399  |
| C | -0.78763096 | -1.36721537  | -3.48757184  | H  | 4.78372370  | -8.53575128  | -3.46342140  |
| H | -1.08550092 | -1.04215340  | -2.48122482  | H  | 5.99049201  | -9.51756108  | -3.15749689  |
| H | -0.73399216 | -0.47309089  | -4.11407104  | O  | 2.06192311  | -7.31279166  | -2.88984706  |
| C | 0.55872645  | -2.03050183  | -3.41994324  | H  | 2.79627718  | -7.11688223  | -3.51127700  |
| C | 0.89985416  | -2.85402521  | -2.31789555  | H  | 1.33715820  | -7.56250109  | -3.50076015  |
| H | 0.14727903  | -3.03636731  | -1.55445914  | C  | 14.38387106 | -7.44217849  | -0.50394339  |
| C | 2.15562712  | -3.39638901  | -2.19755171  | C  | 6.98045380  | 2.23113890   | -5.64815653  |
| H | 2.42164458  | -4.03429776  | -1.36111104  | C  | 4.19682617  | -7.71090759  | -10.29528927 |
| C | 3.17359469  | -3.10956273  | -3.18984640  | C  | 2.64237896  | -5.85586991  | -7.29400190  |
| O | 4.36324576  | -3.51744612  | -3.06624523  | C  | -1.90125346 | -2.27386030  | -4.04403071  |
| H | 6.80185134  | -7.53264134  | -4.74134493  | C  | 10.94647006 | -8.75005087  | 1.54055139   |
| C | 2.79323147  | -2.30549004  | -4.33240364  | C  | 6.48758897  | -3.41067960  | 2.06598617   |
|   |             |              |              | C  | 6.48457500  | -10.84471779 | 3.87620280   |

6-, -H+

|   |             |              |              |    |             |              |              |
|---|-------------|--------------|--------------|----|-------------|--------------|--------------|
| C | 14.54033163 | -7.91057536  | -1.95816669  | H  | 3.57832303  | -2.12133299  | -5.00021661  |
| H | 14.94141009 | -8.92773038  | -1.95737516  | C  | 1.53955438  | -1.82316982  | -4.36332915  |
| H | 15.28377850 | -7.27540318  | -2.44120804  | H  | 1.30072655  | -1.16125129  | -5.19279451  |
| C | 13.21675152 | -7.91861896  | -2.68389644  | C  | 10.52999071 | -8.43714913  | 0.08454564   |
| C | 12.62602944 | -6.75984459  | -3.20647169  | H  | 11.29335962 | -8.84335730  | -0.58121327  |
| H | 13.15210434 | -5.80972294  | -3.15729416  | H  | 10.53253297 | -7.35480516  | -0.07030441  |
| C | 11.34561839 | -6.79570477  | -3.74998299  | C  | 9.18239196  | -8.97641297  | -0.25404036  |
| H | 10.87613045 | -5.88545564  | -4.10281158  | N  | 8.93254617  | -10.30228338 | -0.58337043  |
| C | 10.63045179 | -8.00163833  | -3.78836234  | H  | 9.63002036  | -11.03431078 | -0.70270935  |
| O | 9.36363171  | -8.07178124  | -4.27926968  | C  | 7.59829834  | -10.46099889 | -0.72163580  |
| H | 9.10735648  | -7.18868401  | -4.67734826  | H  | 7.11369646  | -11.38748110 | -0.97975324  |
| C | 11.21493726 | -9.17334536  | -3.30160613  | N  | 6.98199958  | -9.31023067  | -0.50734600  |
| H | 10.64931676 | -10.09993044 | -3.32919710  | C  | 7.95377569  | -8.37376539  | -0.22560727  |
| C | 12.49032309 | -9.11384343  | -2.74812947  | H  | 7.70048295  | -7.34878897  | -0.00871005  |
| H | 12.92479338 | -9.99544513  | -2.28953466  | C  | 5.14144758  | -3.80087640  | 1.39970453   |
| C | 5.92197570  | 1.25470581   | -5.08145374  | H  | 4.74088878  | -2.93252152  | 0.86507857   |
| H | 4.92749327  | 1.52695253   | -5.43308933  | H  | 4.43611596  | -4.03345775  | 2.20524372   |
| H | 5.93278524  | 1.32641613   | -3.98714314  | C  | 5.20961993  | -4.97270473  | 0.46066424   |
| C | 6.14535304  | -0.20281751  | -5.49083517  | N  | 5.03486201  | -4.87520716  | -0.90356620  |
| O | 5.21949106  | -0.94262808  | -5.77171654  | H  | 4.66059158  | -4.01879561  | -2.21696873  |
| O | 7.41761653  | -0.63150288  | -5.49556925  | C  | 5.03627225  | -6.13817383  | -1.35252253  |
| H | 7.41539096  | -1.56887223  | -5.77609876  | H  | 4.91445348  | -6.41025145  | -2.38953532  |
| C | 5.28100735  | -8.68050334  | -9.77170376  | N  | 5.18483246  | -7.04849918  | -0.37646061  |
| H | 5.97291945  | -8.88471431  | -10.58736674 | C  | 5.29234335  | -6.32216287  | 0.78112189   |
| H | 4.80929323  | -9.62136614  | -9.48713701  | H  | 5.41213891  | -6.79949905  | 1.74406896   |
| C | 6.08016746  | -8.05557801  | -8.61875422  | C  | 5.97589196  | -10.23731356 | 2.57226071   |
| O | 6.82849077  | -7.08299743  | -8.78482456  | H  | 6.83252968  | -9.87018459  | 2.00025249   |
| N | 5.91219949  | -8.63593574  | -7.41547225  | H  | 5.36158669  | -9.36088107  | 2.82315924   |
| H | 6.34155597  | -8.19860655  | -6.60780957  | C  | 5.13886638  | -11.16828368 | 1.73260373   |
| H | 5.19444059  | -9.34569150  | -7.27339557  | N  | 4.68826822  | -10.79191624 | 0.46735152   |
| C | 3.27385116  | -4.84831540  | -6.30570445  | C  | 3.90115996  | -11.76516834 | 0.02195903   |
| H | 3.21713600  | -3.84998276  | -6.74407503  | H  | 3.36119134  | -11.74572869 | -0.91208473  |
| H | 2.66508410  | -4.83728835  | -5.38750284  | N  | 3.82865505  | -12.75694169 | 0.92595083   |
| C | 4.67619162  | -5.12505016  | -5.94721388  | H  | 3.32872510  | -13.64790960 | 0.80023544   |
| C | 5.06081147  | -6.30501861  | -5.08944108  | C  | 4.59732616  | -12.39974990 | 2.01361101   |
| O | 4.16007603  | -7.04682618  | -4.62422941  | H  | 4.65160272  | -13.01953313 | 2.89668979   |
| C | 6.44517402  | -6.54239502  | -4.85763974  | Cu | 4.98728214  | -9.02592758  | -0.56083919  |
| H | 6.72807337  | -7.38606623  | -4.23870959  | O  | 7.51179567  | -10.10496979 | -3.84106005  |
| C | 7.40985532  | -5.67538513  | -5.35222166  | H  | 7.99056263  | -10.86950640 | -3.44027421  |
| O | 8.68012269  | -5.75997086  | -5.27900539  | H  | 8.18565877  | -9.39379815  | -3.91815686  |
| C | 6.93846283  | -4.44298234  | -6.03562285  | O  | 3.01141179  | -8.93309687  | -0.82258782  |
| O | 7.87122311  | -3.56635723  | -6.33822242  | H  | 2.57024364  | -8.32943551  | -1.47161089  |
| C | 5.61282421  | -4.20901329  | -6.35457035  | H  | 2.37395823  | -9.20414292  | -0.09556768  |
| H | 5.34509352  | -3.30793318  | -6.88909910  | O  | 5.07080457  | -9.30903165  | -2.82512110  |
| C | -0.77915985 | -1.40096609  | -3.45502045  | H  | 4.72495376  | -8.59752361  | -3.39969669  |
| H | -1.08418888 | -1.07753708  | -2.45079145  | H  | 5.97380418  | -9.52991004  | -3.15197286  |
| H | -0.70576919 | -0.50015615  | -4.07122312  | O  | 1.99198517  | -7.24754856  | -2.82394098  |
| C | 0.56963076  | -2.07766244  | -3.38230606  | H  | 2.74149636  | -6.98635505  | -3.39046661  |
| C | 0.92039095  | -2.92395827  | -2.31529754  | H  | 1.31663933  | -7.52926008  | -3.47404952  |
| H | 0.18563610  | -3.12224581  | -1.53850283  | C  | 14.38422459 | -7.43897269  | -0.50443601  |
| C | 2.17841339  | -3.50471431  | -2.22083736  | C  | 6.97568446  | 2.23623870   | -5.65677603  |
| H | 2.43238116  | -4.16716637  | -1.40151579  | C  | 4.19706542  | -7.71014561  | -10.29624230 |
| C | 3.15313385  | -3.21133093  | -3.20081990  | C  | 2.63541138  | -5.85481525  | -7.29109835  |
| O | 4.40269838  | -3.69044035  | -3.16506979  | C  | -1.90204747 | -2.28163345  | -4.03369143  |
| H | 8.70322897  | -4.00665662  | -6.02577506  | C  | 10.94939098 | -8.75085929  | 1.54236610   |
| C | 2.80958943  | -2.37186460  | -4.28143331  | C  | 6.49222861  | -3.40167465  | 2.04951945   |
|   |             |              |              | C  | 6.48445742  | -10.84480530 | 3.87642831   |

7-, -H+

|   |             |              |              |    |             |              |              |
|---|-------------|--------------|--------------|----|-------------|--------------|--------------|
| C | 14.53648362 | -7.90105873  | -1.96308028  | H  | 3.53720118  | -1.67838103  | -5.22712404  |
| H | 14.94590020 | -8.91511363  | -1.96955725  | C  | 1.51349582  | -1.57341941  | -4.48991826  |
| H | 15.27210975 | -7.25769570  | -2.44797698  | H  | 1.21420141  | -0.82282175  | -5.21780218  |
| C | 13.21036583 | -7.91975951  | -2.68583978  | C  | 10.50797368 | -8.45214386  | 0.08275538   |
| C | 12.63178605 | -6.77802504  | -3.25668700  | H  | 11.29257739 | -8.81713892  | -0.58195730  |
| H | 13.15775407 | -5.82752188  | -3.22881546  | H  | 10.46151219 | -7.36974354  | -0.06718202  |
| C | 11.35649358 | -6.83159733  | -3.81752025  | C  | 9.18992275  | -9.05629932  | -0.27725213  |
| H | 10.89821068 | -5.93482100  | -4.22037102  | N  | 9.00048532  | -10.40031866 | -0.57074059  |
| C | 10.64254115 | -8.03450984  | -3.82059362  | H  | 9.72200344  | -11.11540112 | -0.63563960  |
| O | 9.37120689  | -8.12445457  | -4.31561103  | C  | 7.68368490  | -10.60081503 | -0.80525326  |
| H | 9.19103347  | -7.40153340  | -4.95956597  | H  | 7.25412401  | -11.55067395 | -1.07551111  |
| C | 11.21214039 | -9.18956416  | -3.28344457  | N  | 7.01815363  | -9.46866967  | -0.68911243  |
| H | 10.64048654 | -10.11202124 | -3.28470299  | C  | 7.94251360  | -8.49720304  | -0.36446454  |
| C | 12.47946355 | -9.11460467  | -2.71568347  | H  | 7.64590425  | -7.47502170  | -0.20534976  |
| H | 12.90611855 | -9.98367928  | -2.22501157  | C  | 5.13812238  | -3.77693448  | 1.43191901   |
| C | 5.94656545  | 1.21424344   | -5.10145375  | H  | 4.72582238  | -2.89974879  | 0.91792045   |
| H | 4.99795649  | 1.33154049   | -5.63160433  | H  | 4.44460698  | -4.02431654  | 2.24130762   |
| H | 5.76263396  | 1.42184009   | -4.04331099  | C  | 5.22830857  | -4.93948850  | 0.50670935   |
| C | 6.36204311  | -0.26466335  | -5.21377747  | N  | 5.04950450  | -4.86906357  | -0.86296179  |
| O | 5.75368508  | -1.12148071  | -4.58646798  | H  | 4.91962975  | -4.04193026  | -1.43812302  |
| O | 7.34926306  | -0.56668962  | -6.05434973  | C  | 5.10515489  | -6.13603240  | -1.35681320  |
| H | 7.49226254  | -1.54600330  | -6.06878959  | H  | 4.90570985  | -6.40395704  | -2.38080553  |
| C | 5.28070099  | -8.68989559  | -9.78286153  | N  | 5.31647415  | -7.00271859  | -0.38524232  |
| H | 5.96764826  | -8.89109235  | -10.60366701 | C  | 5.38880515  | -6.27649219  | 0.77443823   |
| H | 4.80334060  | -9.62989524  | -9.50774210  | H  | 5.55447493  | -6.75151727  | 1.73152469   |
| C | 6.10300489  | -8.10452415  | -8.62933629  | C  | 5.98413826  | -10.23527639 | 2.57192055   |
| O | 6.78481427  | -7.07333016  | -8.73943899  | H  | 6.84455684  | -9.89289621  | 1.98880298   |
| N | 6.07067389  | -8.82891873  | -7.49633269  | H  | 5.39352926  | -9.34420430  | 2.82023988   |
| H | 6.55788982  | -8.48226221  | -6.68207093  | C  | 5.12267341  | -11.15281537 | 1.74914571   |
| H | 5.33167550  | -9.51457559  | -7.34037780  | N  | 4.63657314  | -10.75042652 | 0.51132172   |
| C | 3.35411696  | -4.85644433  | -6.35493750  | C  | 3.85298927  | -11.72574942 | 0.06641135   |
| H | 3.23949478  | -3.84593443  | -6.75262676  | H  | 3.29613602  | -11.69949563 | -0.85779202  |
| H | 2.83930875  | -4.88682170  | -5.38409703  | N  | 3.81223327  | -12.74254260 | 0.94622501   |
| C | 4.80190269  | -5.11190049  | -6.11580406  | H  | 3.32403845  | -13.63857565 | 0.81065143   |
| C | 5.21637830  | -6.37928722  | -5.42891465  | C  | 4.60611056  | -12.39814167 | 2.02036206   |
| O | 4.51946676  | -7.36908087  | -5.40393074  | H  | 4.69094895  | -13.03513128 | 2.88873031   |
| C | 6.58710911  | -6.35639144  | -4.74495003  | Cu | 4.97913592  | -9.21537307  | -0.87915338  |
| H | 6.88483229  | -7.36208088  | -4.44685076  | O  | 7.43494022  | -10.12692370 | -3.87909385  |
| C | 7.58702510  | -5.65618572  | -5.61935995  | H  | 7.89067405  | -10.88712592 | -3.45229211  |
| O | 8.67417632  | -6.10325514  | -5.94626333  | H  | 8.11911843  | -9.43087936  | -3.91113807  |
| C | 7.13016405  | -4.28078631  | -6.11010883  | O  | 3.02616370  | -8.70362685  | -0.69691624  |
| O | 7.93000509  | -3.35352310  | -6.18767311  | H  | 2.58373360  | -8.34923600  | -1.50710295  |
| C | 5.72104197  | -4.16766730  | -6.43200988  | H  | 2.38483951  | -9.14522769  | -0.07038133  |
| H | 5.42813618  | -3.25335952  | -6.93418192  | O  | 4.92680668  | -8.88726403  | -2.76461426  |
| C | -0.78293684 | -1.39034335  | -3.47014791  | H  | 5.73215476  | -9.23645691  | -3.18733621  |
| H | -1.03415192 | -1.14651880  | -2.42814525  | H  | 6.45044115  | -5.75381494  | -3.83058434  |
| H | -0.78251680 | -0.44560118  | -4.02223089  | O  | 2.70284691  | -7.45429271  | -3.07213040  |
| C | 0.58951062  | -2.01466482  | -3.53757799  | H  | 3.52075746  | -8.01168444  | -3.21402769  |
| C | 0.99842499  | -3.00738699  | -2.63837958  | H  | 2.07308187  | -7.69359056  | -3.77324422  |
| H | 0.29258364  | -3.37023501  | -1.89711168  | C  | 14.38297590 | -7.43836230  | -0.50579197  |
| C | 2.29465726  | -3.51691024  | -2.64793285  | C  | 6.98154840  | 2.23364417   | -5.65516096  |
| H | 2.59565483  | -4.29768421  | -1.95766086  | C  | 4.20168359  | -7.70906077  | -10.29403578 |
| C | 3.21995918  | -2.99937746  | -3.55782385  | C  | 2.64556986  | -5.85379954  | -7.29851792  |
| O | 4.52464414  | -3.44305940  | -3.49734809  | C  | -1.90286761 | -2.27897455  | -4.03754686  |
| H | 5.09122780  | -2.74822677  | -3.89123235  | C  | 10.94466338 | -8.75162324  | 1.53924497   |
| C | 2.81744191  | -2.06084872  | -4.51294047  | C  | 6.49837246  | -3.39376507  | 2.05824946   |
|   |             |              |              | C  | 6.48620977  | -10.84621601 | 3.87643289   |

8-, -H+

|   |             |              |              |    |             |              |              |
|---|-------------|--------------|--------------|----|-------------|--------------|--------------|
| C | 14.56438953 | -7.90987584  | -1.94986567  | H  | 3.48360481  | -1.91695339  | -5.22511591  |
| H | 14.97206648 | -8.92349448  | -1.94361878  | C  | 1.46839078  | -1.70869509  | -4.48067610  |
| H | 15.30521364 | -7.26817700  | -2.42841974  | H  | 1.13910526  | -1.11339920  | -5.32905643  |
| C | 13.25019520 | -7.93425792  | -2.68111012  | C  | 10.51026384 | -8.45005986  | 0.08528701   |
| C | 12.65069201 | -6.78346128  | -3.20477263  | H  | 11.27174117 | -8.85426990  | -0.58360532  |
| H | 13.16364972 | -5.82677270  | -3.14978262  | H  | 10.50778597 | -7.36825088  | -0.07341863  |
| C | 11.37282331 | -6.84100994  | -3.75104003  | C  | 9.16098696  | -8.99715686  | -0.25308770  |
| H | 10.89350052 | -5.93345089  | -4.09989593  | N  | 8.91652578  | -10.31541863 | -0.61743028  |
| C | 10.68130447 | -8.05830223  | -3.79049944  | H  | 9.61355743  | -11.04736645 | -0.73390312  |
| O | 9.41773740  | -8.15435515  | -4.28770457  | C  | 7.58653789  | -10.46515841 | -0.80945306  |
| H | 9.19060207  | -7.31565571  | -4.73593072  | H  | 7.11491540  | -11.37871827 | -1.12545786  |
| C | 11.27339310 | -9.22175045  | -3.29833131  | N  | 6.96452572  | -9.32316989  | -0.58310271  |
| H | 10.71334610 | -10.15067610 | -3.33088891  | C  | 7.93059520  | -8.39734192  | -0.24677406  |
| C | 12.54430648 | -9.14091752  | -2.74216089  | H  | 7.67943326  | -7.37598546  | -0.01566584  |
| H | 12.99330141 | -10.00978716 | -2.27426656  | C  | 5.13296063  | -3.78403951  | 1.43666782   |
| C | 5.94045395  | 1.21811074   | -5.09790286  | H  | 4.70828782  | -2.90384019  | 0.93820495   |
| H | 4.99264273  | 1.33479719   | -5.63138922  | H  | 4.44937709  | -4.04924140  | 2.24802026   |
| H | 5.75196565  | 1.43876491   | -4.04375936  | C  | 5.21609715  | -4.93392301  | 0.49233921   |
| C | 6.33739911  | -0.26998982  | -5.18823570  | N  | 5.18927533  | -4.81840446  | -0.88546568  |
| O | 5.69786398  | -1.10331766  | -4.56107532  | H  | 5.11095280  | -3.97739145  | -1.45788479  |
| O | 7.33655967  | -0.60278938  | -6.00470115  | C  | 5.20234326  | -6.06460935  | -1.41434952  |
| H | 7.46713616  | -1.58668903  | -6.00409887  | H  | 5.14138180  | -6.26812316  | -2.47002530  |
| C | 5.27336481  | -8.69326164  | -9.78175120  | N  | 5.24390587  | -6.96952076  | -0.45432803  |
| H | 5.95770458  | -8.90342754  | -10.60244413 | C  | 5.24394501  | -6.28352119  | 0.73708131   |
| H | 4.79307352  | -9.62905407  | -9.49525762  | H  | 5.25730241  | -6.79720846  | 1.68754159   |
| C | 6.09111268  | -8.08435071  | -8.63589461  | C  | 5.97593821  | -10.22538613 | 2.57278579   |
| O | 6.85091058  | -7.12059524  | -8.80638526  | H  | 6.83501720  | -9.86811919  | 1.99688499   |
| N | 5.94165394  | -8.67952447  | -7.43880006  | H  | 5.37641564  | -9.34150179  | 2.82964657   |
| H | 6.41012082  | -8.27545926  | -6.63858496  | C  | 5.12620042  | -11.14151646 | 1.72959757   |
| H | 5.22016764  | -9.38285191  | -7.28364154  | N  | 4.65288579  | -10.74210480 | 0.48225763   |
| C | 3.27661952  | -4.83768503  | -6.32367651  | C  | 3.88599939  | -11.72303242 | 0.02076104   |
| H | 3.20429384  | -3.83987651  | -6.76329256  | H  | 3.35507997  | -11.70592929 | -0.91752611  |
| H | 2.68311169  | -4.82581709  | -5.39922408  | N  | 3.83662312  | -12.73710227 | 0.90270253   |
| C | 4.69622978  | -5.09929171  | -5.98855383  | H  | 3.35197436  | -13.63459194 | 0.76519143   |
| C | 5.07117084  | -6.27893641  | -5.16786260  | C  | 4.61397184  | -12.39014450 | 1.98788629   |
| O | 4.20502622  | -7.03670368  | -4.67197012  | H  | 4.68804867  | -13.02576432 | 2.85808697   |
| C | 6.48098888  | -6.53147383  | -4.95402136  | Cu | 4.95975896  | -9.04623108  | -0.70567308  |
| H | 6.76672218  | -7.42764284  | -4.41105787  | O  | 7.46340260  | -10.18001261 | -3.84344915  |
| C | 7.38238259  | -5.63203652  | -5.42549157  | H  | 7.95418326  | -10.95102347 | -3.47339382  |
| O | 8.71809041  | -5.80202627  | -5.34526767  | H  | 8.12630184  | -9.46798374  | -3.84286148  |
| C | 7.00661974  | -4.34231104  | -6.02753194  | O  | 3.00261835  | -8.60027419  | -0.61952449  |
| O | 7.92120989  | -3.49584534  | -6.22043273  | H  | 2.54206277  | -8.37961739  | -1.46783324  |
| C | 5.62900683  | -4.17333632  | -6.35146911  | H  | 2.37843967  | -9.09470326  | -0.00563588  |
| H | 5.35244160  | -3.27832704  | -6.89892819  | O  | 4.80270296  | -9.35410158  | -2.72548844  |
| C | -0.80796646 | -1.37149235  | -3.45978088  | H  | 4.74779719  | -8.58947192  | -3.33193854  |
| H | -1.09734439 | -1.08947431  | -2.43814019  | H  | 9.08171129  | -4.95858156  | -5.71219876  |
| H | -0.78780369 | -0.44684349  | -4.04569139  | O  | 1.98424419  | -7.35655845  | -2.88651626  |
| C | 0.56828963  | -1.98802113  | -3.44660850  | H  | 2.75429378  | -7.13314056  | -3.43965671  |
| C | 1.01227108  | -2.77876650  | -2.38075137  | H  | 1.29820607  | -7.57429678  | -3.55242252  |
| H | 0.32833181  | -3.00333655  | -1.56517512  | C  | 14.38677902 | -7.43807369  | -0.50115470  |
| C | 2.32186681  | -3.25087600  | -2.32227221  | C  | 6.98009276  | 2.22973881   | -5.65951424  |
| H | 2.66092504  | -3.85206910  | -1.48492577  | C  | 4.19599332  | -7.70992456  | -10.29637784 |
| C | 3.21779388  | -2.90967383  | -3.33786695  | C  | 2.63618395  | -5.85552279  | -7.29389791  |
| O | 4.52624681  | -3.31928045  | -3.23376013  | C  | -1.90785270 | -2.28018725  | -4.03525166  |
| H | 5.08163741  | -2.70077403  | -3.75421137  | C  | 10.94731101 | -8.75339611  | 1.54086709   |
| C | 2.78100293  | -2.16515729  | -4.43752087  | C  | 6.49538191  | -3.39503117  | 2.05850352   |
|   |             |              |              | C  | 6.48461265  | -10.84285511 | 3.87394728   |



9-, -H+

|   |             |              |              |    |             |              |              |
|---|-------------|--------------|--------------|----|-------------|--------------|--------------|
| C | 14.52982654 | -7.90676306  | -1.95966234  | H  | 3.49213413  | -1.89316878  | -5.23342912  |
| H | 14.95327794 | -8.91456311  | -1.96325419  | C  | 1.47632370  | -1.70267118  | -4.49079670  |
| H | 15.25326618 | -7.25357287  | -2.44999127  | H  | 1.14993646  | -1.08928111  | -5.32744003  |
| C | 13.19594246 | -7.94772339  | -2.66771258  | C  | 10.48536652 | -8.42901793  | 0.09117562   |
| C | 12.59419812 | -6.81423959  | -3.22844182  | H  | 11.22379462 | -8.87155474  | -0.57722662  |
| H | 13.11437105 | -5.85967643  | -3.21957746  | H  | 10.50239789 | -7.34617428  | -0.06870226  |
| C | 11.30327787 | -6.87910539  | -3.74887065  | C  | 9.13791078  | -8.97841748  | -0.22938829  |
| H | 10.82711337 | -5.98755610  | -4.14138358  | N  | 8.92559551  | -10.26202523 | -0.59659391  |
| C | 10.59676826 | -8.08808547  | -3.71509980  | H  | 7.45191941  | -1.63518204  | -5.95875046  |
| O | 9.30625851  | -8.18266453  | -4.16619852  | C  | 7.60208807  | -10.36095421 | -0.72789744  |
| H | 9.11070802  | -7.42562889  | -4.77206969  | H  | 7.08046335  | -11.26487370 | -1.00630093  |
| C | 11.18970511 | -9.23695254  | -3.19067070  | N  | 6.92307379  | -9.19020157  | -0.47967610  |
| H | 10.61943910 | -10.15769118 | -3.13450446  | C  | 7.87957888  | -8.29768231  | -0.17010936  |
| C | 12.47513114 | -9.14832490  | -2.66668653  | H  | 7.66234102  | -7.26943272  | 0.08267704   |
| H | 12.91289847 | -10.00832665 | -2.17021067  | C  | 5.12911744  | -3.78831372  | 1.44360534   |
| C | 5.95630545  | 1.20336333   | -5.09392635  | H  | 4.70042224  | -2.90555224  | 0.95444468   |
| H | 5.01251726  | 1.32791738   | -5.62968927  | H  | 4.45033341  | -4.06214602  | 2.25596248   |
| H | 5.76739379  | 1.43376549   | -4.04238733  | C  | 5.19899155  | -4.92987771  | 0.48543402   |
| C | 6.33575583  | -0.29282938  | -5.17455870  | N  | 5.14475162  | -4.79679237  | -0.88954018  |
| O | 5.67834116  | -1.10920786  | -4.53854129  | H  | 5.08741585  | -3.94661993  | -1.45207800  |
| O | 7.32169495  | -0.64336569  | -5.98629970  | C  | 5.09845234  | -6.03261224  | -1.43758003  |
| H | 6.74268496  | -6.96872745  | -3.96990034  | H  | 4.99579027  | -6.22005034  | -2.49241434  |
| C | 5.32501032  | -8.64238835  | -9.72322735  | N  | 5.12927207  | -6.95220271  | -0.48911129  |
| H | 6.01573260  | -8.86721361  | -10.53673568 | C  | 5.18836311  | -6.28364784  | 0.71320295   |
| H | 4.86347508  | -9.57133150  | -9.39433417  | H  | 5.21358584  | -6.81390637  | 1.65462240   |
| C | 6.14128780  | -8.11350450  | -8.52857818  | C  | 5.99944974  | -10.23210439 | 2.55795903   |
| O | 6.44102216  | -8.83615408  | -7.59887332  | H  | 6.86666131  | -9.88079906  | 1.99175022   |
| N | 6.70308432  | -6.82202055  | -8.58944696  | H  | 5.40078811  | -9.34444499  | 2.80762398   |
| H | 7.15237924  | -6.56761024  | -7.71575838  | C  | 5.15179427  | -11.14492194 | 1.70884347   |
| H | 6.13729120  | -6.05085767  | -8.93720119  | N  | 4.67140742  | -10.73979194 | 0.46282879   |
| C | 3.31801744  | -4.86344543  | -6.32273213  | C  | 3.90281328  | -11.71941776 | -0.00359521  |
| H | 3.28607842  | -3.86869318  | -6.77374316  | H  | 3.35847859  | -11.68803608 | -0.93467264  |
| H | 2.71874935  | -4.81376361  | -5.40514779  | N  | 3.86157183  | -12.73793031 | 0.87251456   |
| C | 4.73626287  | -5.17778270  | -5.96895008  | H  | 3.37379880  | -13.63510157 | 0.73526952   |
| C | 5.07430250  | -6.34937661  | -5.16832988  | C  | 4.63907219  | -12.39543784 | 1.95854594   |
| O | 4.22081903  | -7.05453026  | -4.60346913  | H  | 4.72107427  | -13.03908866 | 2.82198346   |
| C | 6.53300619  | -6.71243091  | -5.01743597  | Cu | 4.95367802  | -9.00106687  | -0.61153060  |
| H | 6.68820633  | -7.64867304  | -5.57558783  | O  | 7.42993506  | -10.20615801 | -3.76079535  |
| C | 7.55430815  | -5.69929516  | -5.48856614  | H  | 7.93164849  | -10.99214661 | -3.41264710  |
| O | 8.74234741  | -6.02223730  | -5.59449218  | H  | 8.10926225  | -9.50119304  | -3.82431913  |
| C | 7.09350124  | -4.33012554  | -5.87209741  | O  | 2.98625726  | -8.80214485  | -0.76194818  |
| O | 7.89123349  | -3.37146652  | -5.95387547  | H  | 2.51387675  | -8.38282052  | -1.52411825  |
| C | 5.70335439  | -4.23591217  | -6.22742554  | H  | 2.34889867  | -9.18098921  | -0.08345968  |
| H | 5.41738092  | -3.30830586  | -6.71408397  | O  | 5.06019018  | -9.29234426  | -2.80662800  |
| C | -0.80004557 | -1.37458356  | -3.46546326  | H  | 4.73641001  | -8.62956227  | -3.44584355  |
| H | -1.08297599 | -1.09430813  | -2.44163593  | H  | 5.93921022  | -9.61523746  | -3.13353405  |
| H | -0.78096343 | -0.44942978  | -4.04999305  | O  | 1.96439990  | -7.33105925  | -2.88493452  |
| C | 0.57499891  | -1.99516265  | -3.46122330  | H  | 2.70288433  | -7.06057987  | -3.45915824  |
| C | 1.01617859  | -2.81038327  | -2.41182234  | H  | 1.26946384  | -7.58048877  | -3.53077370  |
| H | 0.33136786  | -3.05146221  | -1.60132421  | C  | 14.37725796 | -7.44016817  | -0.50431672  |
| C | 2.32752152  | -3.27867669  | -2.35668310  | C  | 7.00290909  | 2.20758690   | -5.65432173  |
| H | 2.66392148  | -3.89198264  | -1.52724593  | C  | 4.22952617  | -7.69221318  | -10.26706795 |
| C | 3.22658648  | -2.91576514  | -3.36234975  | C  | 2.63543284  | -5.85957825  | -7.28770005  |
| O | 4.53893693  | -3.31595243  | -3.25771452  | C  | -1.90416801 | -2.28030914  | -4.03635338  |
| H | 5.09445590  | -2.66859549  | -3.74576483  | C  | 10.93559831 | -8.74007034  | 1.54119813   |
| C | 2.78870005  | -2.15988040  | -4.45394301  | C  | 6.49214983  | -3.39989518  | 2.06278969   |
|   |             |              |              | C  | 6.49417198  | -10.84815654 | 3.86463834   |

10-, -H+

|   |             |              |              |    |             |              |              |
|---|-------------|--------------|--------------|----|-------------|--------------|--------------|
| C | 14.53271841 | -7.90375722  | -1.96052990  | H  | 3.49107671  | -1.90567212  | -5.23002397  |
| H | 14.94831178 | -8.91478662  | -1.96686060  | C  | 1.47428012  | -1.71747680  | -4.48685383  |
| H | 15.26162742 | -7.25554382  | -2.44891206  | H  | 1.14092819  | -1.12310167  | -5.33408998  |
| C | 13.20077086 | -7.93147417  | -2.67097282  | C  | 10.52082926 | -8.43875872  | 0.08521128   |
| C | 12.59127881 | -6.78706501  | -3.20419025  | H  | 11.27870136 | -8.84943188  | -0.58337149  |
| H | 13.10395391 | -5.82937033  | -3.16988395  | H  | 10.52982851 | -7.35681677  | -0.07317595  |
| C | 11.30368100 | -6.84538173  | -3.73145188  | C  | 9.16855133  | -8.97231071  | -0.24909350  |
| H | 10.82346726 | -5.95021199  | -4.11038813  | N  | 8.91410830  | -10.29559779 | -0.58336236  |
| C | 10.60876789 | -8.06232443  | -3.74533518  | H  | 9.61035794  | -11.02894963 | -0.70619330  |
| O | 9.33241900  | -8.15687556  | -4.21657893  | C  | 7.58182913  | -10.44936633 | -0.73654476  |
| H | 9.11262336  | -7.35471823  | -4.77664392  | H  | 7.09901006  | -11.37325971 | -1.00685414  |
| C | 11.21341420 | -9.21983930  | -3.25409524  | N  | 6.96567090  | -9.29586647  | -0.52712322  |
| H | 10.65848307 | -10.15315497 | -3.26810948  | C  | 7.94127169  | -8.36503018  | -0.23131285  |
| C | 12.49278057 | -9.13775528  | -2.71418421  | H  | 7.69878292  | -7.33767102  | -0.01331809  |
| H | 12.94628221 | -10.00872309 | -2.25337392  | C  | 5.14385070  | -3.79528325  | 1.41825680   |
| C | 5.92575310  | 1.22771547   | -5.09034285  | H  | 4.72170869  | -2.91821257  | 0.91387943   |
| H | 4.97888541  | 1.34898872   | -5.62300492  | H  | 4.45365623  | -4.06264515  | 2.22336989   |
| H | 5.75247371  | 1.44543245   | -4.03201584  | C  | 5.22652537  | -4.94711522  | 0.46812233   |
| C | 6.29282017  | -0.28861450  | -5.17014976  | N  | 5.12410870  | -4.83102153  | -0.90675806  |
| O | 5.60334322  | -1.07341199  | -4.49875603  | H  | 5.05268759  | -3.98734747  | -1.48462461  |
| O | 7.22433111  | -0.68332118  | -5.95869916  | C  | 5.07374772  | -6.07137021  | -1.43917277  |
| H | 6.64314883  | -6.28940066  | -3.71728494  | H  | 4.91332461  | -6.27077831  | -2.48563167  |
| C | 5.26248703  | -8.70478636  | -9.79505080  | N  | 5.15777922  | -6.98488174  | -0.48336602  |
| H | 5.93697662  | -8.92041109  | -10.62225627 | C  | 5.24752936  | -6.29969030  | 0.70971182   |
| H | 4.77441907  | -9.63712875  | -9.51014215  | H  | 5.30576864  | -6.81740276  | 1.65657212   |
| C | 6.10565478  | -8.11432116  | -8.66177134  | C  | 5.97980458  | -10.23054547 | 2.56794014   |
| O | 6.84378999  | -7.13796417  | -8.82001726  | H  | 6.83924924  | -9.86194080  | 2.00102769   |
| N | 6.01516222  | -8.76029562  | -7.48017979  | H  | 5.36687491  | -9.35329275  | 2.82133930   |
| H | 6.54574857  | -8.39787167  | -6.70242919  | C  | 5.14105743  | -11.15112826 | 1.71630914   |
| H | 5.27987180  | -9.44449639  | -7.30753053  | N  | 4.67331743  | -10.75408166 | 0.46197137   |
| C | 3.33243844  | -4.86196579  | -6.32514289  | C  | 3.89373844  | -11.72893103 | 0.00304924   |
| H | 3.31458984  | -3.87031520  | -6.78567900  | H  | 3.34687395  | -11.69563122 | -0.92671748  |
| H | 2.72261778  | -4.79584930  | -5.41476397  | N  | 3.83801015  | -12.73835839 | 0.88779607   |
| C | 4.75026091  | -5.18336921  | -5.95079042  | H  | 3.34329163  | -13.63213078 | 0.75363742   |
| C | 5.08767080  | -6.31209602  | -5.14527964  | C  | 4.61362749  | -12.39301577 | 1.97583448   |
| O | 4.26500813  | -7.12439014  | -4.63383777  | H  | 4.67995928  | -13.02646777 | 2.84852818   |
| C | 6.55069099  | -6.50740462  | -4.79291756  | Cu | 4.96828952  | -9.03035563  | -0.64385480  |
| H | 6.81283572  | -7.56626859  | -4.88278048  | O  | 7.48237130  | -10.15658932 | -3.82065506  |
| C | 7.58099631  | -5.62929367  | -5.46760691  | H  | 7.96890637  | -10.93599666 | -3.45279254  |
| O | 8.75516109  | -6.01030010  | -5.56858026  | H  | 8.16064497  | -9.44571541  | -3.87339151  |
| C | 7.11073570  | -4.29520684  | -5.90989212  | O  | 3.00533925  | -8.88535151  | -0.83595976  |
| O | 7.91536248  | -3.33022994  | -6.04736435  | H  | 2.55807437  | -8.37606013  | -1.56562085  |
| C | 5.72571610  | -4.23086565  | -6.23468840  | H  | 2.36287383  | -9.18498398  | -0.12802206  |
| H | 5.43382566  | -3.31754081  | -6.74342136  | O  | 5.07897094  | -9.25419666  | -2.84948724  |
| C | -0.80051682 | -1.37958819  | -3.45982467  | H  | 4.77278846  | -8.55148485  | -3.46514331  |
| H | -1.08529255 | -1.10079848  | -2.43559779  | H  | 5.96861497  | -9.54401673  | -3.16047287  |
| H | -0.77796446 | -0.45207230  | -4.04027217  | O  | 2.05467337  | -7.33530523  | -2.91601168  |
| C | 0.57448568  | -2.00220497  | -3.45370776  | H  | 2.78240269  | -7.11815259  | -3.53339748  |
| C | 1.02090017  | -2.79721329  | -2.39373474  | H  | 1.31850367  | -7.55516670  | -3.52493909  |
| H | 0.33818493  | -3.04030091  | -1.58213245  | C  | 14.38329675 | -7.43922769  | -0.50427562  |
| C | 2.33607585  | -3.25247602  | -2.33425608  | C  | 6.97929279  | 2.22609087   | -5.65813281  |
| H | 2.67512407  | -3.84990947  | -1.49528800  | C  | 4.19441683  | -7.71017380  | -10.29688133 |
| C | 3.23496214  | -2.89700556  | -3.34257396  | C  | 2.64471044  | -5.85540995  | -7.29231982  |
| O | 4.54789796  | -3.28303851  | -3.22682178  | C  | -1.90682014 | -2.28056117  | -4.03650821  |
| H | 5.10299979  | -2.64652761  | -3.74159622  | C  | 10.94771679 | -8.75060758  | 1.54210330   |
| C | 2.79054674  | -2.16129300  | -4.44538278  | C  | 6.49701193  | -3.39866418  | 2.05468022   |
|   |             |              |              | C  | 6.48378899  | -10.84326757 | 3.87373691   |

11-, -H+

|   |             |              |              |    |             |              |              |
|---|-------------|--------------|--------------|----|-------------|--------------|--------------|
| C | 14.54240486 | -7.89834774  | -1.96038080  | H  | 3.47308721  | -1.82035816  | -5.26558834  |
| H | 14.97116016 | -8.90306564  | -1.96764359  | C  | 1.45517600  | -1.69446200  | -4.51212478  |
| H | 15.26091190 | -7.23860050  | -2.44804577  | H  | 1.10789921  | -1.08187734  | -5.34122185  |
| C | 13.21113279 | -7.94900129  | -2.66754513  | C  | 10.52000562 | -8.44033851  | 0.08607428   |
| C | 12.58063453 | -6.81837041  | -3.20267455  | H  | 11.27634246 | -8.85240086  | -0.58277813  |
| H | 13.08005129 | -5.85317592  | -3.18309181  | H  | 10.52833660 | -7.35857483  | -0.07226239  |
| C | 11.28758382 | -6.90180589  | -3.71374513  | C  | 9.16706473  | -8.97348045  | -0.24330062  |
| H | 10.79585705 | -6.01357044  | -4.09420738  | N  | 8.90757125  | -10.29647852 | -0.57432613  |
| C | 10.61095233 | -8.12927760  | -3.70661202  | H  | 9.60146885  | -11.03140042 | -0.70118143  |
| O | 9.32072819  | -8.24252685  | -4.14310310  | C  | 7.57445054  | -10.44732109 | -0.72022146  |
| H | 9.10068354  | -7.46691290  | -4.72104544  | H  | 7.08686140  | -11.37014791 | -0.98454412  |
| C | 11.24100998 | -9.27674305  | -3.22436703  | N  | 6.96266839  | -9.29202248  | -0.50800939  |
| H | 10.70434437 | -10.22040310 | -3.23474944  | C  | 7.94194495  | -8.36325592  | -0.21904408  |
| C | 12.52537537 | -9.16821110  | -2.70066541  | H  | 7.70270455  | -7.33603918  | 0.00238575   |
| H | 13.00277889 | -10.02497247 | -2.23825960  | C  | 5.14244608  | -3.78581454  | 1.41067205   |
| C | 5.92480045  | 1.22616528   | -5.09015729  | H  | 4.72181207  | -2.90240108  | 0.91632365   |
| H | 4.96908175  | 1.37121439   | -5.60202685  | H  | 4.45058630  | -4.06323811  | 2.21086939   |
| H | 5.75837383  | 1.44263213   | -4.03016184  | C  | 5.23013740  | -4.92607555  | 0.44737716   |
| C | 6.31021863  | -0.28785634  | -5.22026555  | N  | 5.15967603  | -4.80413646  | -0.93025840  |
| O | 5.49531772  | -1.08394670  | -4.64828313  | H  | 5.08991523  | -3.95844081  | -1.50806403  |
| O | 7.30575369  | -0.66680524  | -5.87242671  | C  | 5.13628347  | -6.04450887  | -1.46564956  |
| H | 6.74215549  | -6.95633823  | -3.97290671  | H  | 5.02071437  | -6.23966102  | -2.51711608  |
| C | 5.30457397  | -8.65424999  | -9.74489730  | N  | 5.19880796  | -6.96125299  | -0.51170827  |
| H | 5.98311990  | -8.89215903  | -10.56636633 | C  | 5.25202701  | -6.27875234  | 0.68460539   |
| H | 4.84349476  | -9.57663171  | -9.40112226  | H  | 5.28914253  | -6.79872526  | 1.63145132   |
| C | 6.14713098  | -8.11743451  | -8.57486777  | C  | 5.97896565  | -10.22783607 | 2.57058417   |
| O | 6.51822015  | -8.84707004  | -7.67794233  | H  | 6.83916123  | -9.86046112  | 2.00418838   |
| N | 6.64908773  | -6.79525040  | -8.62048249  | H  | 5.36843448  | -9.35037633  | 2.82705334   |
| H | 7.15401950  | -6.57656020  | -7.76776235  | C  | 5.13760137  | -11.14572678 | 1.71792673   |
| H | 6.00691589  | -6.03736179  | -8.84959150  | N  | 4.67184096  | -10.74775311 | 0.46265554   |
| C | 3.33923540  | -4.83781828  | -6.34825297  | C  | 3.89529976  | -11.72422670 | 0.00077248   |
| H | 3.29739774  | -3.84871018  | -6.80891841  | H  | 3.35575249  | -11.69800791 | -0.93314696  |
| H | 2.75730911  | -4.77758811  | -5.42146948  | N  | 3.84035258  | -12.73483573 | 0.88449598   |
| C | 4.76756687  | -5.14317776  | -6.02050301  | H  | 3.34742613  | -13.63028274 | 0.75014162   |
| C | 5.09089788  | -6.30082684  | -5.17735032  | C  | 4.61193052  | -12.38926902 | 1.97409481   |
| O | 4.22622669  | -6.95228723  | -4.57481690  | H  | 4.67865293  | -13.02475318 | 2.84534511   |
| C | 6.53545558  | -6.71897803  | -5.02482423  | Cu | 4.97276292  | -9.01021521  | -0.60585779  |
| H | 6.65359295  | -7.66962090  | -5.57316445  | O  | 7.41319750  | -10.20322076 | -3.77948139  |
| C | 7.58761088  | -5.76112923  | -5.53447552  | H  | 7.90778566  | -10.98633691 | -3.43051901  |
| O | 8.77169376  | -6.09333093  | -5.54460652  | H  | 8.10003589  | -9.50543397  | -3.85658433  |
| C | 7.17431839  | -4.43436046  | -6.13948685  | O  | 3.01110118  | -8.76809408  | -0.72339509  |
| O | 8.01781763  | -3.62933645  | -6.51162593  | H  | 2.54458290  | -8.36801854  | -1.50201303  |
| C | 5.74500212  | -4.25756982  | -6.36972044  | H  | 2.36620156  | -9.15986115  | -0.05941526  |
| H | 5.49411321  | -3.32938652  | -6.87306867  | O  | 5.04303577  | -9.26971646  | -2.80729161  |
| C | -0.80364057 | -1.38200796  | -3.45242631  | H  | 4.69869411  | -8.59412452  | -3.42187334  |
| H | -1.08436333 | -1.11889054  | -2.42343055  | H  | 5.91581157  | -9.57813520  | -3.15704791  |
| H | -0.78905345 | -0.44675654  | -4.02134093  | O  | 1.97527792  | -7.37051165  | -2.86530343  |
| C | 0.57343574  | -1.99661126  | -3.46806449  | H  | 2.67531094  | -6.97759724  | -3.41447804  |
| C | 1.04436350  | -2.79947028  | -2.42416081  | H  | 1.28842257  | -7.60899828  | -3.52352047  |
| H | 0.37758935  | -3.05101533  | -1.60129729  | C  | 14.38496204 | -7.43883977  | -0.50411401  |
| C | 2.36725930  | -3.24259724  | -2.38949997  | C  | 6.97556108  | 2.22792426   | -5.65592547  |
| H | 2.72309737  | -3.83983657  | -1.55546606  | C  | 4.20997121  | -7.70220784  | -10.28343926 |
| C | 3.25199689  | -2.86150892  | -3.40368618  | C  | 2.64456909  | -5.85114352  | -7.29096765  |
| O | 4.57606785  | -3.21115846  | -3.31657649  | C  | -1.90702317 | -2.28079118  | -4.03533539  |
| H | 5.10410469  | -2.51500875  | -3.81727755  | C  | 10.94862233 | -8.75145463  | 1.54162251   |
| C | 2.77482596  | -2.12503639  | -4.49625318  | C  | 6.49484487  | -3.39708668  | 2.05474617   |
|   |             |              |              | C  | 6.48342006  | -10.84349008 | 3.87390738   |

0\*-2-, -2H+

|   |             |              |              |    |             |              |              |
|---|-------------|--------------|--------------|----|-------------|--------------|--------------|
| C | 14.54214355 | -7.89961878  | -1.96469233  | H  | 3.56216860  | -2.16935612  | -5.04340643  |
| H | 14.96403353 | -8.90849842  | -1.96795873  | C  | 1.53353203  | -1.84702446  | -4.38314532  |
| H | 15.27017097 | -7.24768028  | -2.44999207  | H  | 1.26803720  | -1.26122061  | -5.26034997  |
| C | 13.21672376 | -7.94228595  | -2.68657607  | C  | 10.52412671 | -8.42948984  | 0.08031475   |
| C | 12.60183155 | -6.80779122  | -3.23407590  | H  | 11.28632947 | -8.83372436  | -0.58733938  |
| H | 13.10903780 | -5.84649425  | -3.20730437  | H  | 10.53060734 | -7.34664368  | -0.07096942  |
| C | 11.31593420 | -6.87501335  | -3.76122837  | C  | 9.17571325  | -8.96269829  | -0.25984017  |
| H | 10.83127301 | -5.98702836  | -4.14851546  | N  | 8.93205966  | -10.28793323 | -0.59876225  |
| C | 10.61566654 | -8.09530124  | -3.76356978  | H  | 9.63259124  | -11.01263556 | -0.73464979  |
| O | 9.35565091  | -8.19821878  | -4.23267815  | C  | 7.59896658  | -10.44728285 | -0.75060191  |
| H | 9.07542961  | -7.32162975  | -4.70933864  | H  | 7.12072452  | -11.37246840 | -1.02481022  |
| C | 11.23538453 | -9.24549477  | -3.25927404  | N  | 6.97881979  | -9.30062029  | -0.53156768  |
| H | 10.68361993 | -10.18122160 | -3.25741159  | C  | 7.94457963  | -8.36330996  | -0.23414998  |
| C | 12.51443274 | -9.15176802  | -2.72063132  | H  | 7.68028125  | -7.34092659  | -0.01411448  |
| H | 12.96973854 | -10.01348614 | -2.24238395  | C  | 5.10884552  | -3.85870306  | 1.47257125   |
| C | 5.94606905  | 1.22149695   | -5.08431853  | H  | 4.66256666  | -3.00087267  | 0.95740449   |
| H | 4.94593175  | 1.49827518   | -5.42058940  | H  | 4.44695882  | -4.11635218  | 2.30782375   |
| H | 5.96527636  | 1.25950139   | -3.98838143  | C  | 5.17982421  | -5.02166998  | 0.52441359   |
| C | 6.16779461  | -0.23238760  | -5.53515632  | N  | 5.08484522  | -4.87342052  | -0.84171323  |
| O | 5.21932188  | -0.95174286  | -5.78294597  | H  | 5.95938376  | -9.53543993  | -3.17863925  |
| O | 7.43472820  | -0.65252276  | -5.60627858  | C  | 5.08101605  | -6.11428281  | -1.33386758  |
| H | 7.44410957  | -1.61240075  | -5.85387034  | H  | 5.00155550  | -6.34604243  | -2.38494870  |
| C | 5.30161025  | -8.67801277  | -9.75534560  | N  | 5.16246565  | -7.06011109  | -0.38026884  |
| H | 6.00117677  | -8.87587594  | -10.56688434 | C  | 5.22240864  | -6.37249549  | 0.81307281   |
| H | 4.83748660  | -9.62333757  | -9.47220717  | H  | 5.29608403  | -6.88557780  | 1.76328029   |
| C | 6.09032908  | -8.04243062  | -8.60356904  | C  | 5.98917594  | -10.24321944 | 2.55496603   |
| O | 6.83953405  | -7.07536455  | -8.78923846  | H  | 6.85064051  | -9.88574823  | 1.98423388   |
| N | 5.91182523  | -8.60237897  | -7.39314458  | H  | 5.38211810  | -9.35967049  | 2.79395529   |
| H | 6.29457614  | -8.11437746  | -6.58573622  | C  | 5.14975635  | -11.17622505 | 1.71581910   |
| H | 5.17360739  | -9.28968031  | -7.24863989  | N  | 4.69589361  | -10.80311813 | 0.45296467   |
| C | 3.33613489  | -4.86636459  | -6.32806525  | C  | 3.91385181  | -11.77949263 | 0.01248464   |
| H | 3.29118351  | -3.86673956  | -6.76447674  | H  | 3.37182254  | -11.76128234 | -0.92058351  |
| H | 2.75296264  | -4.83722835  | -5.40054314  | N  | 3.84253949  | -12.77333435 | 0.91845466   |
| C | 4.76360618  | -5.16121512  | -5.99521221  | H  | 3.35046422  | -13.66711214 | 0.79308950   |
| C | 5.12820805  | -6.33039528  | -5.10915742  | C  | 4.61581484  | -12.41017266 | 2.00264489   |
| O | 4.21582285  | -7.04734781  | -4.61229183  | H  | 4.67291009  | -13.02433717 | 2.88988044   |
| C | 6.50291161  | -6.60334067  | -4.89791624  | Cu | 4.98048375  | -9.00617549  | -0.62017311  |
| H | 6.76101014  | -7.46688978  | -4.29211830  | O  | 7.49956423  | -10.18955666 | -3.82737001  |
| C | 7.52307267  | -5.78125664  | -5.39476674  | H  | 7.98793308  | -10.94649091 | -3.42821809  |
| O | 8.75793414  | -6.03671179  | -5.36185066  | H  | 8.17271224  | -9.47519981  | -3.91654277  |
| C | 7.10122514  | -4.42419918  | -5.96886147  | O  | 3.00448416  | -8.97244494  | -0.87678613  |
| O | 7.90657991  | -3.49924213  | -6.05272974  | H  | 2.58451140  | -8.35337329  | -1.53267192  |
| C | 5.70882469  | -4.27533468  | -6.36522881  | H  | 2.37657162  | -9.18894161  | -0.13150440  |
| H | 5.46097401  | -3.36393680  | -6.89606279  | O  | 5.05459936  | -9.30040385  | -2.87102947  |
| C | -0.77215298 | -1.38032235  | -3.46056697  | H  | 4.75120720  | -8.54977586  | -3.42980199  |
| H | -1.09211047 | -1.04034878  | -2.46529387  | O  | 2.04233606  | -7.27650329  | -2.84030664  |
| H | -0.71410388 | -0.48641012  | -4.08995782  | H  | 2.80124425  | -6.95367431  | -3.36628166  |
| C | 0.58678179  | -2.03225998  | -3.36644707  | H  | 1.39295424  | -7.53591627  | -3.52358978  |
| C | 0.97355205  | -2.77750604  | -2.24606514  | C  | 14.38239426 | -7.43585325  | -0.50942973  |
| H | 0.26590950  | -2.92158011  | -1.43030314  | C  | 6.98775268  | 2.23077102   | -5.63543348  |
| C | 2.24745875  | -3.33394752  | -2.13905243  | C  | 4.21276783  | -7.71819458  | -10.28644721 |
| H | 2.53115630  | -3.91357875  | -1.26778611  | C  | 2.64557367  | -5.85033668  | -7.30101899  |
| C | 3.18913763  | -3.12678127  | -3.16323252  | C  | -1.88217146 | -2.28295796  | -4.03073151  |
| O | 4.44380305  | -3.61884359  | -3.12995156  | C  | 10.94477249 | -8.74869711  | 1.53665878   |
| H | 4.68918657  | -3.91918332  | -2.20017697  | C  | 6.47720952  | -3.41960615  | 2.06013344   |
| C | 2.81535123  | -2.37260569  | -4.28684478  | C  | 6.48629716  | -10.84428313 | 3.86571252   |

1<sup>2-</sup>, -2H<sup>+</sup>

|   |             |              |              |    |             |              |              |
|---|-------------|--------------|--------------|----|-------------|--------------|--------------|
| C | 14.55210106 | -7.89745313  | -1.96642387  | H  | 3.51247987  | -2.09034149  | -5.18207017  |
| H | 14.99824464 | -8.89451818  | -1.96781179  | C  | 1.50255894  | -1.80298624  | -4.46139844  |
| H | 15.25719655 | -7.22640581  | -2.45894380  | H  | 1.19548279  | -1.23785842  | -5.34009832  |
| C | 13.22217979 | -7.98487802  | -2.67092440  | C  | 10.51101402 | -8.43785374  | 0.07944287   |
| C | 12.57210865 | -6.87849389  | -3.23491785  | H  | 11.26128092 | -8.85523443  | -0.59232704  |
| H | 13.06473161 | -5.90927922  | -3.25742754  | H  | 10.52722336 | -7.35598732  | -0.07996362  |
| C | 11.27457702 | -6.98690523  | -3.72331967  | C  | 9.15448074  | -8.95863314  | -0.24808859  |
| H | 10.76721119 | -6.12240669  | -4.13430818  | N  | 8.89277272  | -10.28205419 | -0.57879426  |
| C | 10.59213346 | -8.21645485  | -3.65444547  | H  | 9.58550192  | -11.01329941 | -0.71896004  |
| O | 9.31202976  | -8.33947092  | -4.05844910  | C  | 7.55837741  | -10.42423934 | -0.73306155  |
| H | 9.05145779  | -7.51255113  | -4.64291365  | H  | 7.06735811  | -11.34482612 | -0.99835007  |
| C | 11.24885199 | -9.34074401  | -3.13972833  | N  | 6.95337970  | -9.26736045  | -0.52215179  |
| H | 10.71198235 | -10.28324985 | -3.08653870  | C  | 7.93141740  | -8.34338858  | -0.22704402  |
| C | 12.54239630 | -9.20763483  | -2.64563183  | H  | 7.68034992  | -7.31658668  | -0.01100283  |
| H | 13.02792224 | -10.04245033 | -2.14827884  | C  | 5.12747268  | -3.79713443  | 1.42517682   |
| C | 5.91662858  | 1.28321036   | -5.07819640  | H  | 4.71030233  | -2.91898414  | 0.91778923   |
| H | 4.98943818  | 1.39631609   | -5.64810961  | H  | 4.43850468  | -4.05444901  | 2.23815865   |
| H | 5.69707158  | 1.56008376   | -4.04376014  | C  | 5.19244154  | -4.94202818  | 0.45335526   |
| C | 6.33062441  | -0.19466913  | -5.12070447  | N  | 5.05956947  | -4.78808578  | -0.91423834  |
| O | 5.52387787  | -0.85989396  | -4.27433921  | H  | 5.90911743  | -9.56610930  | -3.18419044  |
| O | 7.17843632  | -0.71851531  | -5.80733849  | C  | 5.04683954  | -6.03211527  | -1.40582949  |
| H | 5.72673105  | -1.81719294  | -4.23108815  | H  | 4.93494373  | -6.26360042  | -2.45349657  |
| C | 5.27485967  | -8.69904547  | -9.77811739  | N  | 5.15903816  | -6.98040534  | -0.45672528  |
| H | 5.96187346  | -8.90259838  | -10.59776706 | C  | 5.24547043  | -6.29303766  | 0.73402618   |
| H | 4.79663474  | -9.63740740  | -9.49697401  | H  | 5.33225284  | -6.80817366  | 1.68188599   |
| C | 6.08643431  | -8.08535066  | -8.63164967  | C  | 5.98211808  | -10.23534768 | 2.56577829   |
| O | 6.84074468  | -7.12254793  | -8.81708621  | H  | 6.84246865  | -9.86885053  | 1.99769075   |
| N | 5.92639961  | -8.66350508  | -7.42850253  | H  | 5.37134271  | -9.35547030  | 2.81155653   |
| H | 6.32776451  | -8.20053026  | -6.61538952  | C  | 5.14464554  | -11.15707519 | 1.71104304   |
| H | 5.18759510  | -9.34971308  | -7.28403407  | N  | 4.66659564  | -10.74839303 | 0.46711388   |
| C | 3.41957274  | -4.87400993  | -6.35903711  | C  | 3.89793562  | -11.72502200 | 0.00370258   |
| H | 3.40242456  | -3.87841518  | -6.80836912  | H  | 3.34493729  | -11.68458636 | -0.92215155  |
| H | 2.87422053  | -4.81756438  | -5.41206799  | N  | 3.85820330  | -12.75361507 | 0.87364510   |
| C | 4.85127940  | -5.25360226  | -6.10373682  | H  | 3.36923048  | -13.64773062 | 0.73325649   |
| C | 5.17837403  | -6.37190981  | -5.14492351  | C  | 4.63888274  | -12.41120266 | 1.96013850   |
| O | 4.24213805  | -6.98230723  | -4.55597782  | H  | 4.72708713  | -13.05557279 | 2.82304638   |
| C | 6.54017396  | -6.71218241  | -4.93590337  | Cu | 4.96044724  | -8.94627445  | -0.62878434  |
| H | 6.75497219  | -7.47161927  | -4.19061266  | O  | 7.42344867  | -10.27156474 | -3.80105330  |
| C | 7.59855557  | -6.07248540  | -5.59599653  | H  | 7.90562915  | -11.04081902 | -3.41563908  |
| O | 8.82243523  | -6.36584748  | -5.48279489  | H  | 8.11466058  | -9.56830835  | -3.85128449  |
| C | 7.26356922  | -4.92965044  | -6.56110606  | O  | 2.98528543  | -8.91176081  | -0.87357493  |
| O | 8.14129612  | -4.37284419  | -7.20347006  | H  | 2.55694731  | -8.31362792  | -1.54326990  |
| C | 5.84787316  | -4.56106490  | -6.69127711  | H  | 2.35813000  | -9.14594063  | -0.13448172  |
| H | 5.65521035  | -3.71080296  | -7.33494533  | O  | 5.02255927  | -9.27568746  | -2.86765351  |
| C | -0.78249314 | -1.37342486  | -3.47140818  | H  | 4.76007583  | -8.50671348  | -3.42148426  |
| H | -1.08414403 | -1.05736203  | -2.46233631  | O  | 2.02600881  | -7.25208687  | -2.85473939  |
| H | -0.74532360 | -0.46608956  | -4.08403036  | H  | 2.79344723  | -6.94096919  | -3.37537259  |
| C | 0.58898588  | -2.00286264  | -3.41770318  | H  | 1.38206052  | -7.51551954  | -3.54230588  |
| C | 1.02443790  | -2.73127465  | -2.30402907  | C  | 14.38654393 | -7.43323465  | -0.51104959  |
| H | 0.33498592  | -2.89702452  | -1.47637708  | C  | 6.99254481  | 2.24038114   | -5.64459952  |
| C | 2.32201683  | -3.23300267  | -2.21407393  | C  | 4.19718955  | -7.71646827  | -10.29156186 |
| H | 2.65057031  | -3.79262169  | -1.34431308  | C  | 2.65507820  | -5.83876941  | -7.29850785  |
| C | 3.23484505  | -2.99276516  | -3.25432484  | C  | -1.88798797 | -2.28503370  | -4.03555213  |
| O | 4.52457509  | -3.40517178  | -3.21493386  | C  | 10.94376366 | -8.75320808  | 1.53569201   |
| H | 4.75947434  | -3.76310060  | -2.29652078  | C  | 6.48799180  | -3.40188868  | 2.05813837   |
| C | 2.80178931  | -2.28994365  | -4.38955238  | C  | 6.48341759  | -10.84468559 | 3.87395305   |

2\*2-, -2H+

|   |             |              |              |    |             |              |              |
|---|-------------|--------------|--------------|----|-------------|--------------|--------------|
| C | 14.53676417 | -7.91890986  | -1.96005055  | H  | 3.53458918  | -1.81625482  | -5.23483224  |
| H | 14.95151946 | -8.93066918  | -1.95358726  | C  | 1.51423839  | -1.65797286  | -4.49316414  |
| H | 15.27009716 | -7.27521350  | -2.44978583  | H  | 1.19844743  | -0.98862911  | -5.29076522  |
| C | 13.21338459 | -7.95669207  | -2.68558602  | C  | 10.46017277 | -8.43219389  | 0.09165581   |
| C | 12.63206945 | -6.82536347  | -3.26919281  | H  | 11.19023892 | -8.87627912  | -0.58350855  |
| H | 13.16224729 | -5.87556648  | -3.26329786  | H  | 10.49773606 | -7.34983937  | -0.07177272  |
| C | 11.34948280 | -6.88168958  | -3.80891810  | C  | 9.09279204  | -8.96220913  | -0.22078960  |
| H | 10.88649068 | -5.99261347  | -4.21906800  | N  | 8.88595638  | -10.28140788 | -0.56629976  |
| C | 10.62282764 | -8.08118632  | -3.76752280  | H  | 5.97400039  | -9.53251791  | -3.16731250  |
| O | 9.35545091  | -8.16791591  | -4.24926506  | C  | 7.57310295  | -10.38748227 | -0.71445007  |
| H | 9.10410606  | -7.30942452  | -4.70576597  | H  | 7.05578192  | -11.29799680 | -0.98611900  |
| C | 11.19440697 | -9.22700531  | -3.20637828  | N  | 6.90723303  | -9.22263827  | -0.50503660  |
| H | 10.59950245 | -10.12930594 | -3.11278646  | C  | 7.88318161  | -8.29984127  | -0.18824766  |
| C | 12.47346137 | -9.14615423  | -2.66955818  | H  | 7.64686097  | -7.26983062  | 0.03106074   |
| H | 12.88614127 | -9.99904489  | -2.13936467  | C  | 5.12368984  | -3.79574767  | 1.45135656   |
| C | 5.95561650  | 1.20365991   | -5.11708455  | H  | 4.68939377  | -2.90940614  | 0.97201498   |
| H | 5.01011841  | 1.31988402   | -5.65395067  | H  | 4.45095424  | -4.07524376  | 2.26717796   |
| H | 5.76238330  | 1.44337528   | -4.06776933  | C  | 5.18494668  | -4.93216335  | 0.48541133   |
| C | 6.34238360  | -0.28771529  | -5.17844146  | N  | 5.19279206  | -4.79008138  | -0.89154234  |
| O | 5.70606479  | -1.08726438  | -4.50573627  | H  | 5.18008263  | -3.93721551  | -1.44545284  |
| O | 7.31038576  | -0.64611623  | -6.01054006  | C  | 5.14320991  | -6.02405332  | -1.44839641  |
| H | 7.44283854  | -1.63697571  | -5.97589551  | H  | 5.11927346  | -6.20102968  | -2.51045208  |
| C | 5.29882201  | -8.67349040  | -9.75377806  | N  | 5.10185956  | -6.94674658  | -0.50544314  |
| H | 5.99939349  | -8.87308350  | -10.56344774 | C  | 5.12690089  | -6.28582075  | 0.70053958   |
| H | 4.83078163  | -9.61656716  | -9.47132511  | H  | 5.11424535  | -6.82369140  | 1.63770220   |
| C | 6.08736284  | -8.03993195  | -8.59992275  | C  | 6.00836803  | -10.23275327 | 2.54914528   |
| O | 6.83162589  | -7.06644756  | -8.78035600  | H  | 6.87867753  | -9.90618536  | 1.97182422   |
| N | 5.90712141  | -8.60272287  | -7.39301581  | H  | 5.42186605  | -9.33219657  | 2.78034886   |
| H | 6.32836903  | -8.15496306  | -6.58463774  | C  | 5.14751823  | -11.14604673 | 1.71377867   |
| H | 5.19778801  | -9.32030349  | -7.24975666  | N  | 4.64488188  | -10.73172163 | 0.48398343   |
| C | 3.33095952  | -4.83478571  | -6.34711431  | C  | 3.88773424  | -11.71320724 | 0.01428471   |
| H | 3.26295406  | -3.83763575  | -6.78961231  | H  | 3.33433516  | -11.67196365 | -0.91122093  |
| H | 2.75656674  | -4.81570646  | -5.41331355  | N  | 3.86889085  | -12.75064401 | 0.87381459   |
| C | 4.76277948  | -5.10711779  | -6.02274691  | H  | 3.39843741  | -13.65236954 | 0.72593437   |
| C | 5.13511264  | -6.27098242  | -5.12318466  | C  | 4.65828711  | -12.40812597 | 1.95524287   |
| O | 4.21412671  | -6.98013028  | -4.62906988  | H  | 4.76873947  | -13.06540746 | 2.80511914   |
| C | 6.50260741  | -6.52222128  | -4.89798553  | Cu | 4.99266651  | -9.01613701  | -0.67196698  |
| H | 6.77656716  | -7.38395526  | -4.29619432  | O  | 7.46457641  | -10.16154112 | -3.83199551  |
| C | 7.51876588  | -5.68621224  | -5.40152431  | H  | 7.90874592  | -10.88008309 | -3.32053055  |
| O | 8.74610431  | -5.92350551  | -5.38615443  | H  | 8.13939918  | -9.44819772  | -3.85867134  |
| C | 7.07556734  | -4.32722482  | -5.95690842  | O  | 2.98758198  | -8.89889613  | -0.86677239  |
| O | 7.85292117  | -3.37224701  | -5.96577674  | H  | 2.52951170  | -8.35700642  | -1.55279674  |
| C | 5.69575544  | -4.20962116  | -6.39910019  | H  | 2.36093169  | -9.18885219  | -0.14771130  |
| H | 5.43793759  | -3.32193785  | -6.96649882  | O  | 5.05780361  | -9.26235881  | -2.89737223  |
| C | -0.77160523 | -1.39188584  | -3.47618797  | H  | 4.79233654  | -8.51843250  | -3.47545778  |
| H | -1.04733037 | -1.12150681  | -2.44640696  | O  | 1.99978909  | -7.20709678  | -2.90142572  |
| H | -0.75709471 | -0.45939522  | -4.05005203  | H  | 2.78369995  | -6.99760633  | -3.44751281  |
| C | 0.60193582  | -2.01401919  | -3.49466208  | H  | 1.33667525  | -7.47417185  | -3.57101064  |
| C | 1.03025686  | -2.89648467  | -2.49631609  | C  | 14.37791488 | -7.44233245  | -0.50731129  |
| H | 0.33527773  | -3.19358760  | -1.71343603  | C  | 7.00040389  | 2.19990655   | -5.68555017  |
| C | 2.33652521  | -3.37739614  | -2.46231973  | C  | 4.21308238  | -7.71131197  | -10.28869285 |
| H | 2.66492485  | -4.06209414  | -1.68705427  | C  | 2.64782075  | -5.83905964  | -7.30245683  |
| C | 3.24989402  | -2.94964524  | -3.43000230  | C  | -1.88084578 | -2.29053548  | -4.04808817  |
| O | 4.55054041  | -3.36467882  | -3.33012639  | C  | 10.92764371 | -8.74275448  | 1.53575532   |
| H | 5.11526273  | -2.73331666  | -3.82585481  | C  | 6.49070026  | -3.40810512  | 2.06581325   |
| C | 2.82545830  | -2.12168411  | -4.47461023  | C  | 6.48657389  | -10.83791188 | 3.86825242   |

3^2-, -2H+

|   |             |              |              |    |             |              |              |
|---|-------------|--------------|--------------|----|-------------|--------------|--------------|
| C | 14.54766687 | -7.89198243  | -1.96904293  | H  | 3.42160330  | -1.83206983  | -5.41939560  |
| H | 14.96443727 | -8.90258374  | -1.97514296  | C  | 1.46038990  | -1.62999022  | -4.54739531  |
| H | 15.27994287 | -7.24069904  | -2.44883772  | H  | 1.10670045  | -0.95034178  | -5.32070359  |
| C | 13.22472570 | -7.92399532  | -2.69436949  | C  | 10.52758345 | -8.43246401  | 0.07603912   |
| C | 12.59433488 | -6.77874676  | -3.20113393  | H  | 11.28352982 | -8.85112024  | -0.59140021  |
| H | 13.09040515 | -5.81289149  | -3.14184430  | H  | 10.54772989 | -7.35030204  | -0.07969864  |
| C | 11.31158121 | -6.84509395  | -3.73555337  | C  | 9.17401273  | -8.95166428  | -0.26063768  |
| H | 10.81581866 | -5.94944343  | -4.09063728  | N  | 8.92161724  | -10.27490830 | -0.60170096  |
| C | 10.62912855 | -8.07469335  | -3.78381402  | H  | 9.61761889  | -11.00471640 | -0.73530723  |
| O | 9.37092848  | -8.17899852  | -4.25770379  | C  | 7.58608368  | -10.42405056 | -0.75203749  |
| H | 9.08711052  | -7.29813137  | -4.71816373  | H  | 7.09915425  | -11.34628130 | -1.02204793  |
| C | 11.25984995 | -9.23225702  | -3.31237394  | N  | 6.97594453  | -9.27209310  | -0.53298442  |
| H | 10.72121764 | -10.17508368 | -3.35132627  | C  | 7.94762930  | -8.34280126  | -0.23260689  |
| C | 12.53688187 | -9.13976634  | -2.76936875  | H  | 7.68627274  | -7.31968285  | -0.01018968  |
| H | 13.00687990 | -10.00981216 | -2.32326713  | C  | 5.11156285  | -3.85924376  | 1.49278266   |
| C | 5.94605574  | 1.21636981   | -5.08526724  | H  | 4.65642095  | -3.00156638  | 0.98379914   |
| H | 4.99391529  | 1.35380084   | -5.60358946  | H  | 4.46280983  | -4.12468654  | 2.33349434   |
| H | 5.77216936  | 1.41652987   | -4.02414765  | C  | 5.18682170  | -5.00755384  | 0.53365916   |
| C | 6.31615612  | -0.27645854  | -5.21320561  | N  | 5.21231446  | -4.80527823  | -0.82507531  |
| O | 5.61005401  | -1.10007657  | -4.65688273  | H  | 5.96186067  | -9.51972123  | -3.19571862  |
| O | 7.36028782  | -0.61434792  | -5.96961019  | C  | 5.20322665  | -6.02585001  | -1.35373488  |
| H | 7.45961057  | -1.60546518  | -5.96258368  | H  | 5.21221586  | -6.22841166  | -2.41415549  |
| C | 5.29095711  | -8.68298635  | -9.76038163  | N  | 5.16686112  | -7.01553564  | -0.42413998  |
| H | 5.98661719  | -8.88545212  | -10.57366823 | C  | 5.15018846  | -6.36613554  | 0.79310319   |
| H | 4.82195244  | -9.62445033  | -9.47380469  | H  | 5.10459231  | -6.91596291  | 1.72586183   |
| C | 6.08628170  | -8.04830665  | -8.61209510  | C  | 5.98455181  | -10.24203266 | 2.55731834   |
| O | 6.84332585  | -7.08841766  | -8.80533534  | H  | 6.84282598  | -9.87602145  | 1.98660424   |
| N | 5.90616891  | -8.60029832  | -7.39948268  | H  | 5.37352338  | -9.36236316  | 2.79784569   |
| H | 6.30251920  | -8.11728587  | -6.59587994  | C  | 5.15023129  | -11.17086865 | 1.71059407   |
| H | 5.17042519  | -9.28939600  | -7.24930230  | N  | 4.69185510  | -10.77722995 | 0.45316688   |
| C | 3.35781062  | -4.85032063  | -6.35639229  | C  | 3.91645172  | -11.75090484 | -0.00294436  |
| H | 3.29792517  | -3.85162032  | -6.79508050  | H  | 3.37399330  | -11.71789096 | -0.93564847  |
| H | 2.79762864  | -4.82403773  | -5.41573248  | N  | 3.85226844  | -12.76307684 | 0.88543191   |
| C | 4.78860479  | -5.15138724  | -6.05016943  | H  | 3.36144075  | -13.65636590 | 0.74857575   |
| C | 5.14285570  | -6.30904742  | -5.13540593  | C  | 4.62474309  | -12.41258837 | 1.97645273   |
| O | 4.22312241  | -7.01517247  | -4.64577512  | H  | 4.68548152  | -13.04014146 | 2.85394035   |
| C | 6.51564357  | -6.57617530  | -4.91353100  | Cu | 4.97347470  | -8.95567845  | -0.62571834  |
| H | 6.77121237  | -7.42765388  | -4.29023804  | O  | 7.51672779  | -10.17618694 | -3.84975260  |
| C | 7.53756013  | -5.75384154  | -5.40547767  | H  | 7.99698145  | -10.93011609 | -3.43359415  |
| O | 8.77263020  | -6.00393838  | -5.36566970  | H  | 8.18994510  | -9.46255564  | -3.93274252  |
| C | 7.11648011  | -4.40666118  | -5.99677728  | O  | 2.99989253  | -8.95596634  | -0.88290155  |
| O | 7.89189006  | -3.44952288  | -6.00680538  | H  | 2.58286080  | -8.31090667  | -1.51183533  |
| C | 5.74365389  | -4.29193562  | -6.45920758  | H  | 2.38226271  | -9.17283563  | -0.13043375  |
| H | 5.50331641  | -3.40983633  | -7.04197846  | O  | 5.05233667  | -9.28991655  | -2.89901261  |
| C | -0.78061249 | -1.38954548  | -3.44330997  | H  | 4.76150097  | -8.52378272  | -3.43956207  |
| H | -1.04749872 | -1.15570522  | -2.40212822  | O  | 2.06570025  | -7.21732585  | -2.81834844  |
| H | -0.78512087 | -0.43793023  | -3.98701684  | H  | 2.84987144  | -6.89067986  | -3.30019833  |
| C | 0.60071241  | -1.99473695  | -3.50633219  | H  | 1.45782478  | -7.49483858  | -3.53177387  |
| C | 1.08053191  | -2.88045297  | -2.53082038  | C  | 14.38503554 | -7.43405117  | -0.51174521  |
| H | 0.43045840  | -3.16738767  | -1.70619968  | C  | 6.99015853  | 2.22900599   | -5.63325633  |
| C | 2.37969896  | -3.38182067  | -2.57747448  | C  | 4.20496885  | -7.71829284  | -10.29001208 |
| H | 2.78251288  | -4.04354048  | -1.81584137  | C  | 2.64852273  | -5.84121620  | -7.30507334  |
| C | 3.23027163  | -2.98517829  | -3.61550668  | C  | -1.88897861 | -2.28368500  | -4.03179401  |
| O | 4.48844590  | -3.49347645  | -3.65575348  | C  | 10.94571642 | -8.75161905  | 1.53479100   |
| H | 5.07126976  | -2.84201783  | -4.09071189  | C  | 6.48131444  | -3.41788268  | 2.06647708   |
| C | 2.75714892  | -2.12240030  | -4.61403795  | C  | 6.48683461  | -10.84433864 | 3.86777589   |

4<sup>2-</sup>, -2H<sup>+</sup>

|   |             |              |              |    |             |              |              |
|---|-------------|--------------|--------------|----|-------------|--------------|--------------|
| C | 14.54916332 | -7.89591296  | -1.96373097  | H  | 3.50186434  | -1.74051546  | -5.30704760  |
| H | 14.99436412 | -8.89344862  | -1.96644822  | C  | 1.48243661  | -1.64471976  | -4.54796396  |
| H | 15.25463929 | -7.22503527  | -2.45559249  | H  | 1.12989653  | -1.01215760  | -5.36013793  |
| C | 13.21728860 | -7.97883324  | -2.66467445  | C  | 10.51460565 | -8.43200261  | 0.08520252   |
| C | 12.56461568 | -6.86658441  | -3.21374495  | H  | 11.27059288 | -8.84173711  | -0.58542490  |
| H | 13.05539858 | -5.89589459  | -3.22187807  | H  | 10.52797805 | -7.34961816  | -0.06995821  |
| C | 11.26564857 | -6.97117333  | -3.69961208  | C  | 9.16107889  | -8.95681765  | -0.25185055  |
| H | 10.75613023 | -6.10268036  | -4.10016523  | N  | 8.90141553  | -10.28138058 | -0.57738558  |
| C | 10.58704339 | -8.20419279  | -3.64851538  | H  | 9.59625847  | -11.01332705 | -0.70789610  |
| O | 9.30835653  | -8.32590742  | -4.05660426  | C  | 7.56901246  | -10.42132590 | -0.75556621  |
| H | 9.06686724  | -7.52163681  | -4.68812175  | H  | 7.08179776  | -11.34245650 | -1.02893432  |
| C | 11.24726776 | -9.33250439  | -3.14760024  | N  | 6.95993035  | -9.26310457  | -0.56433687  |
| H | 10.71478462 | -10.27848223 | -3.11277512  | C  | 7.93823988  | -8.33964020  | -0.25963622  |
| C | 12.54089561 | -9.20299913  | -2.65292988  | H  | 7.69737182  | -7.30649042  | -0.06558320  |
| H | 13.02904176 | -10.04338255 | -2.16852137  | C  | 5.13602006  | -3.77828344  | 1.42297346   |
| C | 5.90914669  | 1.26526603   | -5.05588890  | H  | 4.70910863  | -2.88297839  | 0.95546695   |
| H | 4.96444787  | 1.40920262   | -5.59019009  | H  | 4.45262604  | -4.07686019  | 2.22347887   |
| H | 5.72904510  | 1.51607454   | -4.00681535  | C  | 5.21454495  | -4.89137624  | 0.42809537   |
| C | 6.27891833  | -0.26456312  | -5.14037703  | N  | 5.16977477  | -4.73897794  | -0.94858063  |
| O | 5.48921104  | -0.97710886  | -4.43648642  | H  | 5.12799559  | -3.88553759  | -1.51664837  |
| O | 7.20143787  | -0.67550284  | -5.85945346  | C  | 5.13455246  | -5.96682030  | -1.51290887  |
| H | 5.90608320  | -9.56414912  | -3.20441491  | H  | 5.05233995  | -6.13204962  | -2.57516437  |
| C | 5.27589388  | -8.69708843  | -9.77911144  | N  | 5.15901696  | -6.90517841  | -0.57599361  |
| H | 5.96345684  | -8.89929936  | -10.59865084 | C  | 5.20402607  | -6.24832862  | 0.63455059   |
| H | 4.79593275  | -9.63583883  | -9.50076277  | H  | 5.21553779  | -6.78941778  | 1.57076425   |
| C | 6.08734999  | -8.08853611  | -8.63090068  | C  | 5.98571189  | -10.23131430 | 2.56515039   |
| O | 6.83563994  | -7.12072922  | -8.81012136  | H  | 6.84796779  | -9.86727423  | 1.99633908   |
| N | 5.93677278  | -8.67903889  | -7.43153905  | H  | 5.37918334  | -9.34910950  | 2.81467577   |
| H | 6.33660406  | -8.21567520  | -6.61853755  | C  | 5.14176831  | -11.14291183 | 1.70666138   |
| H | 5.19688738  | -9.36378933  | -7.28813071  | N  | 4.64969362  | -10.71229077 | 0.47490285   |
| C | 3.43855106  | -4.87198649  | -6.36012223  | C  | 3.88218052  | -11.68466739 | -0.00129412  |
| H | 3.42771306  | -3.87842914  | -6.81429821  | H  | 3.32122719  | -11.62434439 | -0.92221794  |
| H | 2.89928751  | -4.80082071  | -5.40987223  | N  | 3.85592618  | -12.73141400 | 0.84874339   |
| C | 4.87344039  | -5.26196401  | -6.11672355  | H  | 3.37044180  | -13.62757760 | 0.70104911   |
| C | 5.21100847  | -6.36967887  | -5.15301087  | C  | 4.64358333  | -12.40394105 | 1.93575649   |
| O | 4.28567899  | -6.95852262  | -4.51507101  | H  | 4.74102564  | -13.06565240 | 2.78443546   |
| C | 6.57074291  | -6.72606865  | -4.96374463  | Cu | 4.95367998  | -8.96882929  | -0.71194277  |
| H | 6.78901506  | -7.48867896  | -4.22130517  | O  | 7.42908068  | -10.27546412 | -3.78594820  |
| C | 7.62602228  | -6.10563337  | -5.64800395  | H  | 7.92595950  | -11.04738690 | -3.41999851  |
| O | 8.84669743  | -6.41915848  | -5.55872377  | H  | 8.11379802  | -9.56562595  | -3.83950645  |
| C | 7.28351719  | -4.96473550  | -6.61248979  | O  | 2.96440668  | -8.82975162  | -0.85452853  |
| O | 8.15533218  | -4.43260237  | -7.27779684  | H  | 2.50761254  | -8.32638530  | -1.58077433  |
| C | 5.87047965  | -4.57665806  | -6.71351637  | H  | 2.33302966  | -9.14310441  | -0.14905452  |
| H | 5.68276671  | -3.71458184  | -7.34124407  | O  | 5.02143084  | -9.24995555  | -2.90235486  |
| C | -0.78121151 | -1.38367893  | -3.47350837  | H  | 4.77345311  | -8.47670955  | -3.46355520  |
| H | -1.04907322 | -1.12686284  | -2.43828281  | O  | 2.00500458  | -7.27331512  | -2.91576246  |
| H | -0.78421429 | -0.44525194  | -4.03766473  | H  | 2.76466093  | -6.97057152  | -3.45513886  |
| C | 0.60181884  | -1.98469088  | -3.51345881  | H  | 1.33945021  | -7.52058790  | -3.59108640  |
| C | 1.07623327  | -2.82183711  | -2.49990300  | C  | 14.38503987 | -7.43347353  | -0.51078493  |
| H | 0.40848519  | -3.10932368  | -1.68875319  | C  | 6.98122857  | 2.23222150   | -5.63301299  |
| C | 2.39978870  | -3.25781318  | -2.48001218  | C  | 4.20077809  | -7.71208285  | -10.29117445 |
| H | 2.75750257  | -3.88559914  | -1.67052261  | C  | 2.66036274  | -5.83725374  | -7.28978142  |
| C | 3.29089492  | -2.83499014  | -3.47582076  | C  | -1.88703110 | -2.28867320  | -4.04202639  |
| O | 4.60574985  | -3.16655636  | -3.38631325  | C  | 10.94403780 | -8.74976707  | 1.53753457   |
| H | 5.13990963  | -2.44090233  | -3.87654354  | C  | 6.49365302  | -3.40270511  | 2.06351280   |
| C | 2.80397716  | -2.06788492  | -4.54712122  | C  | 6.48593306  | -10.84514818 | 3.87335053   |



5\*2-, -2H+

|   |             |              |              |    |             |              |              |
|---|-------------|--------------|--------------|----|-------------|--------------|--------------|
| C | 14.52244549 | -7.89338422  | -1.97650456  | H  | 3.52239288  | -1.89081871  | -5.24417572  |
| H | 14.94239073 | -8.90302898  | -1.98718185  | C  | 1.50932851  | -1.69416030  | -4.49010463  |
| H | 15.24769216 | -7.24089785  | -2.46707915  | H  | 1.18682252  | -1.05801560  | -5.31154702  |
| C | 13.18621784 | -7.92681061  | -2.68928539  | C  | 10.50914611 | -8.44562470  | 0.07918506   |
| C | 12.55402042 | -6.78592465  | -3.20448555  | H  | 11.29249339 | -8.81476108  | -0.58628675  |
| H | 13.05646228 | -5.82197555  | -3.16703210  | H  | 10.46694299 | -7.36266456  | -0.07072455  |
| C | 11.26113855 | -6.84856068  | -3.71832793  | C  | 9.18819823  | -9.03850623  | -0.28409513  |
| H | 10.77048723 | -5.95195307  | -4.07907004  | N  | 9.00810183  | -10.36417144 | -0.64991095  |
| C | 10.55536143 | -8.06879803  | -3.72936098  | H  | 9.73834024  | -11.06226936 | -0.76406234  |
| O | 9.28839598  | -8.17852110  | -4.16505496  | C  | 7.68718140  | -10.56358689 | -0.87925842  |
| H | 8.99219181  | -7.30981104  | -4.60063278  | H  | 7.26413526  | -11.49017934 | -1.23020761  |
| C | 11.19775819 | -9.22610889  | -3.26422290  | N  | 7.01469426  | -9.45021762  | -0.67759134  |
| H | 10.64162331 | -10.15932320 | -3.26973467  | C  | 7.93325778  | -8.49020814  | -0.31066515  |
| C | 12.48150958 | -9.13700519  | -2.73827377  | H  | 7.63079438  | -7.47714290  | -0.09917900  |
| H | 12.94624968 | -10.00768756 | -2.28731195  | C  | 5.11942365  | -3.77165006  | 1.45676104   |
| C | 5.93604372  | 1.22540381   | -5.08379006  | H  | 4.71650441  | -2.89650678  | 0.93081548   |
| H | 4.99536272  | 1.34351003   | -5.63013111  | H  | 4.42852326  | -3.99400157  | 2.27612816   |
| H | 5.73446448  | 1.45505254   | -4.03406169  | C  | 5.17526889  | -4.95459624  | 0.55741507   |
| C | 6.32546400  | -0.26922586  | -5.15081607  | N  | 5.22482631  | -4.89644398  | -0.82471233  |
| O | 5.68387879  | -1.06767038  | -4.48252018  | H  | 5.20813293  | -4.07552814  | -1.42459281  |
| O | 7.30081997  | -0.62740545  | -5.97526350  | C  | 5.22392418  | -6.17155286  | -1.29476130  |
| H | 7.43805422  | -1.62122172  | -5.93167671  | H  | 5.24755440  | -6.44513418  | -2.33770218  |
| C | 5.28849857  | -8.67407783  | -9.74621783  | N  | 5.17582627  | -7.03560233  | -0.29618010  |
| H | 5.99007774  | -8.88141100  | -10.55365526 | C  | 5.14384165  | -6.29431028  | 0.85589787   |
| H | 4.81798142  | -9.61342339  | -9.45679542  | H  | 5.10990433  | -6.76253586  | 1.83091966   |
| C | 6.07032440  | -8.02601180  | -8.59325964  | C  | 5.99234026  | -10.23869323 | 2.56001530   |
| O | 6.84331188  | -7.07914500  | -8.79846377  | H  | 6.85184896  | -9.89581041  | 1.97777182   |
| N | 5.85128212  | -8.54194055  | -7.37372778  | H  | 5.39610231  | -9.34686056  | 2.79857937   |
| H | 6.24993059  | -8.07263444  | -6.56350140  | C  | 5.13349620  | -11.15534325 | 1.72526988   |
| H | 5.14300991  | -9.25928682  | -7.22596552  | N  | 4.62431774  | -10.73218047 | 0.50531569   |
| C | 3.32534969  | -4.74099138  | -6.44416236  | C  | 3.86177684  | -11.71285347 | 0.04112182   |
| H | 3.28579160  | -3.78910675  | -6.98146569  | H  | 3.28837984  | -11.66243725 | -0.87411034  |
| H | 2.73772307  | -4.62859143  | -5.52660527  | N  | 3.85133356  | -12.75814203 | 0.89477189   |
| C | 4.73758418  | -5.00485073  | -6.06066456  | H  | 3.37659388  | -13.65636782 | 0.74872128   |
| C | 5.02458896  | -6.12595016  | -5.08463362  | C  | 4.65013703  | -12.42148284 | 1.97111665   |
| O | 4.03386843  | -6.70043695  | -4.57599960  | H  | 4.76206479  | -13.08105245 | 2.81886425   |
| C | 6.37886768  | -6.46535852  | -4.83259391  | Cu | 4.97281608  | -9.20315074  | -0.98115953  |
| H | 6.56118619  | -7.33634425  | -4.20426711  | O  | 7.37389207  | -10.40500801 | -3.81120474  |
| C | 7.43593844  | -5.67955155  | -5.32211634  | H  | 8.03804555  | -11.05211201 | -3.47247700  |
| O | 8.66529279  | -5.95109343  | -5.28328340  | H  | 7.77357506  | -9.53321299  | -3.66134213  |
| C | 7.06065666  | -4.31217928  | -5.90617931  | O  | 2.95209566  | -8.99036331  | -0.97185865  |
| O | 7.85855302  | -3.37119630  | -5.87859494  | H  | 2.46969373  | -8.41320215  | -1.60741407  |
| C | 5.71211157  | -4.15363013  | -6.42918239  | H  | 2.37679753  | -9.22818285  | -0.19803146  |
| H | 5.52399395  | -3.28515354  | -7.05080590  | O  | 5.19363356  | -8.80983623  | -2.80974397  |
| C | -0.77236133 | -1.39024123  | -3.46627890  | H  | 4.43783136  | -8.32781090  | -3.18597255  |
| H | -1.04730596 | -1.11298990  | -2.43837966  | O  | 1.90091905  | -7.19922783  | -2.86157873  |
| H | -0.75043897 | -0.46000526  | -4.04498689  | H  | 2.67813937  | -6.83679334  | -3.33221904  |
| C | 0.60167964  | -2.01957900  | -3.47627804  | H  | 1.30809046  | -7.45594039  | -3.59801040  |
| C | 1.03600129  | -2.87511041  | -2.45577580  | C  | 14.38236071 | -7.43376864  | -0.51543332  |
| H | 0.34282375  | -3.16206179  | -1.66746724  | C  | 6.98750044  | 2.22994649   | -5.63659877  |
| C | 2.34455023  | -3.35008101  | -2.41171527  | C  | 4.20345832  | -7.70971586  | -10.28864684 |
| H | 2.67875697  | -4.00959617  | -1.61637314  | C  | 2.64757937  | -5.82804424  | -7.31136905  |
| C | 3.25405712  | -2.95035586  | -3.39558357  | C  | -1.88970153 | -2.28464720  | -4.03689841  |
| O | 4.55435471  | -3.35558411  | -3.29048764  | C  | 10.94298587 | -8.74988614  | 1.53685398   |
| H | 5.11315557  | -2.74117132  | -3.81180912  | C  | 6.49295284  | -3.39819112  | 2.06669728   |
| C | 2.81963253  | -2.15807043  | -4.46394316  | C  | 6.48900648  | -10.84384632 | 3.87285564   |

6^2-, -2H+

|   |             |              |              |    |             |              |              |
|---|-------------|--------------|--------------|----|-------------|--------------|--------------|
| C | 14.54095669 | -7.89639808  | -1.96823229  | H  | 3.50366284  | -1.84883094  | -5.26982662  |
| H | 14.95981506 | -8.90594003  | -1.97378408  | C  | 1.49575102  | -1.67098543  | -4.50059838  |
| H | 15.26938340 | -7.24441580  | -2.45298410  | H  | 1.16890179  | -1.01796144  | -5.30667433  |
| C | 13.21380870 | -7.93153221  | -2.68749464  | C  | 10.52603856 | -8.45859373  | 0.07107982   |
| C | 12.59173300 | -6.78981119  | -3.20947936  | H  | 11.28940635 | -8.87691326  | -0.58668878  |
| H | 13.09460902 | -5.82681640  | -3.16305223  | H  | 10.53735820 | -7.37846653  | -0.09779285  |
| C | 11.30779998 | -6.85564772  | -3.74278060  | C  | 9.17681347  | -8.99302823  | -0.26405940  |
| H | 10.81934355 | -5.96209767  | -4.11238614  | N  | 8.90003093  | -10.32764688 | -0.53520943  |
| C | 10.61619343 | -8.07864468  | -3.76717955  | H  | 9.57902460  | -11.07993731 | -0.62683702  |
| O | 9.35145120  | -8.18014840  | -4.23939693  | C  | 7.56116629  | -10.46140510 | -0.68093684  |
| H | 9.08503751  | -7.32062606  | -4.71053406  | H  | 7.04519565  | -11.38822126 | -0.86613119  |
| C | 11.23752800 | -9.23469402  | -3.28293810  | N  | 6.97264093  | -9.28697320  | -0.54269856  |
| H | 10.68901949 | -10.17213264 | -3.29673540  | C  | 7.96246438  | -8.36475501  | -0.28771101  |
| C | 12.51591818 | -9.14336025  | -2.74251746  | H  | 7.73585582  | -7.32512445  | -0.11938616  |
| H | 12.97480608 | -10.01026946 | -2.27873836  | C  | 5.13242244  | -3.79939679  | 1.44014832   |
| C | 5.94048532  | 1.22408450   | -5.08675941  | H  | 4.68352154  | -2.91241642  | 0.97554406   |
| H | 4.99963428  | 1.34322909   | -5.63112597  | H  | 4.46461984  | -4.10839262  | 2.24871161   |
| H | 5.74096177  | 1.45188772   | -4.03684447  | C  | 5.23108394  | -4.91365663  | 0.45263040   |
| C | 6.32858560  | -0.26724845  | -5.16288557  | N  | 5.22696846  | -4.75290348  | -0.92260080  |
| O | 5.68443476  | -1.07616214  | -4.50963253  | H  | 5.17023001  | -3.89611400  | -1.46782403  |
| O | 7.30941560  | -0.62004280  | -5.98558322  | C  | 5.24731422  | -5.98128957  | -1.49626531  |
| H | 7.43795502  | -1.60953324  | -5.95649557  | H  | 5.21608249  | -6.14417780  | -2.55974564  |
| C | 5.28574423  | -8.68544124  | -9.76462152  | N  | 5.26928876  | -6.91776134  | -0.56706379  |
| H | 5.97825825  | -8.89069402  | -10.57970825 | C  | 5.25450240  | -6.27052730  | 0.64746282   |
| H | 4.81316120  | -9.62551875  | -9.47890352  | H  | 5.24652014  | -6.82412033  | 1.57632723   |
| C | 6.08459642  | -8.05582408  | -8.61641283  | C  | 6.04520695  | -10.16088100 | 2.57094569   |
| O | 6.83853437  | -7.09148053  | -8.80304031  | H  | 6.93903369  | -9.82203688  | 2.03214073   |
| N | 5.91119031  | -8.61783854  | -7.40778067  | H  | 5.49579740  | -9.24363209  | 2.84471141   |
| H | 6.32642728  | -8.15719575  | -6.60320481  | C  | 5.16011740  | -11.01910705 | 1.71452426   |
| H | 5.19035768  | -9.32271346  | -7.25840306  | N  | 4.68269112  | -10.61714835 | 0.46705130   |
| C | 3.34586934  | -4.81277338  | -6.37720808  | C  | 3.80099289  | -11.59058134 | 0.08993728   |
| H | 3.28866097  | -3.82716087  | -6.84618660  | H  | 3.25128154  | -11.53371091 | -0.84153460  |
| H | 2.77555921  | -4.76361639  | -5.44249711  | N  | 3.66917900  | -12.55610811 | 0.97796484   |
| C | 4.77352772  | -5.09768263  | -6.04990507  | H  | 5.88699133  | -9.49279844  | -3.14862126  |
| C | 5.13186790  | -6.26788064  | -5.15526384  | C  | 4.51913031  | -12.21031900 | 1.99432650   |
| O | 4.20688567  | -6.96621723  | -4.66381698  | H  | 4.59419098  | -12.82028125 | 2.88957286   |
| C | 6.49957619  | -6.53588283  | -4.92350376  | Cu | 4.95790631  | -8.99066296  | -0.57834205  |
| H | 6.75147111  | -7.40933580  | -4.32947460  | O  | 7.44886008  | -10.18270244 | -3.82327700  |
| C | 7.52637592  | -5.71555348  | -5.41651013  | H  | 7.91047354  | -10.93801507 | -3.39424674  |
| O | 8.75549669  | -5.96922300  | -5.38506243  | H  | 8.13259257  | -9.47955616  | -3.88488869  |
| C | 7.10027749  | -4.34999588  | -5.96883245  | O  | 2.98467081  | -8.50016326  | -0.56124177  |
| O | 7.88063080  | -3.39760732  | -5.97076837  | H  | 2.53803296  | -8.28282581  | -1.41242837  |
| C | 5.72493910  | -4.22071367  | -6.42719697  | H  | 2.38096032  | -9.06709784  | 0.01046395   |
| H | 5.48801609  | -3.32780047  | -6.99600390  | O  | 5.00615178  | -9.17181861  | -2.85096200  |
| C | -0.77903459 | -1.39102741  | -3.46134478  | H  | 4.73086666  | -8.46084768  | -3.46439240  |
| H | -1.05168150 | -1.12714669  | -2.42971289  | O  | 1.99587826  | -7.27028267  | -2.91265696  |
| H | -0.76615911 | -0.45624318  | -4.03138462  | H  | 2.76069423  | -7.03184465  | -3.46929279  |
| C | 0.59677949  | -2.01134418  | -3.48423741  | H  | 1.32225438  | -7.53159543  | -3.57290230  |
| C | 1.03778065  | -2.88159678  | -2.47971080  | C  | 14.38315446 | -7.43536821  | -0.51167736  |
| H | 0.35283123  | -3.17071977  | -1.68561827  | C  | 6.98961919  | 2.22925644   | -5.63961040  |
| C | 2.34479950  | -3.36296019  | -2.45587946  | C  | 4.20274224  | -7.71427096  | -10.28944195 |
| H | 2.68072913  | -4.03641282  | -1.67408376  | C  | 2.64922252  | -5.83444829  | -7.30150423  |
| C | 3.24456929  | -2.94873400  | -3.44257778  | C  | -1.88847086 | -2.28931604  | -4.03516195  |
| O | 4.54769670  | -3.36476181  | -3.36070641  | C  | 10.94289945 | -8.75348079  | 1.53341153   |
| H | 5.10314899  | -2.73493003  | -3.86845043  | C  | 6.49212264  | -3.40216974  | 2.06501081   |
| C | 2.80589181  | -2.13497223  | -4.49162623  | C  | 6.49568722  | -10.83153403 | 3.86831489   |

7^2-, -2H+

|   |             |              |              |    |             |              |              |
|---|-------------|--------------|--------------|----|-------------|--------------|--------------|
| C | 14.54901309 | -7.88221151  | -1.97127296  | H  | 3.52099854  | -1.55443743  | -5.33994791  |
| H | 14.99876775 | -8.87702818  | -1.98410341  | C  | 1.50712113  | -1.55602383  | -4.56539985  |
| H | 15.25052891 | -7.20407245  | -2.46007251  | H  | 1.15509605  | -0.82329209  | -5.28811039  |
| C | 13.21696484 | -7.96742156  | -2.67544101  | C  | 10.49138521 | -8.44109381  | 0.08505173   |
| C | 12.55594971 | -6.86410346  | -3.23229830  | H  | 11.26116723 | -8.81928171  | -0.58842086  |
| H | 13.03302436 | -5.88711345  | -3.24236749  | H  | 10.46606883 | -7.35787881  | -0.06400375  |
| C | 11.25978852 | -6.98909883  | -3.72746279  | C  | 9.15971303  | -9.02184550  | -0.27352736  |
| H | 10.74154115 | -6.12481685  | -4.12900652  | N  | 8.98614802  | -10.32079993 | -0.72706979  |
| C | 10.60234048 | -8.22725455  | -3.67392739  | H  | 9.71528039  | -11.01196349 | -0.88547012  |
| O | 9.31752858  | -8.38299848  | -4.06816052  | C  | 7.67366915  | -10.51300781 | -0.98673456  |
| H | 9.03506106  | -7.61358517  | -4.62043047  | H  | 7.26661951  | -11.42606281 | -1.38826958  |
| C | 11.26877952 | -9.34945272  | -3.17343088  | N  | 6.98955418  | -9.41610027  | -0.71360035  |
| H | 10.74003684 | -10.29637376 | -3.14660331  | C  | 7.90195741  | -8.47555972  | -0.27539204  |
| C | 12.55586713 | -9.20160267  | -2.67129469  | H  | 7.59244461  | -7.48203114  | 0.00377938   |
| H | 13.05384004 | -10.03602879 | -2.18673068  | C  | 5.13093019  | -3.75976075  | 1.42659764   |
| C | 5.91255218  | 1.25040677   | -5.07215102  | H  | 4.74504649  | -2.88034649  | 0.89762332   |
| H | 4.96759130  | 1.40115701   | -5.60560350  | H  | 4.42574147  | -3.97857490  | 2.23395512   |
| H | 5.73015692  | 1.49303735   | -4.02162080  | C  | 5.18372348  | -4.94200328  | 0.51940079   |
| C | 6.28322719  | -0.28824935  | -5.17817868  | N  | 5.15107787  | -4.88939664  | -0.86499019  |
| O | 5.52057662  | -0.97626456  | -4.40487033  | H  | 5.11835309  | -4.06678225  | -1.46810366  |
| O | 7.14598993  | -0.71315395  | -5.95373392  | C  | 5.11973869  | -6.16754173  | -1.32578346  |
| H | 6.60946827  | -5.43720835  | -3.81372033  | H  | 5.05727858  | -6.44555814  | -2.36485362  |
| C | 5.28873436  | -8.67131781  | -9.74056803  | N  | 5.13553114  | -7.02983438  | -0.32431345  |
| H | 6.00298993  | -8.86246078  | -10.54114853 | C  | 5.16834044  | -6.28099637  | 0.82571070   |
| H | 4.82174783  | -9.61933024  | -9.47498552  | H  | 5.17383449  | -6.74462703  | 1.80345525   |
| C | 6.07943875  | -8.05855413  | -8.56362304  | C  | 5.98848872  | -10.24061808 | 2.56751113   |
| O | 6.82802375  | -7.08337304  | -8.72828140  | H  | 6.84790617  | -9.89811169  | 1.98139264   |
| N | 5.91074678  | -8.66673543  | -7.37876073  | H  | 5.39579325  | -9.34728335  | 2.80855116   |
| H | 6.46324741  | -8.46612505  | -6.54655619  | C  | 5.12797720  | -11.16388623 | 1.74650458   |
| H | 5.23636572  | -9.42392233  | -7.28151439  | N  | 4.63053046  | -10.75853253 | 0.51570183   |
| C | 3.39590533  | -4.73601795  | -6.47521294  | C  | 3.86186093  | -11.74222693 | 0.06284884   |
| H | 3.34171368  | -3.78722639  | -7.01572738  | H  | 3.30179569  | -11.71184090 | -0.85955605  |
| H | 2.85586701  | -4.60401459  | -5.53393268  | N  | 3.83646367  | -12.76721812 | 0.93567487   |
| C | 4.83605755  | -5.03000410  | -6.18758572  | H  | 3.36005365  | -13.66709166 | 0.79079780   |
| C | 5.11141096  | -6.02023446  | -5.12612960  | C  | 4.63057200  | -12.41925674 | 2.00963845   |
| O | 4.20496443  | -6.62743443  | -4.56681665  | H  | 4.73329745  | -13.06210312 | 2.87186739   |
| C | 6.53563053  | -6.16917148  | -4.63320039  | Cu | 4.95776260  | -9.20624048  | -0.87914737  |
| H | 6.68341788  | -7.17086236  | -4.22297356  | O  | 6.77641693  | -9.33736979  | -4.62307160  |
| C | 7.59424472  | -5.81098471  | -5.63848777  | H  | 7.62784888  | -9.29989855  | -4.15339748  |
| O | 8.69073979  | -6.34902899  | -5.67428160  | H  | 6.07740792  | -9.22385244  | -3.89451029  |
| C | 7.26734410  | -4.69833041  | -6.63978167  | O  | 2.95794476  | -8.98444302  | -0.89432051  |
| O | 8.14607944  | -4.22178820  | -7.33134626  | H  | 2.48868808  | -8.44047920  | -1.56766558  |
| C | 5.85189426  | -4.33089136  | -6.75545527  | H  | 2.35371792  | -9.23311367  | -0.14010052  |
| H | 5.66624990  | -3.48587272  | -7.40378693  | O  | 5.02695110  | -8.98274746  | -2.78460904  |
| C | -0.75653502 | -1.41370145  | -3.46490440  | H  | 4.23767926  | -8.55076232  | -3.14100353  |
| H | -0.99206322 | -1.19933028  | -2.41236559  | O  | 1.97881514  | -7.31928737  | -2.91506525  |
| H | -0.76990033 | -0.45130557  | -3.98779206  | H  | 2.68195635  | -6.82436488  | -3.37064690  |
| C | 0.62745739  | -2.01871660  | -3.57745535  | H  | 1.33784969  | -7.51970416  | -3.63008177  |
| C | 1.10866515  | -2.98141969  | -2.68399830  | C  | 14.38652205 | -7.43246723  | -0.51145311  |
| H | 0.44723543  | -3.37099703  | -1.91277156  | C  | 6.98098959  | 2.23179601   | -5.63872288  |
| C | 2.43215169  | -3.42507405  | -2.72986174  | C  | 4.20421615  | -7.71289665  | -10.28879190 |
| H | 2.78844418  | -4.15902368  | -2.01167270  | C  | 2.65822250  | -5.82087879  | -7.30737324  |
| C | 3.32617345  | -2.88017188  | -3.66483759  | C  | -1.88646935 | -2.28623654  | -4.03858399  |
| O | 4.63906577  | -3.22234652  | -3.63819259  | C  | 10.94142159 | -8.74987912  | 1.53550808   |
| H | 5.17264270  | -2.40633027  | -4.03971926  | C  | 6.49559675  | -3.39564835  | 2.06027280   |
| C | 2.82715770  | -1.98003226  | -4.62606836  | C  | 6.49056760  | -10.84380673 | 3.87539011   |

8^2-, -2H+

|   |             |              |              |    |             |              |              |
|---|-------------|--------------|--------------|----|-------------|--------------|--------------|
| C | 14.56530853 | -7.87279713  | -1.96736280  | H  | 3.50831451  | -1.55027107  | -5.34859136  |
| H | 15.03210267 | -8.85836375  | -1.98009631  | C  | 1.49739944  | -1.54942824  | -4.56252158  |
| H | 15.25377274 | -7.17907031  | -2.45064414  | H  | 1.14244938  | -0.81302632  | -5.28113319  |
| C | 13.23846117 | -7.99110768  | -2.67072288  | C  | 10.48814332 | -8.44449215  | 0.08060765   |
| C | 12.53137519 | -6.90797398  | -3.20245485  | H  | 11.25657990 | -8.82730809  | -0.59229088  |
| H | 12.97124458 | -5.91442710  | -3.20644149  | H  | 10.46543334 | -7.36132031  | -0.06918647  |
| C | 11.23011162 | -7.07553279  | -3.67365742  | C  | 9.15353451  | -9.02008250  | -0.27883923  |
| H | 10.66869958 | -6.22201522  | -4.03801074  | N  | 8.97875022  | -10.31278459 | -0.74890037  |
| C | 10.61971388 | -8.33710629  | -3.62028298  | H  | 9.70572927  | -11.00512003 | -0.90884628  |
| O | 9.33157654  | -8.54702917  | -3.97719234  | C  | 7.66585844  | -10.49995722 | -1.01209911  |
| H | 9.01609397  | -7.80788200  | -4.53455928  | H  | 7.25777817  | -11.40825180 | -1.42581487  |
| C | 11.33851190 | -9.44043098  | -3.15084790  | N  | 6.98419164  | -9.40394656  | -0.73038529  |
| H | 10.84951807 | -10.40792121 | -3.12924107  | C  | 7.89639440  | -8.47135838  | -0.27860729  |
| C | 12.62528593 | -9.24845709  | -2.67007480  | H  | 7.58663833  | -7.47904122  | 0.00631505   |
| H | 13.16756412 | -10.06242319 | -2.20186572  | C  | 5.11948312  | -3.75588370  | 1.44333383   |
| C | 5.91369278  | 1.25339143   | -5.06622008  | H  | 4.72629336  | -2.87344549  | 0.92405335   |
| H | 4.96691538  | 1.40713329   | -5.59690615  | H  | 4.42315472  | -3.98547404  | 2.25522824   |
| H | 5.73279102  | 1.49106760   | -4.01379838  | C  | 5.17213825  | -4.92936996  | 0.53051688   |
| C | 6.28497197  | -0.28346223  | -5.18196466  | N  | 5.20089476  | -4.87103440  | -0.85280957  |
| O | 5.51052223  | -0.97812518  | -4.43075984  | H  | 5.19324670  | -4.04930380  | -1.45743593  |
| O | 7.16368023  | -0.69738889  | -5.94610092  | C  | 5.18243199  | -6.14520911  | -1.31915516  |
| H | 9.11673579  | -5.93733474  | -6.28152632  | H  | 5.16667508  | -6.40835318  | -2.36186194  |
| C | 5.28585748  | -8.68034312  | -9.74565870  | N  | 5.14453039  | -7.01239393  | -0.32129104  |
| H | 5.99216976  | -8.87627347  | -10.55205964 | C  | 5.13156624  | -6.26847728  | 0.83178128   |
| H | 4.81291329  | -9.62562426  | -9.47761508  | H  | 5.09162738  | -6.73376229  | 1.80789084   |
| C | 6.09163745  | -8.07788310  | -8.57434744  | C  | 5.98886893  | -10.23460968 | 2.56842730   |
| O | 6.85064129  | -7.11037990  | -8.74189963  | H  | 6.84886090  | -9.89075725  | 1.98381154   |
| N | 5.93432311  | -8.69357973  | -7.39227521  | H  | 5.39633028  | -9.34309473  | 2.81371231   |
| H | 6.46453909  | -8.44468460  | -6.56168473  | C  | 5.13164790  | -11.15414960 | 1.74104919   |
| H | 5.25138745  | -9.44085844  | -7.28631632  | N  | 4.63294556  | -10.74085188 | 0.51253664   |
| C | 3.38551371  | -4.72868444  | -6.47029802  | C  | 3.86765960  | -11.72353682 | 0.05211242   |
| H | 3.35457422  | -3.78672278  | -7.02406457  | H  | 3.30624467  | -11.68668930 | -0.86903121  |
| H | 2.82594836  | -4.58256218  | -5.54273835  | N  | 3.84624773  | -12.75642266 | 0.91602242   |
| C | 4.81029343  | -5.04181196  | -6.15867319  | H  | 3.36928014  | -13.65573763 | 0.76831294   |
| C | 5.05589413  | -6.04197352  | -5.06855294  | C  | 4.63823258  | -12.41360419 | 1.99376684   |
| O | 4.09942933  | -6.49546974  | -4.43339122  | H  | 4.74156711  | -13.06435326 | 2.85005813   |
| C | 6.42129419  | -6.47774975  | -4.78616121  | Cu | 4.94406026  | -9.17914712  | -0.87839842  |
| H | 6.55449822  | -7.27490201  | -4.06771770  | O  | 6.80639804  | -9.52016101  | -4.48285014  |
| C | 7.40741423  | -5.99970476  | -5.56385227  | H  | 7.61377050  | -9.51735686  | -3.94464485  |
| O | 8.68517214  | -6.42905187  | -5.53917379  | H  | 6.06671976  | -9.31413829  | -3.82566953  |
| C | 7.19888603  | -4.92253292  | -6.58241003  | O  | 2.94706922  | -8.96827976  | -0.88734350  |
| O | 8.18632519  | -4.58164500  | -7.23497208  | H  | 2.46864798  | -8.43584770  | -1.56655913  |
| C | 5.84846863  | -4.42383144  | -6.76390381  | H  | 2.34402430  | -9.22399845  | -0.13348521  |
| H | 5.73296804  | -3.58791855  | -7.43745020  | O  | 5.01398543  | -8.90528952  | -2.77412293  |
| C | -0.76232557 | -1.41311470  | -3.45919649  | H  | 4.24796711  | -8.42681852  | -3.12891249  |
| H | -1.00104876 | -1.20103211  | -2.40726761  | O  | 1.90435789  | -7.30153226  | -2.85246855  |
| H | -0.77750830 | -0.45046123  | -3.98127173  | H  | 2.59849826  | -6.75363974  | -3.25871799  |
| C | 0.62115670  | -2.01447683  | -3.57267226  | H  | 1.31032528  | -7.51471876  | -3.60288885  |
| C | 1.10426196  | -2.97957876  | -2.68256869  | C  | 14.38695714 | -7.43277474  | -0.50985544  |
| H | 0.44634993  | -3.37186936  | -1.90909395  | C  | 6.98261020  | 2.23364917   | -5.63142286  |
| C | 2.42780196  | -3.42151496  | -2.73275410  | C  | 4.20371415  | -7.71276839  | -10.28590531 |
| H | 2.79268533  | -4.15413940  | -2.01870377  | C  | 2.65744508  | -5.81671325  | -7.30500829  |
| C | 3.31887594  | -2.87463797  | -3.67093902  | C  | -1.88898714 | -2.28830255  | -4.03625980  |
| O | 4.62697784  | -3.21962718  | -3.64566038  | C  | 10.93798874 | -8.75212084  | 1.53301937   |
| H | 5.16358993  | -2.41763273  | -4.05691376  | C  | 6.48977117  | -3.39630265  | 2.06575882   |
| C | 2.81673990  | -1.97395188  | -4.63111429  | C  | 6.49113908  | -10.84359094 | 3.87486933   |

0\*3-, -3H+

|   |             |              |              |    |             |              |              |
|---|-------------|--------------|--------------|----|-------------|--------------|--------------|
| C | 14.55856563 | -7.91829706  | -1.96276383  | H  | 3.49556902  | -2.14737734  | -5.15835730  |
| H | 15.00315046 | -8.91703776  | -1.94458980  | C  | 1.49046136  | -1.83275356  | -4.43425051  |
| H | 15.27705474 | -7.25426566  | -2.44677233  | H  | 1.17634343  | -1.29015078  | -5.32540079  |
| C | 13.24468407 | -8.00987456  | -2.69625342  | C  | 10.44079587 | -8.43822926  | 0.08529185   |
| C | 12.64584207 | -6.91613257  | -3.33131709  | H  | 11.17614024 | -8.86607834  | -0.59386674  |
| H | 13.16797294 | -5.96272541  | -3.38211476  | H  | 10.46942327 | -7.35293128  | -0.06751816  |
| C | 11.35310600 | -7.00773636  | -3.83943983  | C  | 9.07813368  | -8.97151732  | -0.22742968  |
| H | 10.87801637 | -6.15015269  | -4.30030695  | N  | 8.86335024  | -10.29235186 | -0.56982253  |
| C | 10.62610715 | -8.20340797  | -3.70110867  | C  | 7.54436994  | -10.38166388 | -0.70559583  |
| O | 9.35105653  | -8.31339352  | -4.12398156  | H  | 7.01463546  | -11.28703720 | -0.97181406  |
| H | 9.10117667  | -7.49704401  | -4.68517696  | N  | 6.89113625  | -9.21232292  | -0.48938774  |
| C | 11.22287068 | -9.31499899  | -3.09465123  | C  | 7.87406176  | -8.29990873  | -0.18576238  |
| H | 10.62273711 | -10.19877463 | -2.90610965  | H  | 7.64072923  | -7.26771927  | 0.02725065   |
| C | 12.51449485 | -9.20191065  | -2.59994623  | C  | 5.11776722  | -3.74518263  | 1.40260979   |
| H | 12.94199263 | -10.02284373 | -2.03014436  | H  | 4.73501626  | -2.85528106  | 0.88718821   |
| C | 5.91339653  | 1.25507295   | -5.03350689  | H  | 4.41312025  | -3.97208698  | 2.21170642   |
| H | 4.95946700  | 1.37491078   | -5.55841598  | C  | 5.15274532  | -4.89753965  | 0.44251613   |
| H | 5.74122714  | 1.51911814   | -3.98399867  | N  | 5.03725588  | -4.75780442  | -0.92891379  |
| C | 6.32410817  | -0.22891171  | -5.11611525  | H  | 4.76142209  | -8.52260017  | -3.40566836  |
| O | 5.51564021  | -0.91258842  | -4.29400755  | C  | 5.00197822  | -6.01398262  | -1.39878854  |
| O | 7.17958273  | -0.72616429  | -5.81386492  | H  | 4.91114047  | -6.25909761  | -2.44551578  |
| H | 5.71118133  | -1.87348092  | -4.25965339  | N  | 5.07286632  | -6.94719799  | -0.43797281  |
| C | 5.28762608  | -8.69694895  | -9.77128328  | C  | 5.16788132  | -6.24675186  | 0.73813998   |
| H | 5.98135125  | -8.89264655  | -10.58766524 | H  | 5.25339437  | -6.75258856  | 1.69221316   |
| H | 4.81268659  | -9.63953316  | -9.49650755  | C  | 6.01582255  | -10.24427895 | 2.54632448   |
| C | 6.08931369  | -8.08097284  | -8.61693035  | H  | 6.88688796  | -9.92686554  | 1.96453421   |
| O | 6.82987682  | -7.10765195  | -8.80849803  | H  | 5.43528265  | -9.33778350  | 2.76724386   |
| N | 5.93660444  | -8.66307827  | -7.41860159  | C  | 5.14754534  | -11.15683893 | 1.71646919   |
| H | 6.33952224  | -8.20231933  | -6.60269326  | N  | 4.63310732  | -10.73060610 | 0.49717979   |
| H | 5.21215680  | -9.36392050  | -7.27244586  | C  | 3.87853003  | -11.70808722 | 0.02351024   |
| C | 3.39443684  | -4.89841493  | -6.33383649  | H  | 3.31726321  | -11.65381860 | -0.89667136  |
| H | 3.35178001  | -3.89395114  | -6.76413883  | N  | 3.86963892  | -12.75885344 | 0.87161561   |
| H | 2.85252790  | -4.87631567  | -5.38272801  | H  | 3.40176017  | -13.65902162 | 0.71966394   |
| C | 4.83832443  | -5.24493230  | -6.09560018  | C  | 4.66699775  | -12.42392240 | 1.95129491   |
| C | 5.19096955  | -6.37016229  | -5.15191622  | H  | 4.78763616  | -13.09077626 | 2.79265186   |
| O | 4.25716058  | -6.98640720  | -4.56542195  | Cu | 4.97409977  | -8.94733406  | -0.62875062  |
| C | 6.55794028  | -6.69523160  | -4.96944401  | O  | 7.38890954  | -10.22145325 | -3.80915877  |
| H | 6.79646526  | -7.45665276  | -4.23293623  | H  | 7.82287198  | -10.96021677 | -3.31635788  |
| C | 7.60025981  | -6.03133338  | -5.64203749  | H  | 8.07147610  | -9.51469467  | -3.77722839  |
| O | 8.82636393  | -6.30469845  | -5.55773219  | O  | 2.96640679  | -8.93089483  | -0.88064153  |
| C | 7.23258232  | -4.88132515  | -6.58857950  | H  | 2.53329283  | -8.31022513  | -1.51448880  |
| O | 8.08648264  | -4.31141336  | -7.25163443  | H  | 2.35585339  | -9.16588919  | -0.13133549  |
| C | 5.81272715  | -4.52327373  | -6.68431067  | O  | 4.98175400  | -9.31340092  | -2.86923402  |
| H | 5.59809592  | -3.67060032  | -7.31775565  | H  | 5.89988526  | -9.57911543  | -3.12501059  |
| C | -0.78887306 | -1.37548849  | -3.45549611  | O  | 1.98811720  | -7.17849993  | -2.87095747  |
| H | -1.10448535 | -1.05554203  | -2.45137488  | H  | 2.79242430  | -6.91188761  | -3.35961957  |
| H | -0.74242927 | -0.46865022  | -4.06889769  | H  | 1.38798056  | -7.47711161  | -3.58200182  |
| C | 0.57998293  | -2.00843882  | -3.38427439  | C  | 14.36520848 | -7.43992243  | -0.51587982  |
| C | 1.01881994  | -2.71629859  | -2.25810635  | C  | 6.97161450  | 2.21533402   | -5.63575241  |
| H | 0.33012685  | -2.87054140  | -1.42699399  | C  | 4.20751218  | -7.71822641  | -10.28768381 |
| C | 2.31692482  | -3.21501870  | -2.16029377  | C  | 2.64983078  | -5.86016834  | -7.29213358  |
| H | 2.64704582  | -3.76258256  | -1.28355476  | C  | -1.89066186 | -2.28202509  | -4.03332738  |
| C | 3.23111271  | -2.99568932  | -3.20712615  | C  | 10.91224346 | -8.76076488  | 1.52403262   |
| O | 4.51522060  | -3.39928852  | -3.16347677  | C  | 6.48437816  | -3.38969389  | 2.04489060   |
| H | 4.75642104  | -3.78305899  | -2.23728382  | C  | 6.49069659  | -10.84193047 | 3.86997764   |
| C | 2.78936870  | -2.31711414  | -4.35593963  |    |             |              |              |

1^3-, -3H+

|   |             |              |              |    |             |              |              |
|---|-------------|--------------|--------------|----|-------------|--------------|--------------|
| C | 14.54822083 | -7.91469640  | -1.96793496  | H  | 3.56866086  | -2.12271815  | -5.02911122  |
| H | 14.97037110 | -8.92378934  | -1.95490277  | C  | 1.53345917  | -1.80164135  | -4.37170402  |
| H | 15.28501027 | -7.26570501  | -2.44494908  | H  | 1.28017497  | -1.16544363  | -5.21868614  |
| C | 13.23575723 | -7.96304191  | -2.71363576  | C  | 10.44540665 | -8.44294524  | 0.07911186   |
| C | 12.66081314 | -6.84013748  | -3.32120476  | H  | 11.18108189 | -8.87766649  | -0.59689873  |
| H | 13.19547912 | -5.89258085  | -3.33160830  | H  | 10.47886263 | -7.35829846  | -0.07746750  |
| C | 11.37774093 | -6.89650525  | -3.85951611  | C  | 9.08237620  | -8.97419872  | -0.23750574  |
| H | 10.91832442 | -6.01284676  | -4.28528163  | N  | 8.87192701  | -10.29237436 | -0.59273271  |
| C | 10.63512427 | -8.08709890  | -3.78538557  | C  | 7.55211988  | -10.38467709 | -0.72610117  |
| O | 9.37199510  | -8.17389335  | -4.25415209  | H  | 7.02371167  | -11.29002290 | -0.99671233  |
| H | 9.10064505  | -7.30572665  | -4.70591141  | N  | 6.89683548  | -9.21867714  | -0.50185831  |
| C | 11.20289143 | -9.22442068  | -3.19832959  | C  | 7.87631242  | -8.30571929  | -0.19016510  |
| H | 10.59230126 | -10.11088835 | -3.06286160  | H  | 7.63943219  | -7.27676320  | 0.03470547   |
| C | 12.48472566 | -9.14574439  | -2.67028656  | C  | 5.10974732  | -3.77349693  | 1.43717242   |
| H | 12.88783414 | -9.99221739  | -2.12093620  | H  | 4.70886735  | -2.89783258  | 0.91233798   |
| C | 5.93888483  | 1.21161250   | -5.07804438  | H  | 4.42096183  | -4.00001827  | 2.26085081   |
| H | 4.97787813  | 1.36029611   | -5.57880320  | C  | 5.14644305  | -4.93816311  | 0.49540415   |
| H | 5.79155329  | 1.40471146   | -4.01256207  | N  | 5.05536302  | -4.79443226  | -0.87214855  |
| C | 6.29521114  | -0.28682123  | -5.22802627  | H  | 4.74348637  | -8.53613856  | -3.42579826  |
| O | 5.59262379  | -1.11344918  | -4.68809960  | C  | 5.02862140  | -6.04592278  | -1.34907895  |
| O | 7.34705453  | -0.61231012  | -5.99803530  | H  | 4.95978704  | -6.28449889  | -2.39986971  |
| H | 7.43388882  | -1.60363616  | -6.00365052  | N  | 5.07948834  | -6.98296127  | -0.39132558  |
| C | 5.29177180  | -8.68724207  | -9.76071020  | C  | 5.15256227  | -6.28897226  | 0.79100507   |
| H | 5.98983955  | -8.88401307  | -10.57390902 | H  | 5.22072670  | -6.80236157  | 1.74218083   |
| H | 4.82189578  | -9.62968809  | -9.47906808  | C  | 6.01577201  | -10.24668963 | 2.54504936   |
| C | 6.08813356  | -8.05429145  | -8.60987323  | H  | 6.88813472  | -9.92765773  | 1.96567232   |
| O | 6.83571019  | -7.08783112  | -8.81081583  | H  | 5.43509722  | -9.34062941  | 2.76449245   |
| N | 5.91413848  | -8.60304249  | -7.39799971  | C  | 5.15214616  | -11.16083566 | 1.71154308   |
| H | 6.31464959  | -8.12192494  | -6.59326992  | N  | 4.63830791  | -10.73541205 | 0.49195688   |
| H | 5.19003540  | -9.30270215  | -7.24115144  | C  | 3.88140678  | -11.71016616 | 0.01846370   |
| C | 3.31420649  | -4.86351559  | -6.31791663  | H  | 3.31238308  | -11.64911807 | -0.89653566  |
| H | 3.24144798  | -3.85932327  | -6.74419634  | N  | 3.87348617  | -12.76192469 | 0.86505255   |
| H | 2.73821560  | -4.85897711  | -5.38534749  | H  | 3.40284682  | -13.66122195 | 0.71491383   |
| C | 4.74738857  | -5.12924458  | -5.99461186  | C  | 4.67226405  | -12.42831474 | 1.94397115   |
| C | 5.12430699  | -6.30506839  | -5.12075712  | H  | 4.79240973  | -13.09594570 | 2.78452819   |
| O | 4.20616393  | -7.02125103  | -4.63640620  | Cu | 4.97544791  | -8.95782695  | -0.62771552  |
| C | 6.49923769  | -6.56775390  | -4.92039396  | O  | 7.44289798  | -10.14699289 | -3.84409497  |
| H | 6.76949783  | -7.42622885  | -4.31261936  | H  | 7.86550735  | -10.86257203 | -3.31257219  |
| C | 7.51186949  | -5.72709658  | -5.41239691  | H  | 8.11116457  | -9.42839511  | -3.83533695  |
| O | 8.74571036  | -5.96802823  | -5.39459288  | O  | 2.96419601  | -8.93769630  | -0.89645991  |
| C | 7.07660197  | -4.37103808  | -5.98870891  | H  | 2.53540710  | -8.29856019  | -1.51578795  |
| O | 7.87763976  | -3.44286253  | -6.10003868  | H  | 2.35615953  | -9.15797998  | -0.14038468  |
| C | 5.67948045  | -4.23256509  | -6.36881397  | O  | 4.99656611  | -9.31542271  | -2.88794049  |
| H | 5.41816220  | -3.33137116  | -6.91160973  | H  | 5.92433301  | -9.53968073  | -3.14508151  |
| C | -0.78457476 | -1.37720449  | -3.46063658  | O  | 1.98877752  | -7.15548758  | -2.87129662  |
| H | -1.10499140 | -1.03740750  | -2.46397150  | H  | 2.79056885  | -6.89251174  | -3.36464649  |
| H | -0.72329396 | -0.48272096  | -4.09062895  | H  | 1.37896540  | -7.44386334  | -3.57832192  |
| C | 0.57700839  | -2.03136623  | -3.37436587  | C  | 14.36352409 | -7.43984901  | -0.51802542  |
| C | 0.94382890  | -2.84567696  | -2.29441115  | C  | 6.97839104  | 2.21455940   | -5.64123294  |
| H | 0.21013878  | -3.04660314  | -1.51334607  | C  | 4.20746006  | -7.71861571  | -10.28740909 |
| C | 2.21619424  | -3.40686129  | -2.19420597  | C  | 2.64216053  | -5.85906778  | -7.29403325  |
| H | 2.48989955  | -4.04797975  | -1.36031371  | C  | -1.89241883 | -2.28214148  | -4.03237263  |
| C | 3.17821442  | -3.14125791  | -3.18992149  | C  | 10.91107400 | -8.76077872  | 1.52202560   |
| O | 4.42393698  | -3.62657693  | -3.15477394  | C  | 6.48388316  | -3.39206540  | 2.04890071   |
| H | 4.68833778  | -3.90173452  | -2.20891940  | C  | 6.48941272  | -10.84362903 | 3.86996318   |
| C | 2.80845245  | -2.34337033  | -4.28970881  |    |             |              |              |

3^2-, -3H+

|   |             |              |              |    |             |              |              |
|---|-------------|--------------|--------------|----|-------------|--------------|--------------|
| C | 14.55484509 | -7.90723391  | -1.96312854  | H  | 3.49189983  | -2.12363439  | -5.21109533  |
| H | 15.00090735 | -8.90519579  | -1.95255145  | C  | 1.49196562  | -1.81511198  | -4.46911710  |
| H | 15.27261399 | -7.24143219  | -2.44540539  | H  | 1.17042726  | -1.27312332  | -5.35757673  |
| C | 13.23752046 | -7.99046420  | -2.69109592  | C  | 10.50801611 | -8.43189073  | 0.06656520   |
| C | 12.59873763 | -6.87944928  | -3.25775262  | H  | 11.27610548 | -8.83268536  | -0.59736245  |
| H | 13.09263357 | -5.91021340  | -3.26143250  | H  | 10.51738585 | -7.34734643  | -0.07956975  |
| C | 11.30605855 | -6.97973135  | -3.75994666  | C  | 9.15921621  | -8.95079374  | -0.28367184  |
| H | 10.80298596 | -6.11212926  | -4.16938517  | N  | 8.86686634  | -10.28716313 | -0.53640201  |
| C | 10.61638504 | -8.20698139  | -3.70422924  | C  | 7.52487952  | -10.40368423 | -0.68673038  |
| O | 9.34608736  | -8.32664508  | -4.12234586  | H  | 6.99419541  | -11.32542913 | -0.85507866  |
| H | 9.08676693  | -7.49825806  | -4.70386715  | N  | 6.95635936  | -9.21963998  | -0.56470408  |
| C | 11.26545726 | -9.33619574  | -3.18634354  | C  | 7.95472296  | -8.30605244  | -0.32185402  |
| H | 10.72245821 | -10.27515296 | -3.14145719  | H  | 7.73148446  | -7.26201781  | -0.17171804  |
| C | 12.55352430 | -9.21066382  | -2.67925601  | C  | 5.12083969  | -3.76716606  | 1.39830045   |
| H | 13.02761569 | -10.04841992 | -2.17602063  | H  | 4.70386542  | -2.86920509  | 0.92610127   |
| C | 5.91211842  | 1.26266655   | -5.03176515  | H  | 4.43390231  | -4.05848885  | 2.20127714   |
| H | 4.96369051  | 1.38169027   | -5.56520841  | C  | 5.19940374  | -4.87437295  | 0.38770016   |
| H | 5.73444093  | 1.53418389   | -3.98746817  | N  | 5.07761922  | -4.69444245  | -0.97826965  |
| C | 6.32007619  | -0.21995768  | -5.10303326  | H  | 9.53809865  | -11.04431962 | -0.60859267  |
| O | 5.52716225  | -0.88880170  | -4.25738537  | C  | 5.11335145  | -5.93484988  | -1.49053509  |
| O | 7.16015723  | -0.72703027  | -5.81286831  | H  | 5.00673770  | -6.14829807  | -2.54148369  |
| H | 5.69441520  | -1.85531944  | -4.22434407  | N  | 5.25212199  | -6.89281249  | -0.56442159  |
| C | 5.29964975  | -8.68974593  | -9.77203358  | C  | 5.29755921  | -6.22734222  | 0.63592579   |
| H | 5.99747129  | -8.87916139  | -10.58645916 | H  | 5.36827247  | -6.76148694  | 1.57530244   |
| H | 4.82550503  | -9.63508126  | -9.50435808  | C  | 6.07357989  | -10.15288967 | 2.56032551   |
| C | 6.09499549  | -8.08105602  | -8.61198557  | H  | 6.97609931  | -9.79966807  | 2.04169299   |
| O | 6.83142294  | -7.10171317  | -8.78735818  | H  | 5.50242038  | -9.24548473  | 2.81880747   |
| N | 5.94085356  | -8.67670481  | -7.41927496  | C  | 5.22478730  | -11.01528127 | 1.67029744   |
| H | 6.33480534  | -8.21801067  | -6.59824944  | N  | 4.69792104  | -10.56084516 | 0.46838076   |
| H | 5.21037098  | -9.37318403  | -7.28184193  | C  | 3.91956733  | -11.57948070 | 0.01495100   |
| C | 3.41892146  | -4.88571898  | -6.35467813  | H  | 3.35582355  | -11.49130087 | -0.90457641  |
| H | 3.37992247  | -3.88699574  | -6.79779305  | N  | 3.89255261  | -12.63640405 | 0.81134893   |
| H | 2.88618250  | -4.84475227  | -5.39974596  | H  | 4.68370762  | -8.44251327  | -3.38654570  |
| C | 4.85940413  | -5.24740879  | -6.12491676  | C  | 4.71104922  | -12.28744102 | 1.85181895   |
| C | 5.19398781  | -6.37093287  | -5.17706890  | H  | 4.85291567  | -12.95134384 | 2.69952506   |
| O | 4.25279209  | -6.97158033  | -4.59591750  | Cu | 4.94247585  | -8.87544151  | -0.53390912  |
| C | 6.55939519  | -6.71453318  | -4.97678043  | O  | 7.35842438  | -10.22375638 | -3.80288937  |
| H | 6.77256989  | -7.47423345  | -4.23021204  | H  | 7.81142325  | -10.98514307 | -3.37056680  |
| C | 7.60940659  | -6.07650224  | -5.64839917  | H  | 8.05364381  | -9.52879074  | -3.82877012  |
| O | 8.83849442  | -6.36082990  | -5.54964393  | O  | 2.95134764  | -8.44567273  | -0.51313731  |
| C | 7.26162442  | -4.94243014  | -6.61941218  | H  | 2.52290486  | -8.25567020  | -1.37774194  |
| O | 8.12522208  | -4.40782754  | -7.29747521  | H  | 2.35519561  | -9.02752911  | 0.04816666   |
| C | 5.84915027  | -4.55198920  | -6.71818910  | O  | 4.90278801  | -9.21570645  | -2.82435049  |
| H | 5.65498240  | -3.69593773  | -7.35358952  | H  | 5.79203620  | -9.52200612  | -3.10907953  |
| C | -0.78177432 | -1.37143731  | -3.46705326  | O  | 1.96427456  | -7.24041641  | -2.90180794  |
| H | -1.08502372 | -1.05761905  | -2.45773679  | H  | 2.76314459  | -6.92609748  | -3.36211989  |
| H | -0.74637233 | -0.46184610  | -4.07721381  | H  | 1.36891187  | -7.50097432  | -3.63218343  |
| C | 0.59110259  | -1.99735816  | -3.41275706  | C  | 14.36707668 | -7.43472671  | -0.51435293  |
| C | 1.03800099  | -2.70975744  | -2.29342061  | C  | 6.97180396  | 2.21926652   | -5.63393596  |
| H | 0.35450359  | -2.87358553  | -1.46071258  | C  | 4.21952143  | -7.71150937  | -10.28792205 |
| C | 2.33714371  | -3.20450082  | -2.20647803  | C  | 2.65845992  | -5.85782101  | -7.29023906  |
| H | 2.67003264  | -3.75949172  | -1.33584516  | C  | -1.88521448 | -2.28292939  | -4.03378857  |
| C | 3.24346237  | -2.97321190  | -3.25666812  | C  | 10.92108678 | -8.75919618  | 1.52400824   |
| O | 4.53307382  | -3.36896798  | -3.21897977  | C  | 6.47979560  | -3.39689507  | 2.04827953   |
| H | 4.77786637  | -3.72814915  | -2.28443637  | C  | 6.49717587  | -10.82952405 | 3.86732819   |
| C | 2.79284965  | -2.29531568  | -4.40094980  |    |             |              |              |

3\*3-, -3H+

|   |             |              |              |    |             |              |              |
|---|-------------|--------------|--------------|----|-------------|--------------|--------------|
| C | 14.55476796 | -7.91502040  | -1.96624322  | H  | 3.44562754  | -1.71475717  | -5.38159425  |
| H | 14.97632114 | -8.92426060  | -1.95192821  | C  | 1.47250232  | -1.55680446  | -4.52522212  |
| H | 15.29250568 | -7.26574087  | -2.44170468  | H  | 1.13201592  | -0.83141500  | -5.26236195  |
| C | 13.24464313 | -7.96354036  | -2.71342156  | C  | 10.45466291 | -8.43662620  | 0.07827026   |
| C | 12.66541584 | -6.83806174  | -3.31063201  | H  | 11.19219762 | -8.87244392  | -0.59565097  |
| H | 13.19747473 | -5.88895316  | -3.31374452  | H  | 10.49418664 | -7.35166420  | -0.07444076  |
| C | 11.38026092 | -6.89378114  | -3.84323635  | C  | 9.08979053  | -8.95787815  | -0.24179086  |
| H | 10.91711754 | -6.00782100  | -4.25985612  | N  | 8.87009020  | -10.28001998 | -0.57662155  |
| C | 10.64340199 | -8.08849071  | -3.77734281  | C  | 7.54865859  | -10.36146086 | -0.70738390  |
| O | 9.38042489  | -8.17877821  | -4.24584018  | H  | 7.01234823  | -11.26756320 | -0.96004341  |
| H | 9.11090597  | -7.31304765  | -4.69662441  | N  | 6.90203812  | -9.18724274  | -0.50023117  |
| C | 11.21634716 | -9.22868518  | -3.20122711  | C  | 7.88917164  | -8.27872825  | -0.20571905  |
| H | 10.60823947 | -10.11763889 | -3.07122914  | H  | 7.65597717  | -7.24433200  | -0.00020618  |
| C | 12.49924716 | -9.14952087  | -2.67655805  | C  | 5.10400679  | -3.78371923  | 1.46313042   |
| H | 12.90701832 | -9.99629255  | -2.13141927  | H  | 4.68160678  | -2.90750792  | 0.95604027   |
| C | 5.94475606  | 1.19871901   | -5.06786594  | H  | 4.43715198  | -4.03124123  | 2.29849110   |
| H | 4.98442250  | 1.32745142   | -5.57564666  | C  | 5.13849761  | -4.92674374  | 0.49474620   |
| H | 5.78452095  | 1.40569230   | -4.00711573  | N  | 5.09422011  | -4.71615849  | -0.86133350  |
| C | 6.32311392  | -0.29515159  | -5.18682298  | H  | 4.78607918  | -8.56069487  | -3.41891546  |
| O | 5.64995022  | -1.10817257  | -4.57996552  | C  | 5.06686852  | -5.94178266  | -1.38763185  |
| O | 7.32775517  | -0.63774898  | -5.99107613  | H  | 5.03623838  | -6.14237894  | -2.44920626  |
| H | 7.43782574  | -1.63275317  | -5.98038729  | N  | 5.07107593  | -6.93265305  | -0.46402337  |
| C | 5.29132486  | -8.68780407  | -9.76148528  | C  | 5.11765183  | -6.28671854  | 0.74939599   |
| H | 5.98696940  | -8.88752851  | -10.57589986 | H  | 5.15406749  | -6.83760558  | 1.68159330   |
| H | 4.82028460  | -9.62928816  | -9.47875815  | C  | 6.01462857  | -10.24416235 | 2.54625169   |
| C | 6.09070717  | -8.05685639  | -8.61223561  | H  | 6.88572049  | -9.92120779  | 1.96861126   |
| O | 6.83502480  | -7.08682040  | -8.81210308  | H  | 5.43045294  | -9.34038325  | 2.76891752   |
| N | 5.92592458  | -8.61444662  | -7.40355859  | C  | 5.15129535  | -11.15430721 | 1.70631174   |
| H | 6.33625525  | -8.14380009  | -6.59770076  | N  | 4.64075417  | -10.71965305 | 0.48836375   |
| H | 5.20288599  | -9.31549248  | -7.24598374  | C  | 3.88854911  | -11.69478164 | 0.00690153   |
| C | 3.33682467  | -4.87576279  | -6.33322618  | H  | 3.32920790  | -11.63429087 | -0.91460314  |
| H | 3.25375793  | -3.86834504  | -6.74909988  | N  | 3.87820125  | -12.75264391 | 0.84717236   |
| H | 2.78517680  | -4.88369310  | -5.38754564  | H  | 3.40878318  | -13.65120682 | 0.69237435   |
| C | 4.77525041  | -5.15401532  | -6.04752316  | C  | 4.67263386  | -12.42403537 | 1.93107400   |
| C | 5.14668636  | -6.31905807  | -5.15050379  | H  | 4.79300241  | -13.09695321 | 2.76760124   |
| O | 4.22352899  | -7.02867851  | -4.67417408  | Cu | 4.98206994  | -8.90964606  | -0.63642957  |
| C | 6.52069012  | -6.57383622  | -4.93395134  | O  | 7.46246299  | -10.16169241 | -3.83737876  |
| H | 6.78752764  | -7.42389156  | -4.31336360  | H  | 7.88385340  | -10.88536001 | -3.31212241  |
| C | 7.53282805  | -5.73552441  | -5.42882342  | H  | 8.12726470  | -9.44101274  | -3.80349213  |
| O | 8.76742061  | -5.96806973  | -5.39972039  | O  | 2.96663174  | -8.92432939  | -0.89788323  |
| C | 7.09124580  | -4.38727206  | -6.01134174  | H  | 2.54527940  | -8.26021998  | -1.49221446  |
| O | 7.86249428  | -3.42377011  | -6.04036537  | H  | 2.36895818  | -9.14512736  | -0.13629034  |
| C | 5.71436332  | -4.28019027  | -6.46119903  | O  | 5.01088267  | -9.35583430  | -2.89670383  |
| H | 5.45703427  | -3.38972000  | -7.02459606  | H  | 5.94705951  | -9.57803779  | -3.12639336  |
| C | -0.78835822 | -1.38174604  | -3.44944568  | O  | 2.01463818  | -7.12345776  | -2.85467960  |
| H | -1.05163375 | -1.14990261  | -2.40643191  | H  | 2.84846208  | -6.89138598  | -3.30661102  |
| H | -0.80261771 | -0.43042611  | -3.99312031  | H  | 1.44181774  | -7.43032639  | -3.58344649  |
| C | 0.59610938  | -1.97718537  | -3.52112167  | C  | 14.36444314 | -7.44017202  | -0.51718661  |
| C | 1.05916037  | -2.92242697  | -2.59388865  | C  | 6.97677208  | 2.20883748   | -5.63922747  |
| H | 0.39568419  | -3.25184680  | -1.79585522  | C  | 4.20798455  | -7.71797182  | -10.28734326 |
| C | 2.35377140  | -3.42916524  | -2.64986084  | C  | 2.64245469  | -5.86291777  | -7.29611033  |
| H | 2.74391058  | -4.13404785  | -1.92261377  | C  | -1.89259735 | -2.28299706  | -4.03143021  |
| C | 3.22284291  | -2.97709304  | -3.65312041  | C  | 10.91219685 | -8.76104357  | 1.52141713   |
| O | 4.46918392  | -3.50048505  | -3.70010479  | C  | 6.48432944  | -3.39272244  | 2.05143609   |
| H | 5.07580502  | -2.84365163  | -4.08973538  | C  | 6.48935286  | -10.84349146 | 3.86985551   |
| C | 2.76857360  | -2.05192710  | -4.60475561  |    |             |              |              |



4\*3-, -3H+

|   |             |              |              |    |             |              |              |
|---|-------------|--------------|--------------|----|-------------|--------------|--------------|
| C | 14.55981594 | -7.89947623  | -1.96765566  | H  | 3.49938671  | -2.12939382  | -5.14457644  |
| H | 15.00405613 | -8.89811921  | -1.96080402  | C  | 1.49424792  | -1.82384562  | -4.42465658  |
| H | 15.27844985 | -7.23111307  | -2.44491806  | H  | 1.18215082  | -1.28601947  | -5.31987451  |
| C | 13.24425803 | -7.98072935  | -2.69940334  | C  | 10.48584714 | -8.44020210  | 0.07251709   |
| C | 12.59884409 | -6.86833570  | -3.25779550  | H  | 11.24216749 | -8.85093352  | -0.59944426  |
| H | 13.09221984 | -5.89850520  | -3.26364532  | H  | 10.50570154 | -7.35715169  | -0.07944785  |
| C | 11.30342601 | -6.96709588  | -3.75194738  | C  | 9.13015136  | -8.94670194  | -0.27563898  |
| H | 10.79585559 | -6.09858597  | -4.15445714  | N  | 8.83472619  | -10.27701773 | -0.56286197  |
| C | 10.61033588 | -8.19541985  | -3.69679663  | C  | 7.50818807  | -10.36023893 | -0.84488252  |
| O | 9.34235466  | -8.31413283  | -4.09928131  | H  | 6.97796098  | -11.25337792 | -1.13063652  |
| H | 9.05462450  | -7.46015736  | -4.65503561  | N  | 6.95350279  | -9.17033196  | -0.75426156  |
| C | 11.27003550 | -9.32590334  | -3.18911613  | C  | 7.94071044  | -8.28239434  | -0.40222163  |
| H | 10.72544659 | -10.26405253 | -3.13946221  | H  | 7.71826098  | -7.23657163  | -0.26116351  |
| C | 12.55928034 | -9.20074133  | -2.68726381  | C  | 5.11478635  | -3.75646140  | 1.42660554   |
| H | 13.03995003 | -10.04075431 | -2.19391743  | H  | 4.70588343  | -2.86688944  | 0.93048310   |
| C | 5.91239150  | 1.25040359   | -5.04157307  | H  | 4.42934301  | -4.01282938  | 2.24236703   |
| H | 4.97305181  | 1.36305594   | -5.59128970  | C  | 5.17308839  | -4.88665157  | 0.44931949   |
| H | 5.71790695  | 1.51979416   | -3.99988518  | N  | 5.05021803  | -4.71172695  | -0.91376718  |
| C | 6.33460611  | -0.23068729  | -5.10773444  | H  | 9.49927799  | -11.04158397 | -0.59302767  |
| O | 5.54000266  | -0.90496498  | -4.26497224  | C  | 5.06077506  | -5.95711627  | -1.41471546  |
| O | 7.18309627  | -0.72891851  | -5.81435350  | H  | 4.94481473  | -6.18614936  | -2.46419744  |
| H | 5.71529548  | -1.86952107  | -4.22467567  | N  | 5.18154116  | -6.91169109  | -0.47920221  |
| C | 5.28760446  | -8.69589239  | -9.76752483  | C  | 5.24851276  | -6.24103143  | 0.71185433   |
| H | 5.98376786  | -8.89258220  | -10.58223829 | H  | 5.33582689  | -6.76632679  | 1.65516967   |
| H | 4.81179801  | -9.63748045  | -9.49177550  | C  | 5.99433657  | -10.23648476 | 2.57707156   |
| C | 6.08932404  | -8.07831346  | -8.61337422  | H  | 6.85575690  | -9.90796453  | 1.98420698   |
| O | 6.84103004  | -7.11451939  | -8.81197342  | H  | 5.41677736  | -9.33418813  | 2.81703994   |
| N | 5.91795817  | -8.63927122  | -7.40745500  | C  | 5.12187420  | -11.14695101 | 1.75753089   |
| H | 6.31309095  | -8.16914114  | -6.59285754  | N  | 4.63315516  | -10.68430775 | 0.55447948   |
| H | 5.18626298  | -9.33216397  | -7.25560091  | C  | 3.91128721  | -11.65923199 | 0.03630010   |
| C | 3.40024164  | -4.85964972  | -6.37656254  | H  | 3.43012405  | -11.60507324 | -0.92879340  |
| H | 3.35729316  | -3.86815701  | -6.83752405  | N  | 3.89188669  | -12.74227659 | 0.85646489   |
| H | 2.86805801  | -4.81281679  | -5.42184856  | H  | 3.41892660  | -13.63497622 | 0.68358357   |
| C | 4.83927215  | -5.20675826  | -6.13070267  | C  | 4.66396177  | -12.43024602 | 1.96310309   |
| C | 5.14324706  | -6.31647395  | -5.15390960  | H  | 4.77559060  | -13.11825233 | 2.78968838   |
| O | 4.18637613  | -6.87203383  | -4.57979160  | Cu | 4.93226122  | -8.81798437  | -1.05251759  |
| C | 6.51020511  | -6.68058924  | -4.93564375  | O  | 7.37217445  | -10.27168238 | -3.82883621  |
| H | 6.69712793  | -7.45676415  | -4.19710850  | H  | 7.86766815  | -11.02633442 | -3.43353928  |
| C | 7.57187977  | -6.04094635  | -5.57384578  | H  | 8.00638001  | -9.52781460  | -3.78690793  |
| O | 8.80588209  | -6.32632126  | -5.45439729  | O  | 2.88380491  | -8.47772309  | -0.75169622  |
| C | 7.25323364  | -4.89384844  | -6.53734260  | H  | 2.36136035  | -8.26739286  | -1.55910634  |
| O | 8.13948759  | -4.32908186  | -7.16319321  | H  | 2.35959956  | -9.05469518  | -0.14055913  |
| C | 5.84259646  | -4.51368955  | -6.70093562  | O  | 4.80684030  | -10.10645874 | -2.38365593  |
| H | 5.66772495  | -3.66274231  | -7.34931959  | H  | 5.64218374  | -10.06824584 | -2.88253444  |
| C | -0.79120249 | -1.37172032  | -3.45807696  | O  | 1.87218541  | -7.15504414  | -2.94904298  |
| H | -1.10518952 | -1.05023978  | -2.45327929  | H  | 2.73814196  | -6.98612995  | -3.36802467  |
| H | -0.74187582 | -0.46583526  | -4.07325738  | H  | 1.30620583  | -7.41939356  | -3.70445730  |
| C | 0.57829620  | -2.00643800  | -3.38209984  | C  | 14.36903089 | -7.43562344  | -0.51670862  |
| C | 1.00940823  | -2.71844501  | -2.25594881  | C  | 6.97217681  | 2.21745058   | -5.63490785  |
| H | 0.31340427  | -2.89449809  | -1.43515957  | C  | 4.20952039  | -7.71676201  | -10.28680010 |
| C | 2.31025476  | -3.20487674  | -2.14950054  | C  | 2.65063688  | -5.85638236  | -7.29643524  |
| H | 2.63592038  | -3.75508981  | -1.27328116  | C  | -1.89288097 | -2.28119928  | -4.03258089  |
| C | 3.23362625  | -2.96923263  | -3.18426381  | C  | 10.92022888 | -8.76042434  | 1.52287235   |
| O | 4.52454258  | -3.34525907  | -3.12143860  | C  | 6.48372777  | -3.39141115  | 2.05167829   |
| H | 4.75881825  | -3.72891973  | -2.19088986  | C  | 6.49272631  | -10.84490449 | 3.88055516   |
| C | 2.79485372  | -2.30128276  | -4.34038103  |    |             |              |              |

5\*3-, -3H+

|   |             |              |              |    |             |              |              |
|---|-------------|--------------|--------------|----|-------------|--------------|--------------|
| C | 14.55252372 | -7.91318784  | -1.96817970  | H  | 3.51162899  | -1.77351173  | -5.25022739  |
| H | 14.96543880 | -8.92633119  | -1.95575737  | C  | 1.49935325  | -1.61174704  | -4.48834780  |
| H | 15.29841867 | -7.27008618  | -2.43979263  | H  | 1.18312167  | -0.91865685  | -5.26624121  |
| C | 13.24476890 | -7.94525444  | -2.72174893  | C  | 10.46238440 | -8.44301016  | 0.07558737   |
| C | 12.67187501 | -6.80830645  | -3.30375981  | H  | 11.21564097 | -8.86585612  | -0.59186593  |
| H | 13.21007461 | -5.86189481  | -3.29294166  | H  | 10.48934745 | -7.35700175  | -0.07888079  |
| C | 11.38724059 | -6.84876348  | -3.84039983  | C  | 9.11185256  | -8.98529770  | -0.27373529  |
| H | 10.93133245 | -5.95336211  | -4.24531792  | N  | 8.89762437  | -10.31849260 | -0.55621233  |
| C | 10.64355657 | -8.04169546  | -3.80064946  | C  | 7.58836888  | -10.38570762 | -0.80145083  |
| O | 9.38410628  | -8.12351584  | -4.27120219  | H  | 7.05682661  | -11.28764283 | -1.07625738  |
| H | 9.10954293  | -7.24932394  | -4.69057007  | N  | 6.94325980  | -9.19928044  | -0.71129605  |
| C | 11.21272154 | -9.19469531  | -3.24290683  | C  | 7.91999567  | -8.29402249  | -0.37466733  |
| H | 10.60008826 | -10.08496184 | -3.14178655  | H  | 7.70041575  | -7.24716183  | -0.22841407  |
| C | 12.49160614 | -9.12791961  | -2.70779168  | C  | 5.11155422  | -3.75890351  | 1.44538785   |
| H | 12.89712560 | -9.98659515  | -2.18062167  | H  | 4.68259356  | -2.86564784  | 0.97197228   |
| C | 5.93556745  | 1.21578657   | -5.05693642  | H  | 4.44146595  | -4.03674662  | 2.26512488   |
| H | 4.98317894  | 1.33450742   | -5.58094722  | C  | 5.16701139  | -4.89062566  | 0.48138336   |
| H | 5.76171144  | 1.45296187   | -4.00508835  | N  | 5.16872549  | -4.74278060  | -0.89426888  |
| C | 6.31427315  | -0.27942663  | -5.13108816  | H  | 5.15276304  | -3.89016511  | -1.44300367  |
| O | 5.67569059  | -1.07051516  | -4.45285277  | C  | 5.15909433  | -5.98353837  | -1.44681927  |
| O | 7.27157700  | -0.64243356  | -5.97311236  | H  | 5.13360116  | -6.16948386  | -2.50882717  |
| H | 7.40165685  | -1.64294020  | -5.94236212  | N  | 5.15095742  | -6.90323494  | -0.50451846  |
| C | 5.28902702  | -8.68566392  | -9.75603507  | C  | 5.15101417  | -6.24575510  | 0.69619312   |
| H | 5.98802961  | -8.88619030  | -10.56786796 | H  | 5.14678500  | -6.78685846  | 1.63180474   |
| H | 4.81765694  | -9.62639525  | -9.47231641  | C  | 6.00086640  | -10.23989004 | 2.56524097   |
| C | 6.08838870  | -8.05355013  | -8.60406042  | H  | 6.86375294  | -9.94125518  | 1.95923241   |
| O | 6.82901692  | -7.07913071  | -8.80597434  | H  | 5.44211838  | -9.32088109  | 2.79607475   |
| N | 5.92322885  | -8.61169067  | -7.39789534  | C  | 5.10363553  | -11.14257198 | 1.76361235   |
| H | 6.34923365  | -8.16086728  | -6.59123069  | N  | 4.56553408  | -10.67738080 | 0.58143581   |
| H | 5.21195941  | -9.32449772  | -7.23611722  | C  | 3.85369084  | -11.66366435 | 0.07152629   |
| C | 3.31246107  | -4.82458507  | -6.36132566  | H  | 3.34048971  | -11.61326675 | -0.87810075  |
| H | 3.21284016  | -3.82872754  | -6.80401164  | N  | 3.87775345  | -12.75397624 | 0.87987570   |
| H | 2.75938918  | -4.82902863  | -5.41526966  | H  | 3.42804606  | -13.65716434 | 0.70223769   |
| C | 4.74908654  | -5.06622688  | -6.05512101  | C  | 4.67344831  | -12.43510853 | 1.96722701   |
| C | 5.10469183  | -6.24983122  | -5.17475673  | H  | 4.82768336  | -13.12851501 | 2.78253729   |
| O | 4.16293539  | -6.93009968  | -4.72498461  | Cu | 5.01263877  | -8.94369521  | -1.02996155  |
| C | 6.47975443  | -6.50870847  | -4.93160071  | O  | 7.45603153  | -10.18701039 | -3.87241359  |
| H | 6.72846962  | -7.39801339  | -4.35730738  | H  | 7.87908286  | -10.91012308 | -3.35224749  |
| C | 7.49413471  | -5.65847089  | -5.39203718  | H  | 8.04037625  | -9.42168063  | -3.72256670  |
| O | 8.73279655  | -5.87303320  | -5.35570419  | O  | 2.92989715  | -8.51250878  | -0.72576019  |
| C | 7.05377978  | -4.29272970  | -5.93204833  | H  | 2.40671113  | -8.33981198  | -1.53524325  |
| O | 7.82845690  | -3.32903642  | -5.92136688  | H  | 2.40511431  | -9.08448599  | -0.10986904  |
| C | 5.68230901  | -4.15926701  | -6.40173449  | O  | 4.84911346  | -9.96965534  | -2.57642448  |
| H | 5.43840806  | -3.25617932  | -6.95104110  | H  | 5.73742974  | -9.99029275  | -2.97955700  |
| C | -0.78773762 | -1.37742942  | -3.46456578  | O  | 1.94592145  | -7.11537506  | -2.98049054  |
| H | -1.06024279 | -1.11492145  | -2.43172546  | H  | 2.82382267  | -7.14889447  | -3.40692127  |
| H | -0.78467462 | -0.44137988  | -4.03361175  | H  | 1.34519085  | -7.38138550  | -3.70816521  |
| C | 0.59031683  | -1.98965856  | -3.49608562  | C  | 14.36483457 | -7.44078426  | -0.51793372  |
| C | 1.01519497  | -2.91250770  | -2.53151719  | C  | 6.97479518  | 2.20946791   | -5.63819749  |
| H | 0.31845131  | -3.23378378  | -1.76058257  | C  | 4.20581630  | -7.71827132  | -10.28763635 |
| C | 2.31317227  | -3.41347393  | -2.52227898  | C  | 2.64233600  | -5.85627250  | -7.29791977  |
| H | 2.63367788  | -4.14047618  | -1.78394887  | C  | -1.89298583 | -2.28356621  | -4.03416045  |
| C | 3.22774058  | -2.95875000  | -3.47890126  | C  | 10.91351453 | -8.76185142  | 1.52339156   |
| O | 4.51861749  | -3.38887204  | -3.39784868  | C  | 6.48644792  | -3.38967646  | 2.05068870   |
| H | 5.08758130  | -2.78012734  | -3.91306603  | C  | 6.49243902  | -10.84210787 | 3.87682912   |
| C | 2.80418764  | -2.09281842  | -4.49334879  |    |             |              |              |

6\*3-, -3H+

|   |             |              |              |    |             |              |              |
|---|-------------|--------------|--------------|----|-------------|--------------|--------------|
| C | 14.55720378 | -7.89587271  | -1.97099116  | H  | 3.43452760  | -1.73308350  | -5.41087914  |
| H | 14.97240576 | -8.90786079  | -1.96840506  | C  | 1.46913554  | -1.56242432  | -4.53902410  |
| H | 15.30243888 | -7.24781724  | -2.43561709  | H  | 1.12120103  | -0.84567327  | -5.28147059  |
| C | 13.24845605 | -7.92304613  | -2.72221071  | C  | 10.49077923 | -8.43563146  | 0.07064055   |
| C | 12.63669758 | -6.77602770  | -3.24836346  | H  | 11.24207560 | -8.85940135  | -0.60090118  |
| H | 13.14227320 | -5.81443535  | -3.19381365  | H  | 10.52780753 | -7.35353309  | -0.08206601  |
| C | 11.35627546 | -6.83023844  | -3.78707627  | C  | 9.12778447  | -8.92056932  | -0.27905165  |
| H | 10.86960284 | -5.93393520  | -4.15235919  | N  | 8.82439215  | -10.24243124 | -0.59898367  |
| C | 10.64714320 | -8.04791916  | -3.81567516  | C  | 7.49717626  | -10.30943175 | -0.88459494  |
| O | 9.39864408  | -8.13923878  | -4.28896436  | H  | 6.95628096  | -11.18738713 | -1.19780687  |
| H | 9.09983293  | -7.24258246  | -4.72994589  | N  | 6.95255614  | -9.11798671  | -0.76556855  |
| C | 11.26657352 | -9.20981316  | -3.32932641  | C  | 7.94232417  | -8.24420334  | -0.38864041  |
| H | 10.70724809 | -10.14103661 | -3.34610112  | H  | 7.71975526  | -7.20205569  | -0.21680426  |
| C | 12.54287062 | -9.12974450  | -2.78462492  | C  | 5.09963909  | -3.79212939  | 1.48513304   |
| H | 12.99541919 | -10.00003583 | -2.31904393  | H  | 4.65822173  | -2.91297378  | 1.00078025   |
| C | 5.94272634  | 1.19436197   | -5.07240488  | H  | 4.44946657  | -4.06691063  | 2.32541614   |
| H | 4.98375656  | 1.32068887   | -5.58353791  | C  | 5.14698143  | -4.90886612  | 0.49295029   |
| H | 5.77859267  | 1.39580504   | -4.01033080  | N  | 5.08737221  | -4.65095372  | -0.85335575  |
| C | 6.32658550  | -0.29761284  | -5.19470744  | H  | 9.48105086  | -11.01254381 | -0.63214549  |
| O | 5.65122392  | -1.11073604  | -4.59124369  | C  | 5.09465025  | -5.86231589  | -1.41356836  |
| O | 7.33924086  | -0.63850656  | -5.99163477  | H  | 5.04097678  | -6.03337213  | -2.47986085  |
| H | 7.44968964  | -1.63382237  | -5.98229513  | N  | 5.15088222  | -6.88422870  | -0.52480532  |
| C | 5.28826074  | -8.69178379  | -9.76235744  | C  | 5.17908516  | -6.27704731  | 0.70548156   |
| H | 5.98250555  | -8.89510474  | -10.57721764 | H  | 5.20364975  | -6.85615500  | 1.62176969   |
| H | 4.81241980  | -9.63064637  | -9.47821140  | C  | 5.99694609  | -10.23595562 | 2.57410768   |
| C | 6.09103358  | -8.06311471  | -8.61391585  | H  | 6.85883621  | -9.90006010  | 1.98695586   |
| O | 6.84605750  | -7.10287193  | -8.82255340  | H  | 5.41789876  | -9.33395270  | 2.81207625   |
| N | 5.92020495  | -8.61067314  | -7.40225680  | C  | 5.12994472  | -11.14508647 | 1.74640204   |
| H | 6.32658306  | -8.13246553  | -6.59867868  | N  | 4.65045579  | -10.67942514 | 0.54147444   |
| H | 5.18686260  | -9.29948538  | -7.23583512  | C  | 3.92970027  | -11.65132878 | 0.01862359   |
| C | 3.34254791  | -4.84729829  | -6.36550076  | H  | 3.45002984  | -11.59289527 | -0.94702647  |
| H | 3.25513802  | -3.84766160  | -6.80080285  | N  | 3.90132260  | -12.73709002 | 0.83748941   |
| H | 2.80087509  | -4.84207343  | -5.41422627  | H  | 3.42493692  | -13.62739085 | 0.66560076   |
| C | 4.78217877  | -5.11948094  | -6.08138225  | C  | 4.66841172  | -12.42767546 | 1.94896660   |
| C | 5.12795271  | -6.29533523  | -5.18996340  | H  | 4.77286628  | -13.11458114 | 2.77741385   |
| O | 4.19710210  | -6.98798303  | -4.74296419  | Cu | 4.94304689  | -8.76553526  | -1.11669314  |
| C | 6.50979722  | -6.56532626  | -4.95357106  | O  | 7.48804673  | -10.17398427 | -3.88977001  |
| H | 6.74702761  | -7.43115369  | -4.34122321  | H  | 7.95704544  | -10.91721441 | -3.44757489  |
| C | 7.52802644  | -5.73700302  | -5.42444753  | H  | 8.12267174  | -9.43026853  | -3.88284737  |
| O | 8.77395533  | -5.97178926  | -5.36899224  | O  | 2.88511304  | -8.53427765  | -0.79284333  |
| C | 7.10877581  | -4.38880206  | -6.01683723  | H  | 2.33916567  | -8.29283179  | -1.57106444  |
| O | 7.89254837  | -3.43391525  | -6.05109876  | H  | 2.36693677  | -9.08548945  | -0.15377527  |
| C | 5.73629190  | -4.25746906  | -6.47922720  | O  | 4.87585089  | -10.10372043 | -2.42060399  |
| H | 5.50031782  | -3.35806739  | -7.03830792  | H  | 5.69051714  | -10.00182682 | -2.94122427  |
| C | -0.78562811 | -1.38067554  | -3.45017409  | O  | 1.90877934  | -7.12589571  | -2.97712479  |
| H | -1.04761619 | -1.15067548  | -2.40619239  | H  | 2.79704663  | -7.02603994  | -3.36966903  |
| H | -0.80187376 | -0.42829556  | -3.99178990  | H  | 1.35221157  | -7.39255026  | -3.73858101  |
| C | 0.60108469  | -1.97432388  | -3.52425011  | C  | 14.36831284 | -7.43701012  | -0.51738639  |
| C | 1.07064619  | -2.91193307  | -2.59258789  | C  | 6.97439481  | 2.21023515   | -5.63698848  |
| H | 0.41194683  | -3.23816945  | -1.78981891  | C  | 4.20890309  | -7.71651263  | -10.28807990 |
| C | 2.36500822  | -3.41935921  | -2.65303502  | C  | 2.64314740  | -5.85788793  | -7.30108802  |
| H | 2.75740624  | -4.12070114  | -1.92337783  | C  | -1.89164540 | -2.28066397  | -4.03199240  |
| C | 3.22654169  | -2.97432306  | -3.66562882  | C  | 10.91964436 | -8.75953463  | 1.52194478   |
| O | 4.47384627  | -3.49497902  | -3.71776610  | C  | 6.48343419  | -3.39519181  | 2.05712559   |
| H | 5.07452942  | -2.84366067  | -4.12529855  | C  | 6.49200574  | -10.84504764 | 3.87924655   |
| C | 2.76443639  | -2.05828347  | -4.62291400  |    |             |              |              |

7^3-, -3H+

|   |             |              |              |    |             |              |              |
|---|-------------|--------------|--------------|----|-------------|--------------|--------------|
| C | 14.55466180 | -7.91111347  | -1.96479630  | H  | 3.55853942  | -1.62311873  | -5.19031545  |
| H | 14.96402769 | -8.92555600  | -1.95289036  | C  | 1.52988708  | -1.52954842  | -4.46791583  |
| H | 15.30423264 | -7.27142481  | -2.43397264  | H  | 1.24257114  | -0.75501727  | -5.17624334  |
| C | 13.24676562 | -7.93374978  | -2.71573308  | C  | 10.41246980 | -8.48607513  | 0.07185557   |
| C | 12.66783362 | -6.78613738  | -3.27384649  | H  | 11.16207023 | -8.88629254  | -0.61484814  |
| H | 13.19933862 | -5.83760634  | -3.24176798  | H  | 10.39333871 | -7.40620105  | -0.10066545  |
| C | 11.38819048 | -6.82061598  | -3.81567318  | C  | 9.05143742  | -9.03808930  | -0.24052192  |
| H | 10.92799596 | -5.91919242  | -4.20011796  | N  | 8.72692643  | -10.38977503 | -0.32690848  |
| C | 10.64731665 | -8.01932997  | -3.81519966  | C  | 7.41558180  | -10.50067452 | -0.64906798  |
| O | 9.39896797  | -8.09103907  | -4.29586677  | H  | 6.87415419  | -11.42990649 | -0.72748610  |
| H | 9.12113382  | -7.18144705  | -4.71020042  | N  | 6.88323105  | -9.30746795  | -0.80132798  |
| C | 11.23078446 | -9.18351827  | -3.28915717  | C  | 7.88330582  | -8.39134438  | -0.55587633  |
| H | 10.64373452 | -10.09730864 | -3.27120870  | H  | 7.68812818  | -7.33451616  | -0.60775553  |
| C | 12.50837455 | -9.12325418  | -2.74430982  | C  | 5.10957357  | -3.72223072  | 1.43919844   |
| H | 12.92973630 | -9.99350921  | -2.24867331  | H  | 4.69550703  | -2.81593587  | 0.97714218   |
| C | 5.93200158  | 1.20865409   | -5.04970465  | H  | 4.43031610  | -4.00311383  | 2.25078573   |
| H | 4.98789755  | 1.31100372   | -5.59140719  | C  | 5.17962109  | -4.83732576  | 0.46509659   |
| H | 5.73975574  | 1.44652256   | -4.00048459  | N  | 5.10876227  | -4.70298885  | -0.91050936  |
| C | 6.33516395  | -0.28350498  | -5.11215736  | H  | 4.99597582  | -3.86132173  | -1.46429458  |
| O | 5.73042916  | -1.07282240  | -4.40314060  | C  | 5.19334705  | -5.94841982  | -1.45220036  |
| O | 7.26628082  | -0.64647386  | -5.98329566  | H  | 5.10750333  | -6.16400503  | -2.50478521  |
| H | 7.40299127  | -1.64678831  | -5.94292029  | N  | 5.32260845  | -6.85166019  | -0.50280009  |
| C | 5.27697659  | -8.70845479  | -9.78018975  | C  | 5.30778827  | -6.18225057  | 0.68771669   |
| H | 5.95559271  | -8.92229417  | -10.60471648 | H  | 5.38263245  | -6.70998351  | 1.62970419   |
| H | 4.79205722  | -9.64106635  | -9.49069626  | C  | 6.06352079  | -10.12962260 | 2.57622155   |
| C | 6.10972557  | -8.10212923  | -8.64589313  | H  | 6.95604036  | -9.69639565  | 2.09917531   |
| O | 6.83583438  | -7.11725076  | -8.84568607  | H  | 5.42496976  | -9.27603523  | 2.85123926   |
| N | 6.02485151  | -8.72307281  | -7.46243276  | C  | 5.31400037  | -11.00010491 | 1.61486169   |
| H | 6.46509930  | -8.27419609  | -6.66372224  | N  | 4.60821135  | -10.47658305 | 0.54894064   |
| H | 5.26667579  | -9.37888751  | -7.27331355  | C  | 4.12708286  | -11.57205109 | -0.11111231  |
| C | 3.33493416  | -4.87635303  | -6.33387220  | H  | 3.49470678  | -11.47594990 | -0.98675868  |
| H | 3.21682977  | -3.85702932  | -6.71420428  | N  | 4.46443706  | -12.73577156 | 0.42770283   |
| H | 2.81163074  | -4.93639842  | -5.37148864  | H  | 5.59562500  | -13.12240462 | 2.20961497   |
| C | 4.78222530  | -5.13373957  | -6.08236284  | C  | 5.19869110  | -12.37554006 | 1.52703343   |
| C | 5.18715112  | -6.43434914  | -5.41902318  | H  | 9.32002807  | -11.17158406 | -0.10275398  |
| O | 4.33409682  | -7.31751416  | -5.26540452  | Cu | 4.78614708  | -9.02699150  | -0.83634360  |
| C | 6.55977385  | -6.59396034  | -5.05747373  | O  | 7.39764863  | -10.11496552 | -3.88518508  |
| H | 6.83110184  | -7.51914090  | -4.55818141  | H  | 7.79004792  | -10.85112667 | -3.37256847  |
| C | 7.54545833  | -5.67765769  | -5.39902364  | H  | 8.07237145  | -9.41222906  | -3.85745680  |
| O | 8.79645310  | -5.85642463  | -5.28337992  | O  | 2.90027461  | -8.29493511  | -0.40135770  |
| C | 7.07957003  | -4.31330074  | -5.90969907  | H  | 2.44679902  | -8.02466711  | -1.23450161  |
| O | 7.84355857  | -3.33717028  | -5.90438712  | H  | 2.32507037  | -8.93152807  | 0.12206769   |
| C | 5.69722492  | -4.17840190  | -6.33732922  | O  | 4.46466823  | -8.68974961  | -2.69011509  |
| H | 5.42569490  | -3.22546122  | -6.78082766  | H  | 5.24379552  | -8.78985525  | -3.25728465  |
| C | -0.77879367 | -1.38284177  | -3.47396821  | O  | 2.42949229  | -7.06390827  | -2.83541567  |
| H | -1.03368996 | -1.13348613  | -2.43358602  | H  | 3.27935833  | -7.60644018  | -2.95141945  |
| H | -0.78585051 | -0.44126041  | -4.03307214  | H  | 1.85794071  | -7.36819847  | -3.56084256  |
| C | 0.59726331  | -1.99740635  | -3.53957897  | C  | 14.36681437 | -7.43879367  | -0.51533416  |
| C | 0.99215426  | -3.02485372  | -2.67296188  | C  | 6.96780669  | 2.21536987   | -5.62080973  |
| H | 0.27365018  | -3.41510565  | -1.95805493  | C  | 4.20490405  | -7.71921759  | -10.28988692 |
| C | 2.28125813  | -3.54462271  | -2.68878514  | C  | 2.63993671  | -5.85901898  | -7.30004946  |
| H | 2.56761133  | -4.37824405  | -2.05624801  | C  | -1.89161342 | -2.28417013  | -4.03445457  |
| C | 3.22268634  | -2.99084189  | -3.56408960  | C  | 10.90915359 | -8.76358836  | 1.51700924   |
| O | 4.51075125  | -3.43143615  | -3.47830791  | C  | 6.48613583  | -3.38528100  | 2.05519163   |
| H | 5.09472109  | -2.79825521  | -3.94356204  | C  | 6.49785829  | -10.82603523 | 3.86627922   |
| C | 2.83103128  | -2.02197971  | -4.49334732  |    |             |              |              |

8^3-, -3H+

|   |             |              |              |    |             |              |              |
|---|-------------|--------------|--------------|----|-------------|--------------|--------------|
| C | 14.55262132 | -7.92250666  | -1.96589625  | H  | 3.50941437  | -1.53762015  | -5.32049177  |
| H | 14.97939177 | -8.92930726  | -1.94797571  | C  | 1.49416605  | -1.52212933  | -4.54605712  |
| H | 15.28252186 | -7.27112072  | -2.45032061  | H  | 1.15231918  | -0.77052416  | -5.25447426  |
| C | 13.23861699 | -7.98134448  | -2.70603310  | C  | 10.42960758 | -8.44725661  | 0.08481631   |
| C | 12.70449130 | -6.88551505  | -3.39064595  | H  | 11.19291677 | -8.83350101  | -0.58888782  |
| H | 13.26255533 | -5.95432761  | -3.45126364  | H  | 10.41105000 | -7.36000607  | -0.06019023  |
| C | 11.42606188 | -6.94790623  | -3.94211904  | C  | 9.09608807  | -9.04199878  | -0.26637381  |
| H | 11.00492302 | -6.08585074  | -4.44561673  | N  | 8.93680189  | -10.38009747 | -0.54597943  |
| C | 10.65492064 | -8.10555221  | -3.78701705  | C  | 7.63535519  | -10.50633543 | -0.80424668  |
| H | 9.38241464  | -8.18270104  | -4.25738872  | H  | 7.14904120  | -11.44327327 | -1.04601261  |
| H | 9.20216592  | -7.46359365  | -4.90743965  | N  | 6.93952007  | -9.34657924  | -0.72911479  |
| C | 11.17285195 | -9.21684524  | -3.11793084  | C  | 7.87800945  | -8.39943805  | -0.38817927  |
| H | 10.52945044 | -10.06793499 | -2.91838149  | H  | 7.61771027  | -7.36110620  | -0.25885931  |
| C | 12.45739393 | -9.14076726  | -2.59349302  | C  | 5.12818888  | -3.72852869  | 1.39681954   |
| H | 12.83543360 | -9.96761385  | -1.99684924  | H  | 4.73635667  | -2.82820149  | 0.90562956   |
| C | 5.91030762  | 1.23545283   | -5.04823059  | H  | 4.42347967  | -3.98938192  | 2.19288730   |
| H | 4.95065384  | 1.39327515   | -5.55672161  | C  | 5.20239468  | -4.86524839  | 0.43605046   |
| H | 5.75215901  | 1.46682333   | -3.99042037  | N  | 5.08624331  | -4.76631745  | -0.94205443  |
| C | 6.28298076  | -0.30044697  | -5.18803908  | H  | 5.02156205  | -3.93091744  | -1.52053321  |
| O | 5.52316551  | -1.00673227  | -4.43887456  | C  | 5.09450606  | -6.03243360  | -1.44457278  |
| O | 7.15385989  | -0.69562091  | -5.97318933  | H  | 4.93327474  | -6.27811174  | -2.48165793  |
| H | 6.58619880  | -5.49205437  | -4.04261191  | N  | 5.21584116  | -6.91662175  | -0.47687144  |
| C | 5.28753915  | -8.69742696  | -9.77299688  | C  | 5.27824082  | -6.21057151  | 0.69206507   |
| H | 5.98122354  | -8.89191083  | -10.59008459 | H  | 5.38346733  | -6.70741664  | 1.64712289   |
| H | 4.81319520  | -9.64242344  | -9.50765660  | C  | 6.02063977  | -10.24606914 | 2.55048124   |
| C | 6.10476517  | -8.11073058  | -8.61344133  | H  | 6.89404173  | -9.95076961  | 1.95665752   |
| O | 6.80268669  | -7.09530095  | -8.75406834  | H  | 5.45643363  | -9.32886915  | 2.76818461   |
| N | 6.04392724  | -8.80701621  | -7.46751501  | C  | 5.13422131  | -11.15607148 | 1.74437197   |
| H | 6.51900175  | -8.46453858  | -6.64464527  | N  | 4.61504065  | -10.73278525 | 0.53010644   |
| H | 5.29768981  | -9.48479644  | -7.31140925  | C  | 3.85723286  | -11.71369874 | 0.06945806   |
| C | 3.39191126  | -4.85276952  | -6.36860776  | H  | 3.30092772  | -11.67956990 | -0.85545043  |
| H | 3.26177178  | -3.84066156  | -6.76134907  | N  | 3.84722141  | -12.76099544 | 0.92464796   |
| H | 2.91035601  | -4.88485065  | -5.38417794  | H  | 3.38566757  | -13.66469745 | 0.77106596   |
| C | 4.85997101  | -5.11187045  | -6.20988337  | C  | 4.65314280  | -12.42030461 | 1.99601927   |
| C | 5.27412181  | -6.33165702  | -5.45677664  | H  | 4.77778750  | -13.07917549 | 2.84333106   |
| O | 4.56440107  | -7.30829716  | -5.32836883  | Cu | 4.97994612  | -9.10985921  | -0.87248138  |
| C | 6.66466516  | -6.26492507  | -4.82204101  | O  | 7.23177829  | -9.92946846  | -3.97640841  |
| H | 6.92629078  | -7.21462365  | -4.35332438  | H  | 7.37340103  | -10.51792948 | -3.20912040  |
| C | 7.66554537  | -5.78717123  | -5.83827618  | H  | 8.01402450  | -9.34689369  | -3.93302160  |
| O | 8.75761024  | -6.30387672  | -6.02600554  | O  | 3.00769109  | -8.60707483  | -0.61451242  |
| C | 7.23790180  | -4.58465837  | -6.70119313  | H  | 2.58199251  | -8.30600599  | -1.45680073  |
| O | 8.06836429  | -3.99666087  | -7.36938898  | H  | 2.37611738  | -9.11313220  | -0.03561546  |
| C | 5.80358755  | -4.27643725  | -6.70773137  | O  | 4.71199857  | -9.05074972  | -2.79327256  |
| H | 5.54289512  | -3.36943361  | -7.23726475  | H  | 5.55287327  | -9.13764191  | -3.27328877  |
| C | -0.77397130 | -1.39573061  | -3.46133731  | O  | 2.68205670  | -7.44614665  | -3.01689746  |
| H | -1.01658996 | -1.17509472  | -2.41125588  | H  | 3.50859161  | -8.02956967  | -3.13144545  |
| H | -0.79359219 | -0.43769653  | -3.99261246  | H  | 2.08083719  | -7.68442497  | -3.74129235  |
| C | 0.61003865  | -1.99219858  | -3.56827931  | C  | 14.36640276 | -7.43982409  | -0.51816027  |
| C | 1.07559974  | -2.97926874  | -2.69311688  | C  | 6.96796987  | 2.21648307   | -5.63190309  |
| H | 0.40659666  | -3.37560310  | -1.93226866  | C  | 4.20714405  | -7.71862386  | -10.28696204 |
| C | 2.38903859  | -3.44286910  | -2.74760012  | C  | 2.65101044  | -5.85088799  | -7.29727800  |
| H | 2.72916290  | -4.21794859  | -2.06758257  | C  | -1.89191976 | -2.28447341  | -4.03361849  |
| C | 3.28799856  | -2.89054150  | -3.67316751  | C  | 10.91080445 | -8.76184370  | 1.52337823   |
| O | 4.59531793  | -3.25568819  | -3.64779623  | C  | 6.48832476  | -3.38684306  | 2.04964422   |
| H | 5.13642356  | -2.47002186  | -4.04810253  | C  | 6.49250549  | -10.84321566 | 3.87368328   |
| C | 2.80712720  | -1.96772141  | -4.61712783  |    |             |              |              |

9^3-, -3H+

|   |             |              |              |    |             |              |              |
|---|-------------|--------------|--------------|----|-------------|--------------|--------------|
| C | 14.53710151 | -7.90225234  | -1.97362329  | H  | 3.47865545  | -1.79981934  | -5.27897280  |
| H | 14.93895355 | -8.92039101  | -1.97365510  | C  | 1.46194174  | -1.66525261  | -4.51901552  |
| H | 15.28850266 | -7.26632169  | -2.44584769  | H  | 1.10778444  | -1.06759269  | -5.35694116  |
| C | 13.22012268 | -7.90447498  | -2.71653079  | C  | 10.46800155 | -8.41914492  | 0.07754879   |
| C | 12.62834574 | -6.74212501  | -3.23422489  | H  | 11.17956175 | -8.87618000  | -0.61670441  |
| H | 13.15723676 | -5.79310637  | -3.17724914  | H  | 10.54550243 | -7.33961151  | -0.08405878  |
| C | 11.35347238 | -6.76567974  | -3.78863697  | C  | 9.07791430  | -8.86044328  | -0.22645587  |
| H | 10.89096415 | -5.85479335  | -4.14942102  | N  | 8.76477633  | -10.15514230 | -0.60511311  |
| C | 10.61845108 | -7.96970146  | -3.83877731  | C  | 7.42937331  | -10.24748465 | -0.78532007  |
| O | 9.37846332  | -8.03634710  | -4.33121354  | H  | 6.90015001  | -11.13423723 | -1.09200156  |
| H | 9.06886323  | -7.10184184  | -4.73529179  | N  | 6.87168444  | -9.08036956  | -0.53592963  |
| C | 11.21446549 | -9.14482306  | -3.34809137  | C  | 7.87865042  | -8.20099689  | -0.19901023  |
| H | 10.63893496 | -10.06623844 | -3.37827309  | H  | 7.67622299  | -7.16995075  | 0.04235079   |
| C | 12.48707376 | -9.09513435  | -2.78917967  | C  | 5.11880417  | -3.74006019  | 1.41049603   |
| H | 12.91242693 | -9.98259337  | -2.32996024  | H  | 4.69016195  | -2.82986650  | 0.97145590   |
| C | 5.92806942  | 1.20324307   | -5.07349541  | H  | 4.44298724  | -4.05836086  | 2.20998166   |
| H | 4.96923460  | 1.35043561   | -5.58286127  | C  | 5.18630054  | -4.82686458  | 0.39157348   |
| H | 5.76580709  | 1.41769366   | -4.01344059  | N  | 5.19550301  | -4.64271719  | -0.98033772  |
| C | 6.29953231  | -0.32335664  | -5.20537609  | H  | 5.15865974  | -3.77991222  | -1.52748813  |
| O | 5.55324807  | -1.04485507  | -4.49000810  | C  | 5.16413952  | -5.86129797  | -1.57269414  |
| O | 7.19959919  | -0.72847237  | -5.98921834  | H  | 5.12891431  | -6.01065614  | -2.64054029  |
| H | 7.48488065  | -2.36135921  | -5.95169102  | N  | 5.14363596  | -6.81048135  | -0.65490215  |
| C | 5.28531315  | -8.69838119  | -9.76609406  | C  | 5.14840884  | -6.18495329  | 0.56781634   |
| H | 5.97754698  | -8.90236424  | -10.58254423 | H  | 5.10589703  | -6.75019004  | 1.48860622   |
| H | 4.80804088  | -9.63713900  | -9.48154252  | C  | 6.08212044  | -10.15045472 | 2.56083410   |
| C | 6.09280332  | -8.07185958  | -8.62102081  | H  | 6.99036642  | -9.83594114  | 2.03331155   |
| O | 6.85553891  | -7.11993844  | -8.83291364  | H  | 5.56043807  | -9.21737333  | 2.82438964   |
| N | 5.91613969  | -8.60877230  | -7.40442395  | C  | 5.17975401  | -10.96552770 | 1.68587966   |
| H | 6.31368398  | -8.11654370  | -6.60517480  | N  | 4.63374068  | -10.50253973 | 0.50237316   |
| H | 5.17335382  | -9.28646213  | -7.23401759  | C  | 3.79356035  | -11.49647423 | 0.09560618   |
| C | 3.29952572  | -4.85627924  | -6.31468137  | H  | 3.20506304  | -11.40270037 | -0.80684535  |
| H | 3.24524108  | -3.85658324  | -6.75748747  | N  | 3.74438941  | -12.54037234 | 0.91573066   |
| H | 2.69419481  | -4.83004711  | -5.39700535  | H  | 4.77104395  | -12.85925086 | 2.76711984   |
| C | 4.72272972  | -5.12856692  | -5.94697367  | C  | 4.61050515  | -12.21403924 | 1.90921990   |
| C | 5.10447160  | -6.33004179  | -5.17474832  | H  | 9.42724773  | -10.89916482 | -0.72950351  |
| O | 4.21524342  | -7.14235232  | -4.74764196  | Cu | 4.86702549  | -8.87351081  | -0.65220923  |
| C | 6.48768842  | -6.53642043  | -4.94901843  | O  | 7.51333923  | -10.14053433 | -3.87447125  |
| H | 6.78126757  | -7.44117446  | -4.41948213  | H  | 7.99236926  | -10.89228930 | -3.46330528  |
| C | 7.47800578  | -5.61038024  | -5.33006491  | H  | 8.15929757  | -9.40843408  | -3.92500406  |
| O | 8.73539069  | -5.82758881  | -5.24441438  | O  | 2.90227589  | -8.41138869  | -0.55434112  |
| C | 7.00694511  | -4.28850571  | -5.81000595  | H  | 2.48260705  | -8.24371791  | -1.43620474  |
| O | 7.88374985  | -3.30772369  | -5.87373696  | H  | 2.32831835  | -9.01057335  | 0.00738670   |
| C | 5.65774330  | -4.14107693  | -6.17825675  | O  | 4.75265870  | -9.26522343  | -2.75146181  |
| H | 5.36278120  | -3.19828733  | -6.62679626  | H  | 4.70777845  | -8.53300848  | -3.41108024  |
| C | -0.80086676 | -1.36786849  | -3.46152402  | O  | 2.03973798  | -7.30289435  | -2.97778257  |
| H | -1.08450701 | -1.09822255  | -2.43326844  | H  | 2.83444912  | -7.16501780  | -3.54018853  |
| H | -0.79728712 | -0.43574991  | -4.03769993  | H  | 1.35372929  | -7.53003231  | -3.63781086  |
| C | 0.58233215  | -1.96633961  | -3.47310615  | C  | 14.37001032 | -7.43762843  | -0.51800856  |
| C | 1.05503475  | -2.76274963  | -2.42486445  | C  | 6.97463669  | 2.20617545   | -5.64165165  |
| H | 0.38360707  | -3.03071726  | -1.60951203  | C  | 4.20629380  | -7.71990254  | -10.28746703 |
| C | 2.37823221  | -3.19452413  | -2.38393376  | C  | 2.64018916  | -5.86060592  | -7.29152136  |
| H | 2.74168603  | -3.79914304  | -1.55998510  | C  | -1.89506906 | -2.28432318  | -4.03550031  |
| C | 3.26617183  | -2.80901285  | -3.39737549  | C  | 10.92048194 | -8.75666775  | 1.52172489   |
| O | 4.57755098  | -3.14053312  | -3.28750119  | C  | 6.48536002  | -3.38931113  | 2.04786047   |
| H | 5.11667073  | -2.48414823  | -3.82786336  | C  | 6.49773592  | -10.83024994 | 3.86431756   |
| C | 2.78546063  | -2.08180829  | -4.49690016  |    |             |              |              |

10<sup>3</sup>-, -3H+

|   |             |              |              |    |             |              |              |
|---|-------------|--------------|--------------|----|-------------|--------------|--------------|
| C | 14.55295867 | -7.91178127  | -1.96617831  | H  | 3.47625586  | -1.53799611  | -5.34123056  |
| H | 15.00121514 | -8.90856734  | -1.95383066  | C  | 1.46709463  | -1.51273677  | -4.55320021  |
| H | 15.26602266 | -7.24339763  | -2.45160121  | H  | 1.11824597  | -0.77196966  | -5.26959988  |
| C | 13.23321522 | -8.00351228  | -2.69209585  | C  | 10.43651449 | -8.44713365  | 0.08794402   |
| C | 12.64362513 | -6.91659105  | -3.34688215  | H  | 11.19517715 | -8.83982675  | -0.58722926  |
| H | 13.16570316 | -5.96388750  | -3.40410813  | H  | 10.42549067 | -7.36028339  | -0.06001542  |
| C | 11.35110310 | -7.01690901  | -3.86015778  | C  | 9.09718327  | -9.03164583  | -0.24377546  |
| H | 10.87703180 | -6.16247651  | -4.33184390  | N  | 8.91734990  | -10.36898209 | -0.53303694  |
| C | 10.62543516 | -8.20467078  | -3.69952917  | C  | 7.60535299  | -10.48377750 | -0.72369875  |
| O | 9.33899780  | -8.32548523  | -4.11596175  | H  | 7.10178017  | -11.40687936 | -0.97727620  |
| H | 9.14674037  | -7.63896135  | -4.79128909  | N  | 6.92162523  | -9.32230532  | -0.59492669  |
| C | 11.20533833 | -9.30749875  | -3.06730257  | C  | 7.88064728  | -8.38265958  | -0.29063060  |
| H | 10.59760690 | -10.18310280 | -2.86520403  | H  | 7.63426271  | -7.34610404  | -0.12660806  |
| C | 12.49681854 | -9.19165200  | -2.57488592  | C  | 5.12390038  | -3.72955591  | 1.41341362   |
| H | 12.91663137 | -10.00676342 | -1.99187541  | H  | 4.70469363  | -2.81982894  | 0.96457514   |
| C | 5.91580312  | 1.23373044   | -5.05897462  | H  | 4.43863009  | -4.03314901  | 2.21235831   |
| H | 4.95425715  | 1.40014008   | -5.55870331  | C  | 5.20377800  | -4.82313117  | 0.40718425   |
| H | 5.76643522  | 1.45257047   | -3.99679799  | N  | 5.05902089  | -4.65997524  | -0.95986590  |
| C | 6.28182971  | -0.30173041  | -5.22587390  | H  | 4.98314489  | -3.80224343  | -1.50197094  |
| O | 5.48809787  | -1.01795151  | -4.52303429  | C  | 5.08478775  | -5.89830692  | -1.52515533  |
| O | 7.17705302  | -0.69075764  | -5.98682805  | H  | 4.86934014  | -6.07653126  | -2.56569202  |
| H | 6.55156504  | -6.39717603  | -3.89451350  | N  | 5.24793981  | -6.82778326  | -0.60601221  |
| C | 5.29209440  | -8.70692436  | -9.78676578  | C  | 5.31749181  | -6.17685474  | 0.59443728   |
| H | 5.94481090  | -8.94607318  | -10.62729391 | H  | 5.44462933  | -6.72176609  | 1.52027661   |
| H | 4.81036796  | -9.62400885  | -9.45585886  | C  | 6.00548134  | -10.24476824 | 2.55912854   |
| C | 6.18472734  | -8.24120742  | -8.63844538  | H  | 6.86930368  | -9.94025044  | 1.95862157   |
| O | 6.60784480  | -9.03683976  | -7.83451648  | H  | 5.43802279  | -9.33207722  | 2.78749356   |
| N | 6.69807353  | -6.91701677  | -8.63216206  | C  | 5.11617994  | -11.15364943 | 1.75405877   |
| H | 7.27626903  | -6.80039525  | -7.80383045  | N  | 4.57591937  | -10.70711170 | 0.56112247   |
| H | 6.02645256  | -6.15352950  | -8.68996578  | C  | 3.83300377  | -11.68784750 | 0.07700708   |
| C | 3.38451085  | -4.92053551  | -6.30454089  | H  | 3.27742899  | -11.64042167 | -0.84789058  |
| H | 3.29478425  | -3.88965940  | -6.65517306  | N  | 3.85062955  | -12.75733127 | 0.90325902   |
| H | 2.87243665  | -4.97953294  | -5.33567608  | H  | 3.39849143  | -13.66260085 | 0.73479822   |
| C | 4.83488229  | -5.24212273  | -6.09665000  | C  | 4.66169986  | -12.43342901 | 1.97571540   |
| C | 5.19898841  | -6.58619288  | -5.52514669  | H  | 4.80600394  | -13.11632079 | 2.80037844   |
| O | 4.41875884  | -7.51138922  | -5.49278671  | Cu | 4.99422051  | -9.06562372  | -0.81347585  |
| C | 6.59910256  | -6.75477425  | -4.93663676  | O  | 7.30442712  | -10.26000370 | -3.77438610  |
| H | 6.84155266  | -7.81981540  | -4.90156998  | H  | 7.74038454  | -11.02939340 | -3.33451942  |
| C | 7.63585198  | -5.96527059  | -5.67742328  | H  | 7.90096166  | -9.52930911  | -3.53859336  |
| O | 8.77935667  | -6.36241608  | -5.86648511  | O  | 3.02418535  | -8.47898801  | -0.54320437  |
| C | 7.22373206  | -4.62868448  | -6.34202008  | H  | 2.64501064  | -8.20768852  | -1.41747638  |
| O | 8.07445436  | -3.95826190  | -6.89856137  | H  | 2.39058769  | -9.03791032  | -0.01987172  |
| C | 5.79488298  | -4.32893676  | -6.39306851  | O  | 4.75651189  | -9.19323082  | -2.72998037  |
| H | 5.55852828  | -3.33799346  | -6.76890598  | H  | 5.57949284  | -9.47921902  | -3.16130257  |
| C | -0.79020858 | -1.38048257  | -3.45971173  | O  | 2.85874212  | -7.47478172  | -3.04758110  |
| H | -1.03965865 | -1.16131114  | -2.40994888  | H  | 3.64209292  | -8.12632159  | -3.11844278  |
| H | -0.81429976 | -0.42246216  | -3.99132173  | H  | 2.24705954  | -7.73176837  | -3.75551512  |
| C | 0.59199295  | -1.97003334  | -3.56199411  | C  | 14.36523610 | -7.43882839  | -0.51663600  |
| C | 1.05914165  | -2.94817252  | -2.67939892  | C  | 6.96884318  | 2.21714976   | -5.63612569  |
| H | 0.39229949  | -3.34164239  | -1.91458945  | C  | 4.22123820  | -7.70551199  | -10.27559664 |
| C | 2.37070806  | -3.41220316  | -2.73534724  | C  | 2.64233660  | -5.85696233  | -7.29066997  |
| H | 2.71809223  | -4.17547604  | -2.04851382  | C  | -1.89489188 | -2.28135214  | -4.03558920  |
| C | 3.26359412  | -2.86585531  | -3.66910363  | C  | 10.91295670 | -8.76123664  | 1.52554605   |
| O | 4.56947241  | -3.22955850  | -3.63404733  | C  | 6.48897881  | -3.38635872  | 2.05239531   |
| H | 5.11292444  | -2.46509502  | -4.05951084  | C  | 6.49341228  | -10.84348902 | 3.87347143   |
| C | 2.77939858  | -1.95688799  | -4.62750753  |    |             |              |              |

imq(0°2-)

|   |             |              |              |    |             |              |              |
|---|-------------|--------------|--------------|----|-------------|--------------|--------------|
| C | 14.53432099 | -7.89109390  | -1.96754887  | H  | 3.50763240  | -1.78430326  | -5.22408882  |
| H | 14.96277303 | -8.89693104  | -1.97832506  | C  | 1.47277012  | -1.69048662  | -4.50290759  |
| H | 15.25542771 | -7.23130959  | -2.45276213  | H  | 1.12572636  | -1.09847779  | -5.34742779  |
| C | 13.20368013 | -7.93789727  | -2.68187253  | C  | 10.51737030 | -8.43607890  | 0.07961362   |
| C | 12.56242248 | -6.80509150  | -3.20595764  | H  | 11.27517659 | -8.84477367  | -0.59182148  |
| H | 13.05457402 | -5.83584027  | -3.17154008  | H  | 10.52311118 | -7.35448722  | -0.07976384  |
| C | 11.27854539 | -6.88793807  | -3.73612770  | C  | 9.16744405  | -8.97059119  | -0.25260776  |
| H | 10.77950987 | -6.00363435  | -4.11595567  | N  | 8.91524010  | -10.29360379 | -0.58991642  |
| C | 10.59658661 | -8.12151129  | -3.75595621  | H  | 9.61483366  | -11.01864575 | -0.73424796  |
| O | 9.33692325  | -8.23512318  | -4.21217658  | C  | 7.58460741  | -10.44529193 | -0.75648663  |
| H | 9.05168594  | -7.36738318  | -4.76646219  | H  | 7.10351708  | -11.36781045 | -1.03287793  |
| C | 11.24646040 | -9.26809921  | -3.27748547  | N  | 6.96815272  | -9.29311093  | -0.54588395  |
| H | 10.72230357 | -10.21883645 | -3.31600128  | C  | 7.94061316  | -8.36355860  | -0.24017224  |
| C | 12.52566371 | -9.15970878  | -2.73986928  | H  | 7.69466240  | -7.33561874  | -0.02975794  |
| H | 13.00600025 | -10.02167501 | -2.28756354  | C  | 5.14691277  | -3.78706228  | 1.38299737   |
| C | 5.91634346  | 1.22835373   | -5.08164277  | H  | 4.73417716  | -2.90059696  | 0.88675529   |
| H | 4.95719153  | 1.38941319   | -5.58638224  | H  | 4.44364194  | -4.06766462  | 2.17265477   |
| H | 5.75954652  | 1.44787852   | -4.02118369  | C  | 5.24485763  | -4.92369942  | 0.41242948   |
| C | 6.27743661  | -0.29903680  | -5.22655297  | N  | 5.22004714  | -4.80798440  | -0.96932939  |
| O | 5.51723063  | -1.03821387  | -4.51454187  | H  | 5.15957537  | -3.96490792  | -1.56046027  |
| O | 7.16946826  | -0.68082938  | -6.01093176  | C  | 5.19706031  | -6.04945148  | -1.50086410  |
| C | 5.28009374  | -8.69184353  | -9.77972222  | H  | 5.14409993  | -6.25453093  | -2.55806286  |
| H | 5.96584538  | -8.89860353  | -10.59977857 | N  | 5.20761130  | -6.96204840  | -0.53662845  |
| H | 4.80191376  | -9.62867505  | -9.49220319  | C  | 5.23415896  | -6.27366541  | 0.65765965   |
| C | 6.09221929  | -8.07280789  | -8.63582562  | H  | 5.23698285  | -6.78658014  | 1.60900659   |
| O | 6.84779834  | -7.11576988  | -8.82965184  | C  | 5.98715819  | -10.22579745 | 2.56051934   |
| N | 5.93579872  | -8.64498545  | -7.42744320  | H  | 6.85116899  | -9.86743282  | 1.99319115   |
| H | 6.31589416  | -8.14580674  | -6.62505145  | H  | 5.38502672  | -9.34164918  | 2.81085101   |
| H | 5.18080329  | -9.311117831 | -7.27328280  | C  | 5.14180601  | -11.14006709 | 1.70903992   |
| C | 3.33530663  | -4.90305662  | -6.27847317  | N  | 4.67860393  | -10.74452806 | 0.45307765   |
| H | 3.29615392  | -3.89188539  | -6.69177295  | C  | 3.90525111  | -11.72274426 | -0.00483786  |
| H | 2.73585227  | -4.88624096  | -5.35927322  | H  | 3.36179603  | -11.69848044 | -0.93656387  |
| C | 4.76552609  | -5.21240638  | -5.94028672  | N  | 3.84858465  | -12.73439457 | 0.88116234   |
| C | 5.13888465  | -6.39660726  | -5.10818367  | H  | 3.35659998  | -13.62862370 | 0.74782106   |
| O | 4.23670628  | -7.12923876  | -4.57392793  | C  | 4.62030857  | -12.38521067 | 1.97008383   |
| C | 6.51047789  | -6.68941696  | -4.93812673  | H  | 4.68747427  | -13.01943947 | 2.84247348   |
| H | 6.77039257  | -7.58070518  | -4.37613452  | Cu | 4.98231452  | -8.99950289  | -0.69879603  |
| C | 7.53979201  | -5.86479845  | -5.43612673  | O  | 7.46696931  | -10.16534604 | -3.81612395  |
| O | 8.76429004  | -6.18463833  | -5.44295854  | H  | 7.96731022  | -10.93127201 | -3.44413887  |
| C | 7.13314455  | -4.48565813  | -5.89368880  | H  | 8.14800935  | -9.45411902  | -3.92333827  |
| N | 8.00711443  | -3.55260983  | -5.85628995  | O  | 3.01597163  | -8.85518433  | -0.85712677  |
| C | 5.72203337  | -4.30841791  | -6.24366330  | H  | 2.56771671  | -8.34551186  | -1.59282837  |
| H | 5.46832249  | -3.37276072  | -6.73167077  | H  | 2.38106647  | -9.15083159  | -0.14705896  |
| H | 7.61060701  | -2.60911185  | -6.05183659  | O  | 5.05166246  | -9.25274341  | -2.87584032  |
| C | -0.79895421 | -1.38174507  | -3.46080435  | H  | 4.74735374  | -8.52515331  | -3.47876626  |
| H | -1.08464444 | -1.10903066  | -2.43414643  | H  | 5.94337542  | -9.53502956  | -3.19282736  |
| H | -0.78469036 | -0.45048209  | -4.03690303  | O  | 2.06150818  | -7.34683455  | -2.90457741  |
| C | 0.58241435  | -1.98852301  | -3.46323475  | H  | 2.81356214  | -7.08622426  | -3.48370895  |
| C | 1.05535578  | -2.76612329  | -2.40209671  | H  | 1.36109271  | -7.57836290  | -3.54919609  |
| H | 0.38238328  | -3.01714890  | -1.58276026  | C  | 14.38123911 | -7.43534646  | -0.50811576  |
| C | 2.38603122  | -3.17967023  | -2.34271340  | C  | 6.97423648  | 2.21800580   | -5.65213497  |
| H | 2.74517028  | -3.75557928  | -1.49499103  | C  | 4.20317617  | -7.71084950  | -10.29404600 |
| C | 3.28316061  | -2.79617263  | -3.34916533  | C  | 2.64712440  | -5.86233307  | -7.28197004  |
| O | 4.60226436  | -3.09611828  | -3.22435340  | C  | -1.90136115 | -2.28463640  | -4.03793157  |
| H | 5.13522772  | -2.41259497  | -3.77202846  | C  | 10.94467057 | -8.74641909  | 1.53666692   |
| C | 2.79970371  | -2.09295874  | -4.46512564  | C  | 6.49091239  | -3.40017343  | 2.04986531   |
|   |             |              |              | C  | 6.48251763  | -10.84390922 | 3.86715295   |



imq(0<sup>^</sup>-)

|   |             |              |              |    |             |              |              |
|---|-------------|--------------|--------------|----|-------------|--------------|--------------|
| C | 14.54194968 | -7.89678446  | -1.96357258  | C  | 2.79535915  | -2.13592531  | -4.46210239  |
| H | 14.95658234 | -8.90822076  | -1.96844712  | H  | 3.50064277  | -1.84978942  | -5.23334074  |
| H | 15.27680232 | -7.24892959  | -2.44297417  | C  | 1.48129481  | -1.68281947  | -4.49379118  |
| C | 13.21877451 | -7.92271481  | -2.69008727  | H  | 1.15486099  | -1.05494143  | -5.31982784  |
| C | 12.59700347 | -6.77548366  | -3.20181423  | C  | 10.51887950 | -8.44408903  | 0.08116623   |
| H | 13.09942577 | -5.81293557  | -3.14945514  | H  | 11.27911949 | -8.85208549  | -0.58773509  |
| C | 11.31499481 | -6.83907781  | -3.73852587  | H  | 10.52068402 | -7.36271666  | -0.07778728  |
| H | 10.82591552 | -5.94232230  | -4.09838892  | C  | 9.17094658  | -8.98685492  | -0.25192449  |
| C | 10.62863031 | -8.06313691  | -3.78565706  | N  | 8.92200626  | -10.31049194 | -0.58688445  |
| O | 9.36212291  | -8.15747489  | -4.26108297  | H  | 9.62067114  | -11.04042426 | -0.71593474  |
| H | 9.09270027  | -7.28123694  | -4.70081963  | C  | 7.59066405  | -10.46893626 | -0.74226382  |
| C | 11.25431571 | -9.22576900  | -3.32618429  | H  | 7.11113418  | -11.39408717 | -1.01265266  |
| H | 10.71993959 | -10.16987982 | -3.38166547  | N  | 6.97100203  | -9.31781184  | -0.53188997  |
| C | 12.52910657 | -9.13692034  | -2.77503363  | C  | 7.94222337  | -8.38431055  | -0.23315401  |
| H | 12.99966416 | -10.01076784 | -2.33905033  | H  | 7.69571518  | -7.35842831  | -0.01558499  |
| C | 5.92890529  | 1.23536958   | -5.08499444  | C  | 5.13921394  | -3.80333050  | 1.41800417   |
| H | 4.98747539  | 1.35517649   | -5.62778362  | H  | 4.71262917  | -2.92758649  | 0.91510558   |
| H | 5.73489869  | 1.47679783   | -4.03678452  | H  | 4.45106107  | -4.07360090  | 2.22365963   |
| C | 6.30883452  | -0.25720741  | -5.14919223  | C  | 5.22969203  | -4.95558982  | 0.46871327   |
| O | 5.66117133  | -1.05660310  | -4.48037996  | N  | 5.20570318  | -4.84159874  | -0.91120296  |
| O | 7.28224045  | -0.62038042  | -5.96654814  | H  | 5.13636113  | -4.00008384  | -1.48744448  |
| H | 8.71088230  | -3.66862421  | -5.56955968  | C  | 5.19757684  | -6.08270915  | -1.44629003  |
| C | 5.29347693  | -8.67680764  | -9.77280584  | H  | 5.14523135  | -6.28384825  | -2.50308142  |
| H | 5.98703085  | -8.87431257  | -10.58900017 | N  | 5.21911295  | -6.99186550  | -0.48430262  |
| H | 4.82373757  | -9.61997793  | -9.49185223  | C  | 5.23313088  | -6.30635722  | 0.71223519   |
| C | 6.08764525  | -8.05520149  | -8.62035095  | H  | 5.23752898  | -6.82271566  | 1.66168037   |
| O | 6.82708002  | -7.07716131  | -8.78323310  | C  | 5.98453284  | -10.22908408 | 2.56329316   |
| N | 5.93096153  | -8.64798911  | -7.42088101  | H  | 6.84771071  | -9.87033537  | 1.99483532   |
| H | 6.34011876  | -8.18818437  | -6.61403049  | H  | 5.37912073  | -9.34677286  | 2.81382337   |
| H | 5.20111384  | -9.34430369  | -7.27883382  | C  | 5.14079254  | -11.14932381 | 1.71620223   |
| C | 3.28870515  | -4.90192750  | -6.29186500  | N  | 4.67956577  | -10.76435414 | 0.45585020   |
| H | 3.22222199  | -3.89225413  | -6.70367312  | C  | 3.89827511  | -11.74182532 | 0.00575373   |
| H | 2.70119545  | -4.91017944  | -5.36600910  | H  | 3.35728951  | -11.72372026 | -0.92767879  |
| C | 4.71785165  | -5.17448993  | -5.97281655  | N  | 3.83736040  | -12.74198036 | 0.90103283   |
| C | 5.11333231  | -6.35084548  | -5.12333085  | H  | 3.34414458  | -13.63746721 | 0.77269400   |
| O | 4.22083097  | -7.08818863  | -4.61356990  | C  | 4.60966786  | -12.38757583 | 1.98667454   |
| C | 6.49261210  | -6.59956592  | -4.92095295  | H  | 4.67290326  | -13.01443741 | 2.86456116   |
| H | 6.77587047  | -7.47805686  | -4.35087287  | Cu | 4.98307801  | -9.03263615  | -0.64088512  |
| C | 7.48403067  | -5.72603296  | -5.37930126  | O  | 7.47613488  | -10.13439607 | -3.83069409  |
| O | 8.73069160  | -5.91420552  | -5.31171818  | H  | 7.96050982  | -10.90389148 | -3.44364073  |
| C | 7.02082589  | -4.38829648  | -5.91845367  | H  | 8.16580517  | -9.43847660  | -3.93732240  |
| N | 7.79848168  | -3.36702025  | -5.92017830  | O  | 3.02392179  | -8.79036720  | -0.76266013  |
| C | 5.64113581  | -4.26226129  | -6.32919855  | H  | 2.56661789  | -8.36526506  | -1.53730036  |
| H | 5.37280769  | -3.36461001  | -6.87476615  | H  | 2.37698237  | -9.16322011  | -0.09431402  |
| H | 7.40824620  | -1.62503204  | -5.94556331  | O  | 5.05993378  | -9.23137541  | -2.84822337  |
| C | -0.79656287 | -1.37655329  | -3.46909266  | H  | 4.73837696  | -8.52764302  | -3.45650492  |
| H | -1.07653936 | -1.09965047  | -2.44324046  | H  | 5.95042286  | -9.50636293  | -3.17275751  |
| H | -0.78082358 | -0.44879354  | -4.04972236  | O  | 2.04226902  | -7.35259075  | -2.89656415  |
| C | 0.57757823  | -1.99581067  | -3.47329059  | H  | 2.78419748  | -7.10368898  | -3.48496951  |
| C | 1.01831969  | -2.82446374  | -2.43559084  | H  | 1.33649427  | -7.59630141  | -3.53272935  |
| H | 0.33056650  | -3.08614690  | -1.63428575  | C  | 14.38025839 | -7.43564384  | -0.50616382  |
| C | 2.32861208  | -3.29505296  | -2.38931341  | C  | 6.98037826  | 2.22827458   | -5.65164973  |
| H | 2.66596481  | -3.92101822  | -1.56949564  | C  | 4.20816905  | -7.70845716  | -10.29268720 |
| C | 3.23292526  | -2.90930183  | -3.38215164  | C  | 2.62854268  | -5.87614205  | -7.28932292  |
| O | 4.54295894  | -3.30593449  | -3.27037786  | C  | -1.90172113 | -2.28083696  | -4.03837149  |
| H | 5.09896144  | -2.67003985  | -3.77522273  | C  | 10.94597451 | -8.75122461  | 1.53823764   |
|   |             |              |              | C  | 6.49218682  | -3.40120092  | 2.05377243   |
|   |             |              |              | C  | 6.48350371  | -10.84300485 | 3.86998314   |

imq(keto^-)

|   |             |              |              |    |             |              |              |
|---|-------------|--------------|--------------|----|-------------|--------------|--------------|
| C | 14.52450418 | -7.89108563  | -1.96905810  | C  | 2.77530343  | -2.08074142  | -4.53209628  |
| H | 14.93719550 | -8.90290461  | -1.98604965  | H  | 3.46645358  | -1.74392494  | -5.29374900  |
| H | 15.25460703 | -7.24129654  | -2.45362399  | C  | 1.45135038  | -1.66299944  | -4.52851397  |
| C | 13.19236628 | -7.90642663  | -2.68277379  | H  | 1.09207714  | -1.03444118  | -5.33993612  |
| C | 12.58821594 | -6.75960038  | -3.21985197  | C  | 10.52109488 | -8.44402731  | 0.08206662   |
| H | 13.09789348 | -5.80097581  | -3.17724614  | H  | 11.28239260 | -8.85161465  | -0.58421195  |
| C | 11.30865925 | -6.81938385  | -3.77065932  | H  | 10.52278905 | -7.36236561  | -0.07578943  |
| H | 10.83151215 | -5.92198879  | -4.14976683  | C  | 9.17301963  | -8.98657328  | -0.25218258  |
| C | 10.62145059 | -8.03699574  | -3.80718489  | N  | 8.92128256  | -10.31004200 | -0.58561278  |
| O | 9.34061771  | -8.13189379  | -4.28802935  | H  | 9.61868508  | -11.04368898 | -0.70158155  |
| H | 9.17417452  | -7.45852607  | -4.99745880  | C  | 7.58890102  | -10.46762920 | -0.73749018  |
| C | 11.21654464 | -9.19603806  | -3.31020691  | H  | 7.10805728  | -11.39394301 | -1.00245413  |
| H | 10.67027143 | -10.13387142 | -3.35540566  | N  | 6.97105253  | -9.31458202  | -0.52704169  |
| C | 12.48590482 | -9.11403269  | -2.74490202  | C  | 7.94503837  | -8.38201154  | -0.23261680  |
| H | 12.93989547 | -9.98929832  | -2.29289948  | H  | 7.70073658  | -7.35643657  | -0.01159418  |
| C | 5.93745762  | 1.19727377   | -5.11056020  | C  | 5.14345514  | -3.78835953  | 1.40435426   |
| H | 4.97303415  | 1.35912169   | -5.60170426  | H  | 4.72258969  | -2.90638778  | 0.90825059   |
| H | 5.78214116  | 1.38083256   | -4.04346306  | H  | 4.44983417  | -4.06793571  | 2.20297644   |
| C | 6.32288967  | -0.32219635  | -5.29998892  | C  | 5.23861399  | -4.93029580  | 0.44386410   |
| O | 5.48457010  | -1.11260801  | -4.74870958  | N  | 5.20302154  | -4.81832397  | -0.93733726  |
| O | 7.31880090  | -0.67525376  | -5.96721122  | H  | 5.14712875  | -3.97225868  | -1.51463437  |
| H | 6.81758552  | -7.61943501  | -4.85879623  | C  | 5.17905537  | -6.06452539  | -1.46005147  |
| C | 5.26979569  | -8.69867040  | -9.79022188  | H  | 5.07733364  | -6.27121900  | -2.51249487  |
| H | 5.95070916  | -8.90796962  | -10.61369397 | N  | 5.21235045  | -6.97535547  | -0.49859145  |
| H | 4.78626246  | -9.63488691  | -9.51104813  | C  | 5.24177987  | -6.28123913  | 0.69243541   |
| C | 6.10196196  | -8.11065739  | -8.64924302  | H  | 5.24298212  | -6.79182250  | 1.64479671   |
| O | 6.82099330  | -7.11479420  | -8.78202531  | C  | 5.98263968  | -10.22869071 | 2.56543345   |
| N | 6.02396343  | -8.78843016  | -7.48500590  | H  | 6.84359252  | -9.86444698  | 1.99878544   |
| H | 6.59774259  | -8.49208741  | -6.71000991  | H  | 5.37247373  | -9.35020244  | 2.81992088   |
| H | 5.31377855  | -9.50385113  | -7.33938467  | C  | 5.14281162  | -11.15109976 | 1.71725465   |
| C | 3.35205138  | -4.84863118  | -6.34771990  | N  | 4.67192547  | -10.76013383 | 0.46202975   |
| H | 3.30066747  | -3.85577897  | -6.79866081  | C  | 3.89259086  | -11.73913793 | 0.00874084   |
| H | 2.78050783  | -4.79536407  | -5.41445977  | H  | 3.35221840  | -11.72404852 | -0.92519526  |
| C | 4.78919201  | -5.14211188  | -6.03435148  | N  | 3.83878335  | -12.74211198 | 0.90028253   |
| C | 5.14293109  | -6.31156024  | -5.23154386  | H  | 3.33930875  | -13.63523435 | 0.77455191   |
| O | 4.30805532  | -7.08031214  | -4.73120768  | C  | 4.61155120  | -12.38938056 | 1.98632833   |
| C | 6.60647998  | -6.54770008  | -4.88623763  | H  | 4.67198108  | -13.01515136 | 2.86509934   |
| H | 6.72826257  | -6.19701316  | -3.85071044  | Cu | 4.97881766  | -9.02261367  | -0.59625129  |
| C | 7.60775670  | -5.76673700  | -5.70755207  | O  | 7.49091967  | -10.12663462 | -3.83625164  |
| O | 8.69755308  | -6.22424387  | -6.02149848  | H  | 7.95144083  | -10.91209816 | -3.45296475  |
| C | 7.16917332  | -4.35942363  | -6.00265107  | H  | 8.18868081  | -9.43514555  | -3.89769070  |
| N | 8.03845274  | -3.43680522  | -5.89028983  | O  | 3.02291173  | -8.77965084  | -0.73738568  |
| C | 5.74303228  | -4.20624061  | -6.29436174  | H  | 2.56883753  | -8.37619001  | -1.52086935  |
| H | 5.46195329  | -3.25036863  | -6.72679339  | H  | 2.37033216  | -9.15317652  | -0.07341603  |
| H | 7.66320570  | -2.45387694  | -5.97250389  | O  | 5.05850967  | -9.26821883  | -2.83589826  |
| C | -0.80214002 | -1.38942005  | -3.44718266  | H  | 4.72549138  | -8.57635258  | -3.43883369  |
| H | -1.07518370 | -1.14328977  | -2.41134145  | H  | 5.96228264  | -9.50700047  | -3.14862203  |
| H | -0.79710571 | -0.44452289  | -4.00046688  | O  | 2.05447818  | -7.39256490  | -2.94616479  |
| C | 0.57834052  | -1.99685958  | -3.48693866  | H  | 2.76933933  | -7.07768030  | -3.52984286  |
| C | 1.06193636  | -2.82084996  | -2.46657944  | H  | 1.33847405  | -7.60792360  | -3.58166181  |
| H | 0.40194748  | -3.10187303  | -1.64781519  | C  | 14.38163313 | -7.43858705  | -0.50736502  |
| C | 2.38878560  | -3.25388872  | -2.45145541  | C  | 6.97644297  | 2.22312035   | -5.65706020  |
| H | 2.75404079  | -3.86685659  | -1.63310422  | C  | 4.19816474  | -7.70946392  | -10.29574529 |
| C | 3.26696924  | -2.83960505  | -3.45901725  | C  | 2.64862592  | -5.85263715  | -7.29306993  |
| O | 4.59228323  | -3.17570124  | -3.37794271  | C  | -1.90660978 | -2.28384208  | -4.03415925  |
| H | 5.11181385  | -2.47042054  | -3.88858275  | C  | 10.94721643 | -8.75075980  | 1.53966834   |
|   |             |              |              | C  | 6.49424423  | -3.39741556  | 2.05228795   |
|   |             |              |              | C  | 6.48510123  | -10.84217808 | 3.87082475   |

imq(keto rot ^-)

|   |             |              |              |    |             |              |              |
|---|-------------|--------------|--------------|----|-------------|--------------|--------------|
| C | 14.52458184 | -7.88848145  | -1.97109690  | C  | 2.78176534  | -2.06656986  | -4.51109076  |
| H | 14.94084081 | -8.89890021  | -1.98674551  | H  | 3.48330947  | -1.70237370  | -5.25069837  |
| H | 15.25445349 | -7.23597578  | -2.45228147  | C  | 1.45872996  | -1.64714428  | -4.51061011  |
| C | 13.19389052 | -7.90793031  | -2.68604864  | H  | 1.10886500  | -0.99787883  | -5.31009609  |
| C | 12.58782808 | -6.76197048  | -3.22189579  | C  | 10.51760883 | -8.44191612  | 0.08202554   |
| H | 13.09765226 | -5.80333656  | -3.17928109  | H  | 11.27917886 | -8.84790544  | -0.58477924  |
| C | 11.30654061 | -6.82299054  | -3.76874212  | H  | 10.51813456 | -7.35994160  | -0.07405419  |
| H | 10.82652540 | -5.92470272  | -4.14283040  | C  | 9.17051386  | -8.98519196  | -0.25176041  |
| C | 10.61729423 | -8.04057053  | -3.79272025  | N  | 8.91897500  | -10.30873603 | -0.58488626  |
| O | 9.33314327  | -8.14051959  | -4.26261512  | H  | 9.61596067  | -11.04160327 | -0.70712753  |
| H | 9.16270086  | -7.46277706  | -4.96193775  | C  | 7.58659220  | -10.46599702 | -0.73403086  |
| C | 11.21735260 | -9.19983701  | -3.30339071  | H  | 7.10598583  | -11.39078058 | -1.00419560  |
| H | 10.67084850 | -10.13715320 | -3.34870355  | N  | 6.96905557  | -9.31377236  | -0.52080468  |
| C | 12.49074238 | -9.11710732  | -2.74787033  | C  | 7.94302228  | -8.38081623  | -0.22931275  |
| H | 12.94539599 | -9.99053444  | -2.29312210  | H  | 7.69969274  | -7.35451213  | -0.01006940  |
| C | 5.94400154  | 1.18140448   | -5.11208837  | C  | 5.14087586  | -3.78751376  | 1.40316977   |
| H | 4.98017406  | 1.33827351   | -5.60665734  | H  | 4.71981341  | -2.90447464  | 0.90886165   |
| H | 5.78716787  | 1.36440467   | -4.04512419  | H  | 4.44817272  | -4.06880828  | 2.20181657   |
| C | 6.33549483  | -0.33185267  | -5.30275984  | C  | 5.23435695  | -4.92839329  | 0.44211995   |
| O | 5.50016708  | -1.13259780  | -4.76238940  | N  | 5.20495169  | -4.81421013  | -0.93846468  |
| O | 7.34113978  | -0.68067449  | -5.95922140  | H  | 5.14881299  | -3.96849428  | -1.51617020  |
| H | 6.68988269  | -7.71604431  | -5.61103667  | C  | 5.18901070  | -6.05881219  | -1.46569653  |
| C | 5.32621720  | -8.64778746  | -9.73033750  | H  | 5.11128062  | -6.26208090  | -2.51996526  |
| H | 6.00688418  | -8.88421471  | -10.55076819 | N  | 5.21512207  | -6.97034926  | -0.50486230  |
| H | 4.86580299  | -9.57391878  | -9.39065592  | C  | 5.23819936  | -6.27931644  | 0.68808782   |
| C | 6.16084708  | -8.11108252  | -8.56583153  | H  | 5.24172052  | -6.79058337  | 1.64008066   |
| O | 6.53559940  | -8.84430779  | -7.67259056  | C  | 5.98491518  | -10.22855147 | 2.56244319   |
| N | 6.65334415  | -6.78616047  | -8.61431598  | H  | 6.84766006  | -9.86864886  | 1.99547617   |
| H | 7.20018875  | -6.58917877  | -7.78387931  | H  | 5.37837670  | -9.34782927  | 2.81570517   |
| H | 5.98603273  | -6.03934023  | -8.79573313  | C  | 5.14158855  | -11.14875595 | 1.71498278   |
| C | 3.33412919  | -4.85560576  | -6.32499939  | N  | 4.67432593  | -10.75808282 | 0.45851182   |
| H | 3.28671913  | -3.85985311  | -6.77134651  | C  | 3.89800387  | -11.73805128 | 0.00276836   |
| H | 2.75011782  | -4.80672427  | -5.39919604  | H  | 3.35685615  | -11.72216410 | -0.93055258  |
| C | 4.76523870  | -5.15095049  | -5.99273122  | N  | 3.84361426  | -12.74216745 | 0.89285799   |
| C | 5.10963642  | -6.35074117  | -5.21485605  | H  | 3.34803097  | -13.63672619 | 0.76514021   |
| O | 4.25587321  | -7.04478481  | -4.65042208  | C  | 4.61433625  | -12.38986883 | 1.98029443   |
| C | 6.56427247  | -6.75754420  | -5.08728823  | H  | 4.68204333  | -13.02172199 | 2.85425763   |
| H | 6.79897907  | -6.96265056  | -4.03257821  | Cu | 4.97982803  | -9.02229055  | -0.60335719  |
| C | 7.57765848  | -5.76968251  | -5.62204900  | O  | 7.47363113  | -10.14741300 | -3.81169237  |
| O | 8.71706728  | -6.13828205  | -5.89362431  | H  | 7.95680961  | -10.92972452 | -3.44928340  |
| C | 7.13099169  | -4.34994142  | -5.84142118  | H  | 8.15782605  | -9.45160810  | -3.91177380  |
| N | 8.01021712  | -3.43250127  | -5.75291121  | O  | 3.02095222  | -8.77889010  | -0.73030360  |
| C | 5.71128356  | -4.18952902  | -6.16439654  | H  | 2.55299274  | -8.36570618  | -1.50110744  |
| H | 5.43162231  | -3.20679616  | -6.53567297  | H  | 2.37557591  | -9.16194005  | -0.06217234  |
| H | 7.64706125  | -2.44593860  | -5.86318685  | O  | 5.07448015  | -9.25398136  | -2.82165432  |
| C | -0.80203529 | -1.39709795  | -3.44709775  | H  | 4.70957755  | -8.59992067  | -3.44795134  |
| H | -1.07543254 | -1.15635279  | -2.41022735  | H  | 5.95870017  | -9.52630731  | -3.16734707  |
| H | -0.79498555 | -0.44985698  | -3.99554855  | O  | 1.99877184  | -7.37369392  | -2.89389151  |
| C | 0.57510766  | -2.00697241  | -3.48784766  | H  | 2.72187335  | -7.03135279  | -3.44539508  |
| C | 1.04604608  | -2.85821063  | -2.48409698  | H  | 1.30973863  | -7.60555930  | -3.55092765  |
| H | 0.37394063  | -3.16720016  | -1.68588817  | C  | 14.37532719 | -7.43744876  | -0.50955363  |
| C | 2.37245624  | -3.29039978  | -2.46308207  | C  | 6.97894899  | 2.21116353   | -5.65524653  |
| H | 2.72835255  | -3.93025772  | -1.66145722  | C  | 4.23177602  | -7.69557211  | -10.26805736 |
| C | 3.26216131  | -2.84494284  | -3.44733340  | C  | 2.64297428  | -5.85719909  | -7.28206378  |
| O | 4.58911455  | -3.17025168  | -3.35109217  | C  | -1.90562389 | -2.28713123  | -4.03955889  |
| H | 5.10824354  | -2.46330078  | -3.85487212  | C  | 10.94478547 | -8.75060747  | 1.53886506   |
|   |             |              |              | C  | 6.49237133  | -3.39805176  | 2.05052121   |
|   |             |              |              | C  | 6.48451185  | -10.84365249 | 3.86787462   |
